# Supplementary material for: Solar-Aligned Pictographs at the Paleoindian Site of Painel do Pilão along the Lower Amazon River at Monte Alegre, Brazil
Source: PubMed Central journal article supplement (PMC5173343; doi:10.1371/journal.pone.0167692), 2016-12-20
Supplement: pone.0167692.s001.pdf [file pone.0167692.s001.pdf]

## **NSF-Arizona AMS Laboratory**

*Data Report (unofficial) - radiocarbon age BP*

University of Arizona - PAS Building  
1118 E. 4th Street  
P.O. Box 210081

| AA      | lab #   | sample ID   | MASS   | d13C  | run date  | F (d13C) | dF (d13C) | 14C age BP | d14C age |
|---------|---------|-------------|--------|-------|-----------|----------|-----------|------------|----------|
| AA99814 | X24022  | 20110106-17 | 1.60mg | -26.5 | N12-10-12 | 0.2477   | 0.0021    | 11,212     | 69       |
| AA99815 | X24023  | 20110107-13 | 1.43mg | -25.4 | N11-13-12 | 0.2515   | 0.0020    | 11,088     | 64       |
| AA99816 | X24024  | 20110107-14 | 1.97mg | -26.3 | N12-10-12 | 0.2496   | 0.0022    | 11,148     | 71       |
| AA99817 | X24025A | 20110108-3  | 1.21mg | -24.5 | N11-13-12 | 0.6178   | 0.0032    | 3,869      | 42       |
| AA99818 | X24026  | 20110108-5  | 0.07mg | -25.7 | N12-10-12 | <0.0230  |           | >30,300    |          |

Contact: Davis, C.

| <b>AA #</b><br><b>14C age BP</b> | <b>Sample ID</b> | <b>Suite</b> | <b>Material</b> | <b>d13C</b> | <b>F</b>          |
|----------------------------------|------------------|--------------|-----------------|-------------|-------------------|
| AA100630<br>2,112 +/-            | 2011 01 07.20    | 1 of 2<br>40 | wood            | -26.3       | 0.7688 +/- 0.0038 |
| AA100631<br>10,993 +/-           | 2011 0107.2      | 2 of 2<br>62 | wood            | -26.0       | 0.2545 +/- 0.0020 |

Reported by

---

| Name                                                                             | Unmodelled (BC/AD) |        |      | Select                                           | Page break               |
|----------------------------------------------------------------------------------|--------------------|--------|------|--------------------------------------------------|--------------------------|
|                                                                                  | from               | to     | %    | All Visible                                      |                          |
| <a href="#">Show all</a><br><a href="#">Show structure</a><br>R_Date 20110107-14 | -11276             | -10829 | 95.4 | <input checked="" type="checkbox"/> <sup>2</sup> | <input type="checkbox"/> |

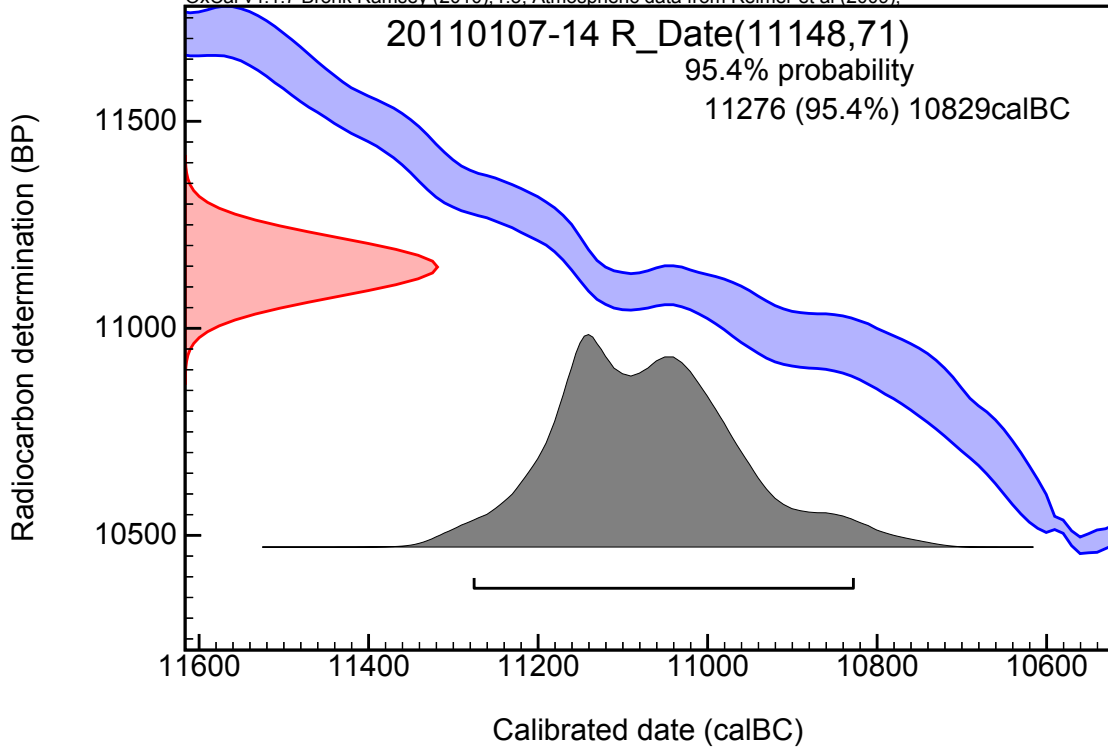

| Name                                                       | Unmodelled (BC/AD)                                                                |        |        | Select | Page break                                       |                          |
|------------------------------------------------------------|-----------------------------------------------------------------------------------|--------|--------|--------|--------------------------------------------------|--------------------------|
| <a href="#">Show all</a><br><a href="#">Show structure</a> |   | from   | to     | %      | <a href="#">All Visible</a>                      |                          |
| <a href="#">R_Date 20110106-17</a>                         |  | -11336 | -10944 | 95.4   | <input checked="" type="checkbox"/> <sup>2</sup> | <input type="checkbox"/> |

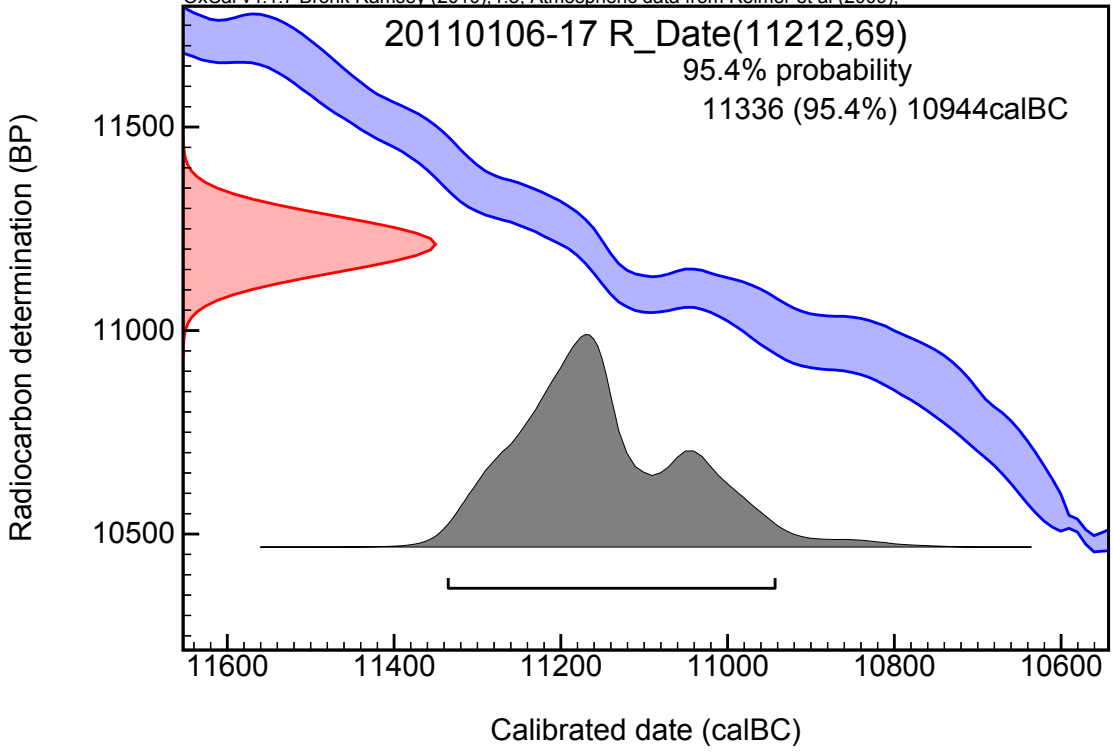

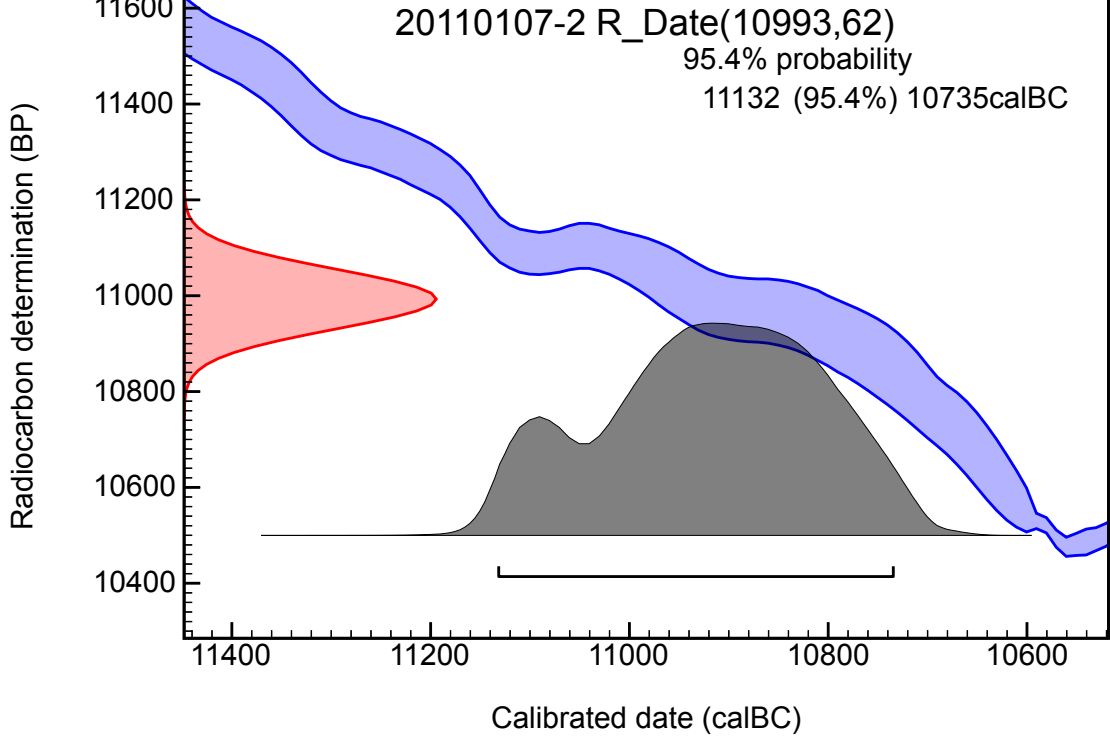

| Name                                                       | Unmodelled (BC/AD)                                                                | Select                                                              | Page break               |
|------------------------------------------------------------|-----------------------------------------------------------------------------------|---------------------------------------------------------------------|--------------------------|
| <a href="#">Show all</a><br><a href="#">Show structure</a> |   | from    to    % <a href="#">All Visible</a>                         |                          |
| R_Date 20110107-13                                         |  | -11186 -10786 95.4 <input checked="" type="checkbox"/> <sup>2</sup> | <input type="checkbox"/> |



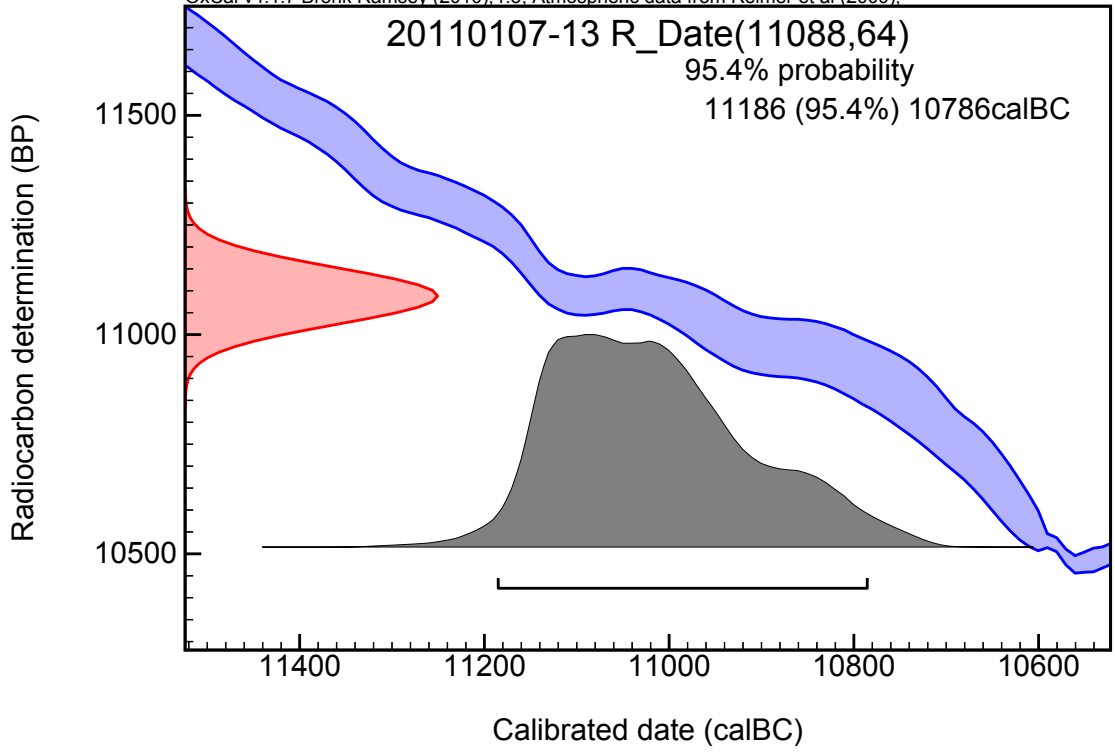

| Name                                                                            | Unmodelled (BC/AD) |       |      | Select                                | Page break               |
|---------------------------------------------------------------------------------|--------------------|-------|------|---------------------------------------|--------------------------|
|                                                                                 | from               | to    | %    | All Visible                           |                          |
| <a href="#">Show all</a><br><a href="#">Show structure</a><br>R_Date 20110108-3 | -2468              | -2206 | 95.4 | <input checked="" type="checkbox"/> 2 | <input type="checkbox"/> |

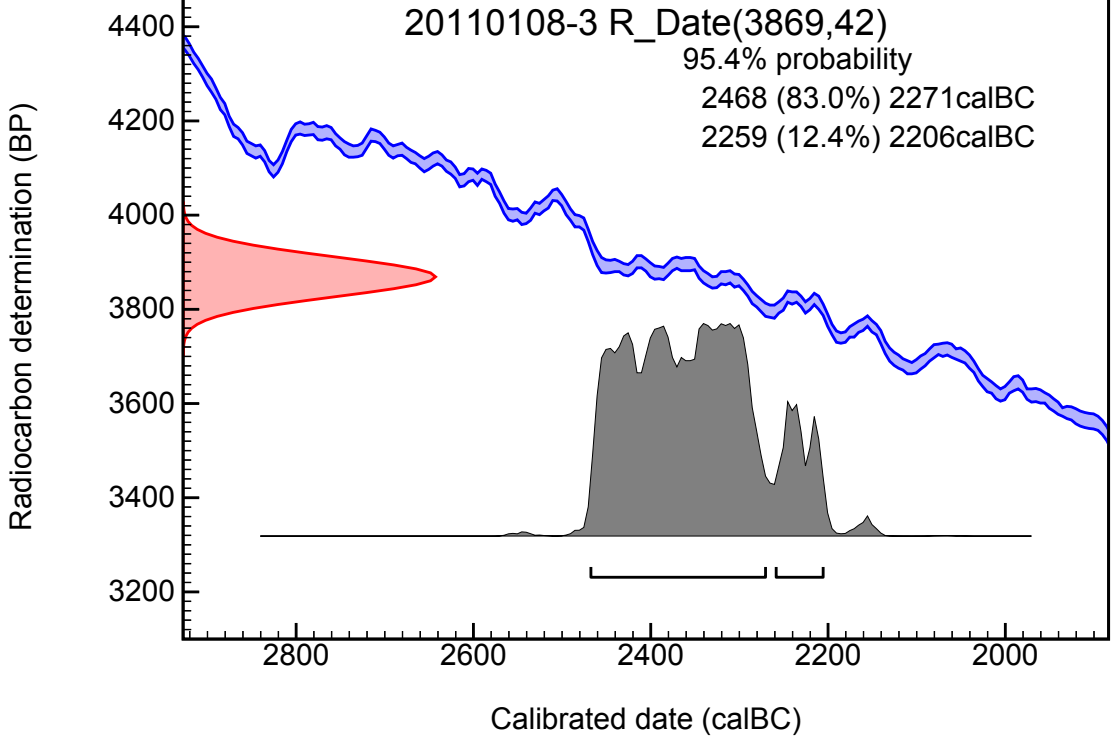

| Name                                                                            | Unmodelled (BC/AD) |        |      | Select                                           | Page break               |
|---------------------------------------------------------------------------------|--------------------|--------|------|--------------------------------------------------|--------------------------|
|                                                                                 | from               | to     | %    | All Visible                                      |                          |
| <a href="#">Show all</a><br><a href="#">Show structure</a><br>R_Date 20110108-5 | -33121             | -32698 | 95.4 | <input checked="" type="checkbox"/> <sup>2</sup> | <input type="checkbox"/> |

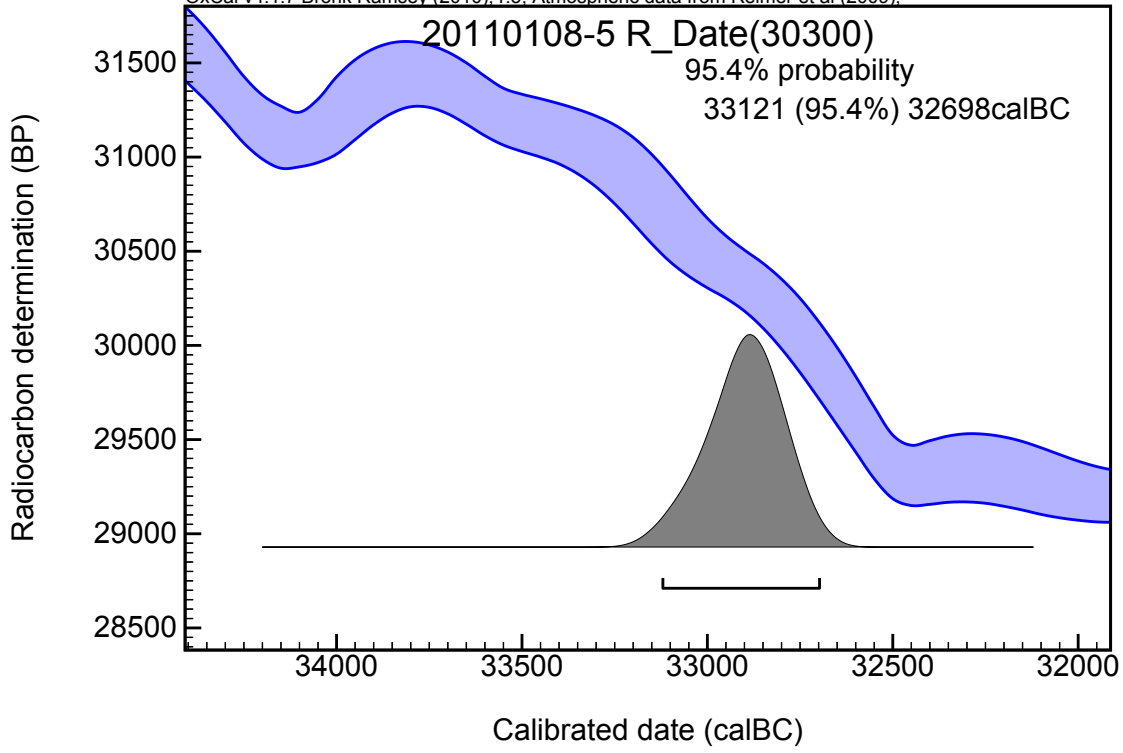

Location: W054 10, S02 03

Rise and Set for the Sun for 2010

Astronomical Applications Dept.  
U. S. Naval Observatory  
Washington, DC 20392-5420

Zone: 3h West of Greenwich

| Day | Jan. |      | Feb. |      | Mar. |      | Apr. |      | May  |      | June |      | July |      | Aug. |      | Sept. |      | Oct. |      | Nov. |      | Dec. |      |
|-----|------|------|------|------|------|------|------|------|------|------|------|------|------|------|------|------|-------|------|------|------|------|------|------|------|
|     | Rise | Set  | Rise  | Set  | Rise | Set  | Rise | Set  | Rise | Set  |
|     | h m  | h m  | h m  | h m  | h m  | h m  | h m  | h m  | h m  | h m  | h m  | h m  | h m  | h m  | h m  | h m  | h m   | h m  | h m  | h m  | h m  | h m  | h m  | h m  |
| 01  | 0633 | 1848 | 0644 | 1856 | 0645 | 1853 | 0638 | 1843 | 0633 | 1835 | 0634 | 1835 | 0640 | 1841 | 0642 | 1844 | 0635  | 1839 | 0623 | 1830 | 0615 | 1826 | 0619 | 1833 |
| 02  | 0634 | 1848 | 0644 | 1856 | 0644 | 1853 | 0638 | 1843 | 0632 | 1835 | 0634 | 1835 | 0641 | 1841 | 0642 | 1844 | 0634  | 1838 | 0622 | 1830 | 0615 | 1826 | 0619 | 1833 |
| 03  | 0634 | 1848 | 0645 | 1856 | 0644 | 1853 | 0637 | 1842 | 0632 | 1835 | 0635 | 1835 | 0641 | 1841 | 0642 | 1844 | 0634  | 1838 | 0622 | 1830 | 0615 | 1826 | 0619 | 1834 |
| 04  | 0635 | 1849 | 0645 | 1856 | 0644 | 1853 | 0637 | 1842 | 0632 | 1835 | 0635 | 1835 | 0641 | 1841 | 0642 | 1844 | 0633  | 1838 | 0622 | 1829 | 0615 | 1826 | 0620 | 1834 |
| 05  | 0635 | 1849 | 0645 | 1856 | 0644 | 1852 | 0637 | 1842 | 0632 | 1834 | 0635 | 1835 | 0641 | 1841 | 0642 | 1844 | 0633  | 1838 | 0621 | 1829 | 0615 | 1826 | 0620 | 1834 |
| 06  | 0635 | 1850 | 0645 | 1856 | 0644 | 1852 | 0637 | 1841 | 0632 | 1834 | 0635 | 1836 | 0641 | 1842 | 0642 | 1844 | 0633  | 1837 | 0621 | 1829 | 0614 | 1826 | 0621 | 1835 |
| 07  | 0636 | 1850 | 0645 | 1856 | 0644 | 1852 | 0636 | 1841 | 0632 | 1834 | 0635 | 1836 | 0641 | 1842 | 0641 | 1843 | 0632  | 1837 | 0620 | 1829 | 0614 | 1826 | 0621 | 1835 |
| 08  | 0636 | 1850 | 0645 | 1856 | 0643 | 1851 | 0636 | 1841 | 0632 | 1834 | 0636 | 1836 | 0642 | 1842 | 0641 | 1843 | 0632  | 1837 | 0620 | 1828 | 0615 | 1826 | 0621 | 1836 |
| 09  | 0637 | 1851 | 0645 | 1856 | 0643 | 1851 | 0636 | 1840 | 0632 | 1834 | 0636 | 1836 | 0642 | 1842 | 0641 | 1843 | 0632  | 1837 | 0620 | 1828 | 0615 | 1827 | 0622 | 1836 |
| 10  | 0637 | 1851 | 0645 | 1856 | 0643 | 1851 | 0636 | 1840 | 0632 | 1834 | 0636 | 1836 | 0642 | 1842 | 0641 | 1843 | 0631  | 1836 | 0619 | 1828 | 0615 | 1827 | 0622 | 1837 |
| 11  | 0638 | 1852 | 0645 | 1856 | 0643 | 1850 | 0636 | 1840 | 0632 | 1834 | 0636 | 1836 | 0642 | 1842 | 0641 | 1843 | 0631  | 1836 | 0619 | 1828 | 0615 | 1827 | 0623 | 1837 |
| 12  | 0638 | 1852 | 0645 | 1856 | 0643 | 1850 | 0635 | 1839 | 0632 | 1834 | 0636 | 1837 | 0642 | 1843 | 0641 | 1843 | 0630  | 1836 | 0619 | 1828 | 0615 | 1827 | 0623 | 1838 |
| 13  | 0639 | 1852 | 0646 | 1856 | 0642 | 1850 | 0635 | 1839 | 0632 | 1834 | 0637 | 1837 | 0642 | 1843 | 0640 | 1843 | 0630  | 1835 | 0619 | 1827 | 0615 | 1827 | 0624 | 1838 |
| 14  | 0639 | 1853 | 0646 | 1856 | 0642 | 1849 | 0635 | 1839 | 0632 | 1834 | 0637 | 1837 | 0642 | 1843 | 0640 | 1843 | 0629  | 1835 | 0618 | 1827 | 0615 | 1827 | 0624 | 1839 |
| 15  | 0639 | 1853 | 0646 | 1856 | 0642 | 1849 | 0635 | 1839 | 0632 | 1834 | 0637 | 1837 | 0642 | 1843 | 0640 | 1843 | 0629  | 1835 | 0618 | 1827 | 0615 | 1828 | 0625 | 1839 |
| 16  | 0640 | 1853 | 0646 | 1856 | 0642 | 1849 | 0635 | 1838 | 0632 | 1834 | 0637 | 1838 | 0642 | 1843 | 0640 | 1842 | 0629  | 1834 | 0618 | 1827 | 0615 | 1828 | 0625 | 1840 |
| 17  | 0640 | 1854 | 0646 | 1856 | 0642 | 1848 | 0634 | 1838 | 0632 | 1834 | 0638 | 1838 | 0642 | 1843 | 0639 | 1842 | 0628  | 1834 | 0617 | 1827 | 0615 | 1828 | 0626 | 1840 |
| 18  | 0640 | 1854 | 0646 | 1856 | 0641 | 1848 | 0634 | 1838 | 0633 | 1834 | 0638 | 1838 | 0643 | 1843 | 0639 | 1842 | 0628  | 1834 | 0617 | 1827 | 0615 | 1828 | 0626 | 1841 |
| 19  | 0641 | 1854 | 0645 | 1855 | 0641 | 1848 | 0634 | 1837 | 0633 | 1834 | 0638 | 1838 | 0643 | 1843 | 0639 | 1842 | 0627  | 1834 | 0617 | 1826 | 0616 | 1829 | 0626 | 1841 |
| 20  | 0641 | 1854 | 0645 | 1855 | 0641 | 1847 | 0634 | 1837 | 0633 | 1834 | 0638 | 1838 | 0643 | 1844 | 0639 | 1842 | 0627  | 1833 | 0617 | 1826 | 0616 | 1829 | 0627 | 1842 |
| 21  | 0641 | 1855 | 0645 | 1855 | 0641 | 1847 | 0634 | 1837 | 0633 | 1834 | 0638 | 1839 | 0643 | 1844 | 0638 | 1841 | 0627  | 1833 | 0616 | 1826 | 0616 | 1829 | 0627 | 1842 |
| 22  | 0642 | 1855 | 0645 | 1855 | 0640 | 1847 | 0634 | 1837 | 0633 | 1834 | 0639 | 1839 | 0643 | 1844 | 0638 | 1841 | 0626  | 1833 | 0616 | 1826 | 0616 | 1829 | 0628 | 1843 |
| 23  | 0642 | 1855 | 0645 | 1855 | 0640 | 1846 | 0633 | 1837 | 0633 | 1834 | 0639 | 1839 | 0643 | 1844 | 0638 | 1841 | 0626  | 1832 | 0616 | 1826 | 0616 | 1830 | 0628 | 1843 |
| 24  | 0642 | 1855 | 0645 | 1855 | 0640 | 1846 | 0633 | 1836 | 0633 | 1834 | 0639 | 1839 | 0643 | 1844 | 0637 | 1841 | 0625  | 1832 | 0616 | 1826 | 0617 | 1830 | 0629 | 1844 |
| 25  | 0643 | 1855 | 0645 | 1854 | 0640 | 1846 | 0633 | 1836 | 0633 | 1834 | 0639 | 1839 | 0643 | 1844 | 0637 | 1841 | 0625  | 1832 | 0616 | 1826 | 0617 | 1830 | 0629 | 1844 |
| 26  | 0643 | 1856 | 0645 | 1854 | 0639 | 1845 | 0633 | 1836 | 0633 | 1834 | 0639 | 1840 | 0643 | 1844 | 0637 | 1840 | 0625  | 1831 | 0615 | 1826 | 0617 | 1831 | 0630 | 1845 |
| 27  | 0643 | 1856 | 0645 | 1854 | 0639 | 1845 | 0633 | 1836 | 0633 | 1834 | 0640 | 1840 | 0643 | 1844 | 0636 | 1840 | 0624  | 1831 | 0615 | 1826 | 0617 | 1831 | 0630 | 1845 |
| 28  | 0643 | 1856 | 0645 | 1854 | 0639 | 1845 | 0633 | 1835 | 0634 | 1834 | 0640 | 1840 | 0643 | 1844 | 0636 | 1840 | 0624  | 1831 | 0615 | 1826 | 0618 | 1832 | 0631 | 1846 |
| 29  | 0644 | 1856 |      |      | 0639 | 1844 | 0633 | 1835 | 0634 | 1834 | 0640 | 1840 | 0642 | 1844 | 0636 | 1840 | 0623  | 1831 | 0615 | 1826 | 0618 | 1832 | 0631 | 1846 |
| 30  | 0644 | 1856 |      |      | 0638 | 1844 | 0633 | 1835 | 0634 | 1835 | 0640 | 1841 | 0642 | 1844 | 0635 | 1839 | 0623  | 1830 | 0615 | 1826 | 0618 | 1832 | 0632 | 1846 |
| 31  | 0644 | 1856 |      |      | 0638 | 1843 |      |      | 0634 | 1835 |      |      | 0642 | 1844 | 0635 | 1839 |       |      | 0615 | 1826 |      |      | 0632 | 1847 |

[Back to form](#)

Astronomical Applications Dept.  
U.S. Naval Observatory  
Washington, DC 20392-5420

MONTE ALEGRE

° , ° ,  
W 54 10, S 2 03

Altitude and Azimuth of the Sun  
Jan 26, 2010

Zone: 3h West of Greenwich

|       | Altitude | Azimuth  |
|-------|----------|----------|
|       |          | (E of N) |
| h m   | o        | o        |
| 06:00 | -11.0    | 109.5    |
| 06:10 | -8.6     | 109.3    |
| 06:20 | -6.2     | 109.1    |
| 06:30 | -3.9     | 108.9    |
| 06:40 | -1.5     | 108.8    |
| 06:50 | 1.2      | 108.7    |
| 07:00 | 3.4      | 108.6    |
| 07:10 | 5.7      | 108.6    |
| 07:20 | 8.1      | 108.6    |
| 07:30 | 10.4     | 108.6    |
| 07:40 | 12.8     | 108.7    |
| 07:50 | 15.1     | 108.8    |
| 08:00 | 17.5     | 108.9    |
| 08:10 | 19.8     | 109.1    |
| 08:20 | 22.2     | 109.3    |
| 08:30 | 24.5     | 109.6    |
| 08:40 | 26.9     | 109.9    |
| 08:50 | 29.2     | 110.3    |
| 09:00 | 31.6     | 110.7    |
| 09:10 | 33.9     | 111.2    |
| 09:20 | 36.2     | 111.8    |
| 09:30 | 38.5     | 112.4    |
| 09:40 | 40.8     | 113.1    |
| 09:50 | 43.1     | 113.9    |
| 10:00 | 45.4     | 114.8    |
| 10:10 | 47.6     | 115.8    |
| 10:20 | 49.9     | 117.0    |
| 10:30 | 52.1     | 118.3    |
| 10:40 | 54.3     | 119.9    |
| 10:50 | 56.4     | 121.6    |
| 11:00 | 58.5     | 123.7    |
| 11:10 | 60.6     | 126.0    |
| 11:20 | 62.6     | 128.7    |
| 11:30 | 64.5     | 131.8    |
| 11:40 | 66.3     | 135.5    |
| 11:50 | 68.0     | 139.8    |
| 12:00 | 69.5     | 144.8    |
| 12:10 | 70.8     | 150.6    |
| 12:20 | 71.9     | 157.1    |
| 12:30 | 72.8     | 164.4    |
| 12:40 | 73.3     | 172.4    |

|       |       |       |
|-------|-------|-------|
| 12:50 | 73.4  | 180.6 |
| 13:00 | 73.2  | 188.9 |
| 13:10 | 72.7  | 196.7 |
| 13:20 | 71.8  | 203.9 |
| 13:30 | 70.7  | 210.4 |
| 13:40 | 69.3  | 216.0 |
| 13:50 | 67.7  | 220.9 |
| 14:00 | 66.0  | 225.1 |
| 14:10 | 64.2  | 228.7 |
| 14:20 | 62.3  | 231.8 |
| 14:30 | 60.3  | 234.4 |
| 14:40 | 58.2  | 236.7 |
| 14:50 | 56.1  | 238.7 |
| 15:00 | 54.0  | 240.4 |
| 15:10 | 51.8  | 241.9 |
| 15:20 | 49.6  | 243.3 |
| 15:30 | 47.3  | 244.4 |
| 15:40 | 45.1  | 245.4 |
| 15:50 | 42.8  | 246.3 |
| 16:00 | 40.5  | 247.1 |
| 16:10 | 38.2  | 247.8 |
| 16:20 | 35.9  | 248.4 |
| 16:30 | 33.5  | 249.0 |
| 16:40 | 31.2  | 249.4 |
| 16:50 | 28.9  | 249.9 |
| 17:00 | 26.5  | 250.2 |
| 17:10 | 24.2  | 250.5 |
| 17:20 | 21.8  | 250.8 |
| 17:30 | 19.5  | 251.0 |
| 17:40 | 17.1  | 251.2 |
| 17:50 | 14.8  | 251.3 |
| 18:00 | 12.4  | 251.4 |
| 18:10 | 10.0  | 251.5 |
| 18:20 | 7.7   | 251.5 |
| 18:30 | 5.4   | 251.5 |
| 18:40 | 3.1   | 251.5 |
| 18:50 | 0.9   | 251.4 |
| 19:00 | -1.9  | 251.3 |
| 19:10 | -4.3  | 251.2 |
| 19:20 | -6.6  | 251.1 |
| 19:30 | -9.0  | 250.9 |
| 19:40 | -11.3 | 250.6 |

[Back to form](#)



Astronomical Applications Dept.  
U.S. Naval Observatory  
Washington, DC 20392-5420

MONTE ALEGRE

° , ° ,  
W 54 10, S 2 03

Altitude and Azimuth of the Sun  
Feb 11, 2010

Zone: 3h West of Greenwich

|       | Altitude | Azimuth  |
|-------|----------|----------|
|       |          | (E of N) |
| h m   | o        | o        |
| 06:00 | -11.8    | 104.8    |
| 06:10 | -9.4     | 104.6    |
| 06:20 | -7.0     | 104.4    |
| 06:30 | -4.6     | 104.2    |
| 06:40 | -2.1     | 104.1    |
| 06:50 | 0.7      | 104.0    |
| 07:00 | 2.9      | 103.9    |
| 07:10 | 5.3      | 103.9    |
| 07:20 | 7.7      | 103.8    |
| 07:30 | 10.1     | 103.8    |
| 07:40 | 12.5     | 103.9    |
| 07:50 | 14.9     | 103.9    |
| 08:00 | 17.3     | 104.0    |
| 08:10 | 19.7     | 104.1    |
| 08:20 | 22.1     | 104.3    |
| 08:30 | 24.6     | 104.4    |
| 08:40 | 27.0     | 104.6    |
| 08:50 | 29.4     | 104.9    |
| 09:00 | 31.8     | 105.2    |
| 09:10 | 34.2     | 105.5    |
| 09:20 | 36.6     | 105.9    |
| 09:30 | 39.0     | 106.4    |
| 09:40 | 41.4     | 106.9    |
| 09:50 | 43.8     | 107.4    |
| 10:00 | 46.2     | 108.1    |
| 10:10 | 48.5     | 108.9    |
| 10:20 | 50.9     | 109.8    |
| 10:30 | 53.2     | 110.8    |
| 10:40 | 55.6     | 112.0    |
| 10:50 | 57.9     | 113.3    |
| 11:00 | 60.1     | 114.9    |
| 11:10 | 62.4     | 116.8    |
| 11:20 | 64.6     | 119.1    |
| 11:30 | 66.8     | 121.8    |
| 11:40 | 68.8     | 125.1    |
| 11:50 | 70.8     | 129.1    |
| 12:00 | 72.7     | 134.0    |
| 12:10 | 74.4     | 140.1    |
| 12:20 | 75.9     | 147.7    |
| 12:30 | 77.1     | 156.8    |
| 12:40 | 77.8     | 167.4    |

|       |       |       |
|-------|-------|-------|
| 12:50 | 78.1  | 178.9 |
| 13:00 | 77.9  | 190.6 |
| 13:10 | 77.2  | 201.5 |
| 13:20 | 76.1  | 210.9 |
| 13:30 | 74.7  | 218.7 |
| 13:40 | 73.0  | 225.0 |
| 13:50 | 71.2  | 230.2 |
| 14:00 | 69.2  | 234.3 |
| 14:10 | 67.2  | 237.7 |
| 14:20 | 65.0  | 240.5 |
| 14:30 | 62.8  | 242.9 |
| 14:40 | 60.6  | 244.8 |
| 14:50 | 58.3  | 246.5 |
| 15:00 | 56.0  | 247.9 |
| 15:10 | 53.7  | 249.1 |
| 15:20 | 51.3  | 250.2 |
| 15:30 | 49.0  | 251.1 |
| 15:40 | 46.6  | 251.9 |
| 15:50 | 44.2  | 252.6 |
| 16:00 | 41.8  | 253.2 |
| 16:10 | 39.4  | 253.7 |
| 16:20 | 37.0  | 254.1 |
| 16:30 | 34.6  | 254.5 |
| 16:40 | 32.2  | 254.9 |
| 16:50 | 29.8  | 255.2 |
| 17:00 | 27.4  | 255.4 |
| 17:10 | 25.0  | 255.7 |
| 17:20 | 22.6  | 255.8 |
| 17:30 | 20.2  | 256.0 |
| 17:40 | 17.7  | 256.1 |
| 17:50 | 15.3  | 256.2 |
| 18:00 | 12.9  | 256.3 |
| 18:10 | 10.5  | 256.3 |
| 18:20 | 8.1   | 256.3 |
| 18:30 | 5.7   | 256.3 |
| 18:40 | 3.4   | 256.3 |
| 18:50 | 1.1   | 256.2 |
| 19:00 | -1.7  | 256.1 |
| 19:10 | -4.1  | 256.0 |
| 19:20 | -6.6  | 255.8 |
| 19:30 | -9.0  | 255.7 |
| 19:40 | -11.4 | 255.5 |

[Back to form](#)

Astronomical Applications Dept.  
U.S. Naval Observatory  
Washington, DC 20392-5420

° , ° ,  
W 54 10, S 2 03

Altitude and Azimuth of the Sun  
Mar 15, 2010

Zone: 3h West of Greenwich

|       | Altitude | Azimuth  |
|-------|----------|----------|
|       |          | (E of N) |
| h m   | °        | °        |
| 05:58 | -11.8    | 92.6     |
| 05:59 | -11.6    | 92.6     |
| 06:00 | -11.3    | 92.6     |
| 06:01 | -11.1    | 92.6     |
| 06:02 | -10.8    | 92.5     |
| 06:03 | -10.6    | 92.5     |
| 06:04 | -10.3    | 92.5     |
| 06:05 | -10.1    | 92.5     |
| 06:06 | -9.8     | 92.5     |
| 06:07 | -9.6     | 92.5     |
| 06:08 | -9.3     | 92.5     |
| 06:09 | -9.1     | 92.5     |
| 06:10 | -8.8     | 92.5     |
| 06:11 | -8.6     | 92.4     |
| 06:12 | -8.3     | 92.4     |
| 06:13 | -8.1     | 92.4     |
| 06:14 | -7.8     | 92.4     |
| 06:15 | -7.6     | 92.4     |
| 06:16 | -7.3     | 92.4     |
| 06:17 | -7.1     | 92.4     |
| 06:18 | -6.8     | 92.4     |
| 06:19 | -6.6     | 92.4     |
| 06:20 | -6.3     | 92.4     |
| 06:21 | -6.1     | 92.3     |
| 06:22 | -5.8     | 92.3     |
| 06:23 | -5.6     | 92.3     |
| 06:24 | -5.3     | 92.3     |
| 06:25 | -5.1     | 92.3     |
| 06:26 | -4.8     | 92.3     |
| 06:27 | -4.6     | 92.3     |
| 06:28 | -4.3     | 92.3     |
| 06:29 | -4.1     | 92.3     |
| 06:30 | -3.8     | 92.3     |
| 06:31 | -3.6     | 92.2     |
| 06:32 | -3.3     | 92.2     |
| 06:33 | -3.1     | 92.2     |
| 06:34 | -2.8     | 92.2     |
| 06:35 | -2.6     | 92.2     |
| 06:36 | -2.3     | 92.2     |
| 06:37 | -2.1     | 92.2     |
| 06:38 | -1.8     | 92.2     |

|       |      |      |
|-------|------|------|
| 06:39 | -1.6 | 92.2 |
| 06:40 | -1.3 | 92.2 |
| 06:41 | -1.1 | 92.1 |
| 06:42 | -0.8 | 92.1 |
| 06:43 | -0.0 | 92.1 |
| 06:44 | 0.2  | 92.1 |
| 06:45 | 0.4  | 92.1 |
| 06:46 | 0.6  | 92.1 |
| 06:47 | 0.8  | 92.1 |
| 06:48 | 1.1  | 92.1 |
| 06:49 | 1.3  | 92.1 |
| 06:50 | 1.5  | 92.1 |
| 06:51 | 1.7  | 92.1 |
| 06:52 | 2.0  | 92.0 |
| 06:53 | 2.2  | 92.0 |
| 06:54 | 2.4  | 92.0 |
| 06:55 | 2.7  | 92.0 |
| 06:56 | 2.9  | 92.0 |
| 06:57 | 3.1  | 92.0 |
| 06:58 | 3.4  | 92.0 |
| 06:59 | 3.6  | 92.0 |
| 07:00 | 3.9  | 92.0 |
| 07:01 | 4.1  | 92.0 |
| 07:02 | 4.3  | 92.0 |
| 07:03 | 4.6  | 91.9 |
| 07:04 | 4.8  | 91.9 |
| 07:05 | 5.1  | 91.9 |
| 07:06 | 5.3  | 91.9 |
| 07:07 | 5.6  | 91.9 |
| 07:08 | 5.8  | 91.9 |
| 07:09 | 6.0  | 91.9 |
| 07:10 | 6.3  | 91.9 |
| 07:11 | 6.5  | 91.9 |
| 07:12 | 6.8  | 91.9 |
| 07:13 | 7.0  | 91.9 |
| 07:14 | 7.3  | 91.9 |
| 07:15 | 7.5  | 91.8 |
| 07:16 | 7.8  | 91.8 |
| 07:17 | 8.0  | 91.8 |
| 07:18 | 8.3  | 91.8 |
| 07:19 | 8.5  | 91.8 |
| 07:20 | 8.8  | 91.8 |
| 07:21 | 9.0  | 91.8 |
| 07:22 | 9.2  | 91.8 |
| 07:23 | 9.5  | 91.8 |
| 07:24 | 9.7  | 91.8 |
| 07:25 | 10.0 | 91.8 |
| 07:26 | 10.2 | 91.8 |
| 07:27 | 10.5 | 91.8 |
| 07:28 | 10.7 | 91.7 |
| 07:29 | 11.0 | 91.7 |
| 07:30 | 11.2 | 91.7 |
| 07:31 | 11.5 | 91.7 |
| 07:32 | 11.7 | 91.7 |
| 07:33 | 12.0 | 91.7 |
| 07:34 | 12.2 | 91.7 |
| 07:35 | 12.5 | 91.7 |
| 07:36 | 12.7 | 91.7 |
| 07:37 | 13.0 | 91.7 |
| 07:38 | 13.2 | 91.7 |
| 07:39 | 13.5 | 91.7 |

|       |      |      |
|-------|------|------|
| 07:40 | 13.7 | 91.7 |
| 07:41 | 14.0 | 91.6 |
| 07:42 | 14.2 | 91.6 |
| 07:43 | 14.5 | 91.6 |
| 07:44 | 14.7 | 91.6 |
| 07:45 | 15.0 | 91.6 |
| 07:46 | 15.2 | 91.6 |
| 07:47 | 15.5 | 91.6 |
| 07:48 | 15.7 | 91.6 |
| 07:49 | 16.0 | 91.6 |
| 07:50 | 16.2 | 91.6 |
| 07:51 | 16.5 | 91.6 |
| 07:52 | 16.7 | 91.6 |
| 07:53 | 16.9 | 91.6 |
| 07:54 | 17.2 | 91.6 |
| 07:55 | 17.4 | 91.5 |
| 07:56 | 17.7 | 91.5 |
| 07:57 | 17.9 | 91.5 |
| 07:58 | 18.2 | 91.5 |
| 07:59 | 18.4 | 91.5 |
| 08:00 | 18.7 | 91.5 |
| 08:01 | 18.9 | 91.5 |
| 08:02 | 19.2 | 91.5 |
| 08:03 | 19.4 | 91.5 |
| 08:04 | 19.7 | 91.5 |
| 08:05 | 19.9 | 91.5 |
| 08:06 | 20.2 | 91.5 |
| 08:07 | 20.4 | 91.5 |
| 08:08 | 20.7 | 91.5 |
| 08:09 | 20.9 | 91.4 |
| 08:10 | 21.2 | 91.4 |
| 08:11 | 21.4 | 91.4 |
| 08:12 | 21.7 | 91.4 |
| 08:13 | 21.9 | 91.4 |
| 08:14 | 22.2 | 91.4 |
| 08:15 | 22.4 | 91.4 |
| 08:16 | 22.7 | 91.4 |
| 08:17 | 22.9 | 91.4 |
| 08:18 | 23.2 | 91.4 |
| 08:19 | 23.4 | 91.4 |
| 08:20 | 23.7 | 91.4 |
| 08:21 | 23.9 | 91.4 |
| 08:22 | 24.2 | 91.4 |
| 08:23 | 24.4 | 91.4 |
| 08:24 | 24.7 | 91.3 |
| 08:25 | 24.9 | 91.3 |
| 08:26 | 25.2 | 91.3 |
| 08:27 | 25.4 | 91.3 |
| 08:28 | 25.7 | 91.3 |
| 08:29 | 25.9 | 91.3 |
| 08:30 | 26.2 | 91.3 |
| 08:31 | 26.4 | 91.3 |
| 08:32 | 26.7 | 91.3 |
| 08:33 | 26.9 | 91.3 |
| 08:34 | 27.2 | 91.3 |
| 08:35 | 27.4 | 91.3 |
| 08:36 | 27.7 | 91.3 |
| 08:37 | 27.9 | 91.3 |
| 08:38 | 28.2 | 91.3 |
| 08:39 | 28.4 | 91.3 |
| 08:40 | 28.7 | 91.2 |

|       |      |      |
|-------|------|------|
| 08:41 | 28.9 | 91.2 |
| 08:42 | 29.2 | 91.2 |
| 08:43 | 29.4 | 91.2 |
| 08:44 | 29.7 | 91.2 |
| 08:45 | 29.9 | 91.2 |
| 08:46 | 30.2 | 91.2 |
| 08:47 | 30.4 | 91.2 |
| 08:48 | 30.7 | 91.2 |
| 08:49 | 30.9 | 91.2 |
| 08:50 | 31.2 | 91.2 |
| 08:51 | 31.4 | 91.2 |
| 08:52 | 31.7 | 91.2 |
| 08:53 | 31.9 | 91.2 |
| 08:54 | 32.2 | 91.2 |
| 08:55 | 32.4 | 91.2 |
| 08:56 | 32.7 | 91.1 |
| 08:57 | 32.9 | 91.1 |
| 08:58 | 33.2 | 91.1 |
| 08:59 | 33.4 | 91.1 |
| 09:00 | 33.7 | 91.1 |
| 09:01 | 33.9 | 91.1 |
| 09:02 | 34.2 | 91.1 |
| 09:03 | 34.4 | 91.1 |
| 09:04 | 34.7 | 91.1 |
| 09:05 | 34.9 | 91.1 |
| 09:06 | 35.2 | 91.1 |
| 09:07 | 35.4 | 91.1 |
| 09:08 | 35.7 | 91.1 |
| 09:09 | 35.9 | 91.1 |
| 09:10 | 36.2 | 91.1 |
| 09:11 | 36.4 | 91.1 |
| 09:12 | 36.7 | 91.0 |
| 09:13 | 36.9 | 91.0 |
| 09:14 | 37.2 | 91.0 |
| 09:15 | 37.4 | 91.0 |
| 09:16 | 37.7 | 91.0 |
| 09:17 | 37.9 | 91.0 |
| 09:18 | 38.2 | 91.0 |
| 09:19 | 38.4 | 91.0 |
| 09:20 | 38.7 | 91.0 |
| 09:21 | 38.9 | 91.0 |
| 09:22 | 39.2 | 91.0 |
| 09:23 | 39.4 | 91.0 |
| 09:24 | 39.6 | 91.0 |
| 09:25 | 39.9 | 91.0 |
| 09:26 | 40.1 | 91.0 |
| 09:27 | 40.4 | 91.0 |
| 09:28 | 40.6 | 91.0 |
| 09:29 | 40.9 | 91.0 |
| 09:30 | 41.1 | 90.9 |
| 09:31 | 41.4 | 90.9 |
| 09:32 | 41.6 | 90.9 |
| 09:33 | 41.9 | 90.9 |
| 09:34 | 42.1 | 90.9 |
| 09:35 | 42.4 | 90.9 |
| 09:36 | 42.6 | 90.9 |
| 09:37 | 42.9 | 90.9 |
| 09:38 | 43.1 | 90.9 |
| 09:39 | 43.4 | 90.9 |
| 09:40 | 43.6 | 90.9 |
| 09:41 | 43.9 | 90.9 |

|       |      |      |
|-------|------|------|
| 09:42 | 44.1 | 90.9 |
| 09:43 | 44.4 | 90.9 |
| 09:44 | 44.6 | 90.9 |
| 09:45 | 44.9 | 90.9 |
| 09:46 | 45.1 | 90.9 |
| 09:47 | 45.4 | 90.8 |
| 09:48 | 45.6 | 90.8 |
| 09:49 | 45.9 | 90.8 |
| 09:50 | 46.1 | 90.8 |
| 09:51 | 46.4 | 90.8 |
| 09:52 | 46.6 | 90.8 |
| 09:53 | 46.9 | 90.8 |
| 09:54 | 47.1 | 90.8 |
| 09:55 | 47.4 | 90.8 |
| 09:56 | 47.6 | 90.8 |
| 09:57 | 47.9 | 90.8 |
| 09:58 | 48.1 | 90.8 |
| 09:59 | 48.4 | 90.8 |
| 10:00 | 48.6 | 90.8 |
| 10:01 | 48.9 | 90.8 |
| 10:02 | 49.1 | 90.8 |
| 10:03 | 49.4 | 90.8 |
| 10:04 | 49.6 | 90.8 |
| 10:05 | 49.9 | 90.7 |
| 10:06 | 50.1 | 90.7 |
| 10:07 | 50.4 | 90.7 |
| 10:08 | 50.6 | 90.7 |
| 10:09 | 50.9 | 90.7 |
| 10:10 | 51.1 | 90.7 |
| 10:11 | 51.4 | 90.7 |
| 10:12 | 51.6 | 90.7 |
| 10:13 | 51.9 | 90.7 |
| 10:14 | 52.1 | 90.7 |
| 10:15 | 52.4 | 90.7 |
| 10:16 | 52.6 | 90.7 |
| 10:17 | 52.9 | 90.7 |
| 10:18 | 53.1 | 90.7 |
| 10:19 | 53.4 | 90.7 |
| 10:20 | 53.6 | 90.7 |
| 10:21 | 53.9 | 90.7 |
| 10:22 | 54.1 | 90.7 |
| 10:23 | 54.4 | 90.7 |
| 10:24 | 54.6 | 90.6 |
| 10:25 | 54.9 | 90.6 |
| 10:26 | 55.1 | 90.6 |
| 10:27 | 55.4 | 90.6 |
| 10:28 | 55.6 | 90.6 |
| 10:29 | 55.9 | 90.6 |
| 10:30 | 56.1 | 90.6 |
| 10:31 | 56.4 | 90.6 |
| 10:32 | 56.6 | 90.6 |
| 10:33 | 56.9 | 90.6 |
| 10:34 | 57.1 | 90.6 |
| 10:35 | 57.4 | 90.6 |
| 10:36 | 57.6 | 90.6 |
| 10:37 | 57.9 | 90.6 |
| 10:38 | 58.1 | 90.6 |
| 10:39 | 58.4 | 90.6 |
| 10:40 | 58.6 | 90.6 |
| 10:41 | 58.9 | 90.6 |
| 10:42 | 59.1 | 90.5 |

|       |      |      |
|-------|------|------|
| 10:43 | 59.4 | 90.5 |
| 10:44 | 59.6 | 90.5 |
| 10:45 | 59.9 | 90.5 |
| 10:46 | 60.1 | 90.5 |
| 10:47 | 60.4 | 90.5 |
| 10:48 | 60.6 | 90.5 |
| 10:49 | 60.9 | 90.5 |
| 10:50 | 61.1 | 90.5 |
| 10:51 | 61.4 | 90.5 |
| 10:52 | 61.6 | 90.5 |
| 10:53 | 61.9 | 90.5 |
| 10:54 | 62.1 | 90.5 |
| 10:55 | 62.4 | 90.5 |
| 10:56 | 62.6 | 90.5 |
| 10:57 | 62.9 | 90.5 |
| 10:58 | 63.1 | 90.5 |
| 10:59 | 63.4 | 90.5 |
| 11:00 | 63.6 | 90.4 |
| 11:01 | 63.9 | 90.4 |
| 11:02 | 64.1 | 90.4 |
| 11:03 | 64.4 | 90.4 |
| 11:04 | 64.6 | 90.4 |
| 11:05 | 64.9 | 90.4 |
| 11:06 | 65.1 | 90.4 |
| 11:07 | 65.4 | 90.4 |
| 11:08 | 65.6 | 90.4 |
| 11:09 | 65.9 | 90.4 |
| 11:10 | 66.1 | 90.4 |
| 11:11 | 66.4 | 90.4 |
| 11:12 | 66.6 | 90.4 |
| 11:13 | 66.9 | 90.4 |
| 11:14 | 67.1 | 90.4 |
| 11:15 | 67.4 | 90.4 |
| 11:16 | 67.6 | 90.4 |
| 11:17 | 67.9 | 90.4 |
| 11:18 | 68.1 | 90.3 |
| 11:19 | 68.4 | 90.3 |
| 11:20 | 68.6 | 90.3 |
| 11:21 | 68.9 | 90.3 |
| 11:22 | 69.1 | 90.3 |
| 11:23 | 69.4 | 90.3 |
| 11:24 | 69.6 | 90.3 |
| 11:25 | 69.9 | 90.3 |
| 11:26 | 70.1 | 90.3 |
| 11:27 | 70.4 | 90.3 |
| 11:28 | 70.6 | 90.3 |
| 11:29 | 70.9 | 90.3 |
| 11:30 | 71.1 | 90.3 |
| 11:31 | 71.4 | 90.3 |
| 11:32 | 71.6 | 90.3 |
| 11:33 | 71.9 | 90.3 |
| 11:34 | 72.1 | 90.2 |
| 11:35 | 72.4 | 90.2 |
| 11:36 | 72.6 | 90.2 |
| 11:37 | 72.9 | 90.2 |
| 11:38 | 73.1 | 90.2 |
| 11:39 | 73.4 | 90.2 |
| 11:40 | 73.6 | 90.2 |
| 11:41 | 73.9 | 90.2 |
| 11:42 | 74.1 | 90.2 |
| 11:43 | 74.4 | 90.2 |



|       |      |      |
|-------|------|------|
| 11:44 | 74.6 | 90.2 |
| 11:45 | 74.9 | 90.2 |
| 11:46 | 75.1 | 90.2 |
| 11:47 | 75.4 | 90.2 |
| 11:48 | 75.6 | 90.1 |
| 11:49 | 75.9 | 90.1 |
| 11:50 | 76.1 | 90.1 |
| 11:51 | 76.4 | 90.1 |
| 11:52 | 76.6 | 90.1 |
| 11:53 | 76.9 | 90.1 |
| 11:54 | 77.1 | 90.1 |
| 11:55 | 77.4 | 90.1 |
| 11:56 | 77.6 | 90.1 |
| 11:57 | 77.9 | 90.1 |
| 11:58 | 78.1 | 90.1 |
| 11:59 | 78.4 | 90.1 |
| 12:00 | 78.6 | 90.0 |
| 12:01 | 78.9 | 90.0 |
| 12:02 | 79.1 | 90.0 |
| 12:03 | 79.4 | 90.0 |
| 12:04 | 79.6 | 90.0 |
| 12:05 | 79.9 | 90.0 |
| 12:06 | 80.1 | 90.0 |
| 12:07 | 80.4 | 90.0 |
| 12:08 | 80.6 | 90.0 |
| 12:09 | 80.9 | 90.0 |
| 12:10 | 81.1 | 89.9 |
| 12:11 | 81.4 | 89.9 |
| 12:12 | 81.6 | 89.9 |
| 12:13 | 81.9 | 89.9 |
| 12:14 | 82.1 | 89.9 |
| 12:15 | 82.4 | 89.9 |
| 12:16 | 82.6 | 89.9 |
| 12:17 | 82.9 | 89.8 |
| 12:18 | 83.1 | 89.8 |
| 12:19 | 83.4 | 89.8 |
| 12:20 | 83.6 | 89.8 |
| 12:21 | 83.9 | 89.8 |
| 12:22 | 84.1 | 89.7 |
| 12:23 | 84.4 | 89.7 |
| 12:24 | 84.6 | 89.7 |
| 12:25 | 84.9 | 89.7 |
| 12:26 | 85.1 | 89.6 |
| 12:27 | 85.4 | 89.6 |
| 12:28 | 85.6 | 89.6 |
| 12:29 | 85.9 | 89.5 |
| 12:30 | 86.1 | 89.5 |
| 12:31 | 86.4 | 89.4 |
| 12:32 | 86.6 | 89.4 |
| 12:33 | 86.9 | 89.3 |
| 12:34 | 87.1 | 89.3 |
| 12:35 | 87.4 | 89.2 |
| 12:36 | 87.6 | 89.1 |
| 12:37 | 87.9 | 88.9 |
| 12:38 | 88.1 | 88.8 |
| 12:39 | 88.4 | 88.6 |
| 12:40 | 88.6 | 88.3 |
| 12:41 | 88.9 | 87.9 |
| 12:42 | 89.1 | 87.3 |
| 12:43 | 89.4 | 86.2 |
| 12:44 | 89.6 | 83.8 |

|       |      |       |
|-------|------|-------|
| 12:45 | 89.9 | 73.2  |
| 12:46 | 89.9 | 292.3 |
| 12:47 | 89.6 | 277.0 |
| 12:48 | 89.4 | 274.2 |
| 12:49 | 89.1 | 273.0 |
| 12:50 | 88.9 | 272.3 |
| 12:51 | 88.6 | 271.9 |
| 12:52 | 88.4 | 271.6 |
| 12:53 | 88.1 | 271.4 |
| 12:54 | 87.9 | 271.2 |
| 12:55 | 87.6 | 271.1 |
| 12:56 | 87.4 | 271.0 |
| 12:57 | 87.1 | 270.9 |
| 12:58 | 86.9 | 270.8 |
| 12:59 | 86.6 | 270.7 |
| 13:00 | 86.4 | 270.7 |
| 13:01 | 86.1 | 270.6 |
| 13:02 | 85.9 | 270.6 |
| 13:03 | 85.6 | 270.6 |
| 13:04 | 85.4 | 270.5 |
| 13:05 | 85.1 | 270.5 |
| 13:06 | 84.9 | 270.5 |
| 13:07 | 84.6 | 270.4 |
| 13:08 | 84.4 | 270.4 |
| 13:09 | 84.1 | 270.4 |
| 13:10 | 83.9 | 270.4 |
| 13:11 | 83.6 | 270.3 |
| 13:12 | 83.4 | 270.3 |
| 13:13 | 83.1 | 270.3 |
| 13:14 | 82.9 | 270.3 |
| 13:15 | 82.6 | 270.3 |
| 13:16 | 82.4 | 270.3 |
| 13:17 | 82.1 | 270.2 |
| 13:18 | 81.9 | 270.2 |
| 13:19 | 81.6 | 270.2 |
| 13:20 | 81.4 | 270.2 |
| 13:21 | 81.1 | 270.2 |
| 13:22 | 80.9 | 270.2 |
| 13:23 | 80.6 | 270.2 |
| 13:24 | 80.4 | 270.2 |
| 13:25 | 80.2 | 270.1 |
| 13:26 | 79.9 | 270.1 |
| 13:27 | 79.7 | 270.1 |
| 13:28 | 79.4 | 270.1 |
| 13:29 | 79.2 | 270.1 |
| 13:30 | 78.9 | 270.1 |
| 13:31 | 78.7 | 270.1 |
| 13:32 | 78.4 | 270.1 |
| 13:33 | 78.2 | 270.1 |
| 13:34 | 77.9 | 270.1 |
| 13:35 | 77.7 | 270.0 |
| 13:36 | 77.4 | 270.0 |
| 13:37 | 77.2 | 270.0 |
| 13:38 | 76.9 | 270.0 |
| 13:39 | 76.7 | 270.0 |
| 13:40 | 76.4 | 270.0 |
| 13:41 | 76.2 | 270.0 |
| 13:42 | 75.9 | 270.0 |
| 13:43 | 75.7 | 270.0 |
| 13:44 | 75.4 | 270.0 |
| 13:45 | 75.2 | 270.0 |

|       |      |       |
|-------|------|-------|
| 13:46 | 74.9 | 270.0 |
| 13:47 | 74.7 | 270.0 |
| 13:48 | 74.4 | 269.9 |
| 13:49 | 74.2 | 269.9 |
| 13:50 | 73.9 | 269.9 |
| 13:51 | 73.7 | 269.9 |
| 13:52 | 73.4 | 269.9 |
| 13:53 | 73.2 | 269.9 |
| 13:54 | 72.9 | 269.9 |
| 13:55 | 72.7 | 269.9 |
| 13:56 | 72.4 | 269.9 |
| 13:57 | 72.2 | 269.9 |
| 13:58 | 71.9 | 269.9 |
| 13:59 | 71.7 | 269.9 |
| 14:00 | 71.4 | 269.9 |
| 14:01 | 71.2 | 269.9 |
| 14:02 | 70.9 | 269.9 |
| 14:03 | 70.7 | 269.8 |
| 14:04 | 70.4 | 269.8 |
| 14:05 | 70.2 | 269.8 |
| 14:06 | 69.9 | 269.8 |
| 14:07 | 69.7 | 269.8 |
| 14:08 | 69.4 | 269.8 |
| 14:09 | 69.2 | 269.8 |
| 14:10 | 68.9 | 269.8 |
| 14:11 | 68.7 | 269.8 |
| 14:12 | 68.4 | 269.8 |
| 14:13 | 68.2 | 269.8 |
| 14:14 | 67.9 | 269.8 |
| 14:15 | 67.7 | 269.8 |
| 14:16 | 67.4 | 269.8 |
| 14:17 | 67.2 | 269.8 |
| 14:18 | 66.9 | 269.8 |
| 14:19 | 66.7 | 269.8 |
| 14:20 | 66.4 | 269.7 |
| 14:21 | 66.2 | 269.7 |
| 14:22 | 65.9 | 269.7 |
| 14:23 | 65.7 | 269.7 |
| 14:24 | 65.4 | 269.7 |
| 14:25 | 65.2 | 269.7 |
| 14:26 | 64.9 | 269.7 |
| 14:27 | 64.7 | 269.7 |
| 14:28 | 64.4 | 269.7 |
| 14:29 | 64.2 | 269.7 |
| 14:30 | 63.9 | 269.7 |
| 14:31 | 63.7 | 269.7 |
| 14:32 | 63.4 | 269.7 |
| 14:33 | 63.2 | 269.7 |
| 14:34 | 62.9 | 269.7 |
| 14:35 | 62.7 | 269.7 |
| 14:36 | 62.4 | 269.7 |
| 14:37 | 62.2 | 269.7 |
| 14:38 | 61.9 | 269.6 |
| 14:39 | 61.7 | 269.6 |
| 14:40 | 61.4 | 269.6 |
| 14:41 | 61.2 | 269.6 |
| 14:42 | 60.9 | 269.6 |
| 14:43 | 60.7 | 269.6 |
| 14:44 | 60.4 | 269.6 |
| 14:45 | 60.2 | 269.6 |
| 14:46 | 59.9 | 269.6 |

|       |      |       |
|-------|------|-------|
| 14:47 | 59.7 | 269.6 |
| 14:48 | 59.4 | 269.6 |
| 14:49 | 59.2 | 269.6 |
| 14:50 | 58.9 | 269.6 |
| 14:51 | 58.7 | 269.6 |
| 14:52 | 58.4 | 269.6 |
| 14:53 | 58.2 | 269.6 |
| 14:54 | 57.9 | 269.6 |
| 14:55 | 57.7 | 269.6 |
| 14:56 | 57.4 | 269.5 |
| 14:57 | 57.2 | 269.5 |
| 14:58 | 56.9 | 269.5 |
| 14:59 | 56.7 | 269.5 |
| 15:00 | 56.4 | 269.5 |
| 15:01 | 56.2 | 269.5 |
| 15:02 | 55.9 | 269.5 |
| 15:03 | 55.7 | 269.5 |
| 15:04 | 55.4 | 269.5 |
| 15:05 | 55.2 | 269.5 |
| 15:06 | 54.9 | 269.5 |
| 15:07 | 54.7 | 269.5 |
| 15:08 | 54.4 | 269.5 |
| 15:09 | 54.2 | 269.5 |
| 15:10 | 53.9 | 269.5 |
| 15:11 | 53.7 | 269.5 |
| 15:12 | 53.4 | 269.5 |
| 15:13 | 53.2 | 269.5 |
| 15:14 | 52.9 | 269.5 |
| 15:15 | 52.7 | 269.4 |
| 15:16 | 52.4 | 269.4 |
| 15:17 | 52.2 | 269.4 |
| 15:18 | 51.9 | 269.4 |
| 15:19 | 51.7 | 269.4 |
| 15:20 | 51.4 | 269.4 |
| 15:21 | 51.2 | 269.4 |
| 15:22 | 50.9 | 269.4 |
| 15:23 | 50.7 | 269.4 |
| 15:24 | 50.4 | 269.4 |
| 15:25 | 50.2 | 269.4 |
| 15:26 | 49.9 | 269.4 |
| 15:27 | 49.7 | 269.4 |
| 15:28 | 49.4 | 269.4 |
| 15:29 | 49.2 | 269.4 |
| 15:30 | 48.9 | 269.4 |
| 15:31 | 48.7 | 269.4 |
| 15:32 | 48.4 | 269.4 |
| 15:33 | 48.2 | 269.4 |
| 15:34 | 47.9 | 269.3 |
| 15:35 | 47.7 | 269.3 |
| 15:36 | 47.4 | 269.3 |
| 15:37 | 47.2 | 269.3 |
| 15:38 | 46.9 | 269.3 |
| 15:39 | 46.7 | 269.3 |
| 15:40 | 46.4 | 269.3 |
| 15:41 | 46.2 | 269.3 |
| 15:42 | 45.9 | 269.3 |
| 15:43 | 45.7 | 269.3 |
| 15:44 | 45.4 | 269.3 |
| 15:45 | 45.2 | 269.3 |
| 15:46 | 44.9 | 269.3 |
| 15:47 | 44.7 | 269.3 |

|       |      |       |
|-------|------|-------|
| 15:48 | 44.4 | 269.3 |
| 15:49 | 44.2 | 269.3 |
| 15:50 | 43.9 | 269.3 |
| 15:51 | 43.7 | 269.3 |
| 15:52 | 43.4 | 269.2 |
| 15:53 | 43.2 | 269.2 |
| 15:54 | 42.9 | 269.2 |
| 15:55 | 42.7 | 269.2 |
| 15:56 | 42.4 | 269.2 |
| 15:57 | 42.2 | 269.2 |
| 15:58 | 41.9 | 269.2 |
| 15:59 | 41.7 | 269.2 |
| 16:00 | 41.4 | 269.2 |
| 16:01 | 41.2 | 269.2 |
| 16:02 | 40.9 | 269.2 |
| 16:03 | 40.7 | 269.2 |
| 16:04 | 40.4 | 269.2 |
| 16:05 | 40.2 | 269.2 |
| 16:06 | 39.9 | 269.2 |
| 16:07 | 39.7 | 269.2 |
| 16:08 | 39.4 | 269.2 |
| 16:09 | 39.2 | 269.2 |
| 16:10 | 38.9 | 269.1 |
| 16:11 | 38.7 | 269.1 |
| 16:12 | 38.4 | 269.1 |
| 16:13 | 38.2 | 269.1 |
| 16:14 | 37.9 | 269.1 |
| 16:15 | 37.7 | 269.1 |
| 16:16 | 37.4 | 269.1 |
| 16:17 | 37.2 | 269.1 |
| 16:18 | 36.9 | 269.1 |
| 16:19 | 36.7 | 269.1 |
| 16:20 | 36.4 | 269.1 |
| 16:21 | 36.2 | 269.1 |
| 16:22 | 35.9 | 269.1 |
| 16:23 | 35.7 | 269.1 |
| 16:24 | 35.4 | 269.1 |
| 16:25 | 35.2 | 269.1 |
| 16:26 | 34.9 | 269.1 |
| 16:27 | 34.7 | 269.1 |
| 16:28 | 34.4 | 269.0 |
| 16:29 | 34.2 | 269.0 |
| 16:30 | 33.9 | 269.0 |
| 16:31 | 33.7 | 269.0 |
| 16:32 | 33.4 | 269.0 |
| 16:33 | 33.2 | 269.0 |
| 16:34 | 32.9 | 269.0 |
| 16:35 | 32.7 | 269.0 |
| 16:36 | 32.4 | 269.0 |
| 16:37 | 32.2 | 269.0 |
| 16:38 | 31.9 | 269.0 |
| 16:39 | 31.7 | 269.0 |
| 16:40 | 31.4 | 269.0 |
| 16:41 | 31.2 | 269.0 |
| 16:42 | 30.9 | 269.0 |
| 16:43 | 30.7 | 269.0 |
| 16:44 | 30.4 | 269.0 |
| 16:45 | 30.2 | 268.9 |
| 16:46 | 29.9 | 268.9 |
| 16:47 | 29.7 | 268.9 |
| 16:48 | 29.4 | 268.9 |

|       |      |       |
|-------|------|-------|
| 16:49 | 29.2 | 268.9 |
| 16:50 | 29.0 | 268.9 |
| 16:51 | 28.7 | 268.9 |
| 16:52 | 28.5 | 268.9 |
| 16:53 | 28.2 | 268.9 |
| 16:54 | 28.0 | 268.9 |
| 16:55 | 27.7 | 268.9 |
| 16:56 | 27.5 | 268.9 |
| 16:57 | 27.2 | 268.9 |
| 16:58 | 27.0 | 268.9 |
| 16:59 | 26.7 | 268.9 |
| 17:00 | 26.5 | 268.9 |
| 17:01 | 26.2 | 268.8 |
| 17:02 | 26.0 | 268.8 |
| 17:03 | 25.7 | 268.8 |
| 17:04 | 25.5 | 268.8 |
| 17:05 | 25.2 | 268.8 |
| 17:06 | 25.0 | 268.8 |
| 17:07 | 24.7 | 268.8 |
| 17:08 | 24.5 | 268.8 |
| 17:09 | 24.2 | 268.8 |
| 17:10 | 24.0 | 268.8 |
| 17:11 | 23.7 | 268.8 |
| 17:12 | 23.5 | 268.8 |
| 17:13 | 23.2 | 268.8 |
| 17:14 | 23.0 | 268.8 |
| 17:15 | 22.7 | 268.8 |
| 17:16 | 22.5 | 268.8 |
| 17:17 | 22.2 | 268.7 |
| 17:18 | 22.0 | 268.7 |
| 17:19 | 21.7 | 268.7 |
| 17:20 | 21.5 | 268.7 |
| 17:21 | 21.2 | 268.7 |
| 17:22 | 21.0 | 268.7 |
| 17:23 | 20.7 | 268.7 |
| 17:24 | 20.5 | 268.7 |
| 17:25 | 20.2 | 268.7 |
| 17:26 | 20.0 | 268.7 |
| 17:27 | 19.7 | 268.7 |
| 17:28 | 19.5 | 268.7 |
| 17:29 | 19.2 | 268.7 |
| 17:30 | 19.0 | 268.7 |
| 17:31 | 18.7 | 268.7 |
| 17:32 | 18.5 | 268.7 |
| 17:33 | 18.2 | 268.6 |
| 17:34 | 18.0 | 268.6 |
| 17:35 | 17.7 | 268.6 |
| 17:36 | 17.5 | 268.6 |
| 17:37 | 17.2 | 268.6 |
| 17:38 | 17.0 | 268.6 |
| 17:39 | 16.7 | 268.6 |
| 17:40 | 16.5 | 268.6 |
| 17:41 | 16.2 | 268.6 |
| 17:42 | 16.0 | 268.6 |
| 17:43 | 15.7 | 268.6 |
| 17:44 | 15.5 | 268.6 |
| 17:45 | 15.2 | 268.6 |
| 17:46 | 15.0 | 268.6 |
| 17:47 | 14.7 | 268.5 |
| 17:48 | 14.5 | 268.5 |
| 17:49 | 14.2 | 268.5 |

|       |      |       |
|-------|------|-------|
| 17:50 | 14.0 | 268.5 |
| 17:51 | 13.7 | 268.5 |
| 17:52 | 13.5 | 268.5 |
| 17:53 | 13.3 | 268.5 |
| 17:54 | 13.0 | 268.5 |
| 17:55 | 12.8 | 268.5 |
| 17:56 | 12.5 | 268.5 |
| 17:57 | 12.3 | 268.5 |
| 17:58 | 12.0 | 268.5 |
| 17:59 | 11.8 | 268.5 |
| 18:00 | 11.5 | 268.5 |
| 18:01 | 11.3 | 268.4 |
| 18:02 | 11.0 | 268.4 |
| 18:03 | 10.8 | 268.4 |
| 18:04 | 10.5 | 268.4 |
| 18:05 | 10.3 | 268.4 |
| 18:06 | 10.0 | 268.4 |
| 18:07 | 9.8  | 268.4 |
| 18:08 | 9.5  | 268.4 |
| 18:09 | 9.3  | 268.4 |
| 18:10 | 9.0  | 268.4 |
| 18:11 | 8.8  | 268.4 |
| 18:12 | 8.5  | 268.4 |
| 18:13 | 8.3  | 268.4 |
| 18:14 | 8.0  | 268.3 |
| 18:15 | 7.8  | 268.3 |
| 18:16 | 7.6  | 268.3 |
| 18:17 | 7.3  | 268.3 |
| 18:18 | 7.1  | 268.3 |
| 18:19 | 6.8  | 268.3 |
| 18:20 | 6.6  | 268.3 |
| 18:21 | 6.3  | 268.3 |
| 18:22 | 6.1  | 268.3 |
| 18:23 | 5.8  | 268.3 |
| 18:24 | 5.6  | 268.3 |
| 18:25 | 5.3  | 268.3 |
| 18:26 | 5.1  | 268.3 |
| 18:27 | 4.9  | 268.2 |
| 18:28 | 4.6  | 268.2 |
| 18:29 | 4.4  | 268.2 |
| 18:30 | 4.1  | 268.2 |
| 18:31 | 3.9  | 268.2 |
| 18:32 | 3.6  | 268.2 |
| 18:33 | 3.4  | 268.2 |
| 18:34 | 3.2  | 268.2 |
| 18:35 | 2.9  | 268.2 |
| 18:36 | 2.7  | 268.2 |
| 18:37 | 2.5  | 268.2 |
| 18:38 | 2.2  | 268.2 |
| 18:39 | 2.0  | 268.1 |
| 18:40 | 1.8  | 268.1 |
| 18:41 | 1.5  | 268.1 |
| 18:42 | 1.3  | 268.1 |
| 18:43 | 1.1  | 268.1 |
| 18:44 | 0.9  | 268.1 |
| 18:45 | 0.6  | 268.1 |
| 18:46 | 0.4  | 268.1 |
| 18:47 | 0.2  | 268.1 |
| 18:48 | 0.0  | 268.1 |
| 18:49 | -0.8 | 268.1 |
| 18:50 | -1.1 | 268.1 |

|       |       |       |
|-------|-------|-------|
| 18:51 | -1.3  | 268.0 |
| 18:52 | -1.6  | 268.0 |
| 18:53 | -1.8  | 268.0 |
| 18:54 | -2.1  | 268.0 |
| 18:55 | -2.3  | 268.0 |
| 18:56 | -2.6  | 268.0 |
| 18:57 | -2.8  | 268.0 |
| 18:58 | -3.1  | 268.0 |
| 18:59 | -3.3  | 268.0 |
| 19:00 | -3.6  | 268.0 |
| 19:01 | -3.8  | 268.0 |
| 19:02 | -4.1  | 267.9 |
| 19:03 | -4.3  | 267.9 |
| 19:04 | -4.6  | 267.9 |
| 19:05 | -4.8  | 267.9 |
| 19:06 | -5.1  | 267.9 |
| 19:07 | -5.3  | 267.9 |
| 19:08 | -5.6  | 267.9 |
| 19:09 | -5.8  | 267.9 |
| 19:10 | -6.1  | 267.9 |
| 19:11 | -6.3  | 267.9 |
| 19:12 | -6.6  | 267.9 |
| 19:13 | -6.8  | 267.8 |
| 19:14 | -7.1  | 267.8 |
| 19:15 | -7.3  | 267.8 |
| 19:16 | -7.6  | 267.8 |
| 19:17 | -7.8  | 267.8 |
| 19:18 | -8.0  | 267.8 |
| 19:19 | -8.3  | 267.8 |
| 19:20 | -8.5  | 267.8 |
| 19:21 | -8.8  | 267.8 |
| 19:22 | -9.0  | 267.8 |
| 19:23 | -9.3  | 267.7 |
| 19:24 | -9.5  | 267.7 |
| 19:25 | -9.8  | 267.7 |
| 19:26 | -10.0 | 267.7 |
| 19:27 | -10.3 | 267.7 |
| 19:28 | -10.5 | 267.7 |
| 19:29 | -10.8 | 267.7 |
| 19:30 | -11.0 | 267.7 |
| 19:31 | -11.3 | 267.7 |
| 19:32 | -11.5 | 267.6 |
| 19:33 | -11.8 | 267.6 |

[Back to form](#)



Astronomical Applications Dept.  
U.S. Naval Observatory  
Washington, DC 20392-5420

° , ° ,  
W 54 10, S 2 03

Altitude and Azimuth of the Sun  
Jun 21, 2010

Zone: 3h West of Greenwich

|       | Altitude | Azimuth  |
|-------|----------|----------|
|       |          | (E of N) |
| h m   | o        | o        |
| 05:50 | -11.9    | 66.5     |
| 05:51 | -11.7    | 66.5     |
| 05:52 | -11.5    | 66.5     |
| 05:53 | -11.2    | 66.5     |
| 05:54 | -11.0    | 66.5     |
| 05:55 | -10.8    | 66.5     |
| 05:56 | -10.5    | 66.5     |
| 05:57 | -10.3    | 66.5     |
| 05:58 | -10.1    | 66.6     |
| 05:59 | -9.9     | 66.6     |
| 06:00 | -9.6     | 66.6     |
| 06:01 | -9.4     | 66.6     |
| 06:02 | -9.2     | 66.6     |
| 06:03 | -8.9     | 66.6     |
| 06:04 | -8.7     | 66.6     |
| 06:05 | -8.5     | 66.6     |
| 06:06 | -8.3     | 66.6     |
| 06:07 | -8.0     | 66.6     |
| 06:08 | -7.8     | 66.6     |
| 06:09 | -7.6     | 66.6     |
| 06:10 | -7.3     | 66.6     |
| 06:11 | -7.1     | 66.6     |
| 06:12 | -6.9     | 66.6     |
| 06:13 | -6.6     | 66.6     |
| 06:14 | -6.4     | 66.6     |
| 06:15 | -6.2     | 66.6     |
| 06:16 | -6.0     | 66.6     |
| 06:17 | -5.7     | 66.6     |
| 06:18 | -5.5     | 66.6     |
| 06:19 | -5.3     | 66.6     |
| 06:20 | -5.0     | 66.6     |
| 06:21 | -4.8     | 66.6     |
| 06:22 | -4.6     | 66.6     |
| 06:23 | -4.4     | 66.6     |
| 06:24 | -4.1     | 66.6     |
| 06:25 | -3.9     | 66.6     |
| 06:26 | -3.7     | 66.6     |
| 06:27 | -3.4     | 66.6     |
| 06:28 | -3.2     | 66.6     |
| 06:29 | -3.0     | 66.6     |
| 06:30 | -2.7     | 66.6     |

|       |      |      |
|-------|------|------|
| 06:31 | -2.5 | 66.6 |
| 06:32 | -2.3 | 66.6 |
| 06:33 | -2.1 | 66.6 |
| 06:34 | -1.8 | 66.6 |
| 06:35 | -1.6 | 66.6 |
| 06:36 | -1.4 | 66.6 |
| 06:37 | -1.1 | 66.6 |
| 06:38 | -0.9 | 66.6 |
| 06:39 | -0.1 | 66.6 |
| 06:40 | 0.1  | 66.6 |
| 06:41 | 0.3  | 66.6 |
| 06:42 | 0.5  | 66.5 |
| 06:43 | 0.7  | 66.5 |
| 06:44 | 0.9  | 66.5 |
| 06:45 | 1.1  | 66.5 |
| 06:46 | 1.3  | 66.5 |
| 06:47 | 1.5  | 66.5 |
| 06:48 | 1.7  | 66.5 |
| 06:49 | 1.9  | 66.5 |
| 06:50 | 2.1  | 66.5 |
| 06:51 | 2.3  | 66.4 |
| 06:52 | 2.6  | 66.4 |
| 06:53 | 2.8  | 66.4 |
| 06:54 | 3.0  | 66.4 |
| 06:55 | 3.2  | 66.4 |
| 06:56 | 3.4  | 66.4 |
| 06:57 | 3.6  | 66.4 |
| 06:58 | 3.9  | 66.4 |
| 06:59 | 4.1  | 66.3 |
| 07:00 | 4.3  | 66.3 |
| 07:01 | 4.5  | 66.3 |
| 07:02 | 4.8  | 66.3 |
| 07:03 | 5.0  | 66.3 |
| 07:04 | 5.2  | 66.3 |
| 07:05 | 5.4  | 66.2 |
| 07:06 | 5.6  | 66.2 |
| 07:07 | 5.9  | 66.2 |
| 07:08 | 6.1  | 66.2 |
| 07:09 | 6.3  | 66.2 |
| 07:10 | 6.5  | 66.1 |
| 07:11 | 6.8  | 66.1 |
| 07:12 | 7.0  | 66.1 |
| 07:13 | 7.2  | 66.1 |
| 07:14 | 7.4  | 66.1 |
| 07:15 | 7.7  | 66.0 |
| 07:16 | 7.9  | 66.0 |
| 07:17 | 8.1  | 66.0 |
| 07:18 | 8.3  | 66.0 |
| 07:19 | 8.6  | 65.9 |
| 07:20 | 8.8  | 65.9 |
| 07:21 | 9.0  | 65.9 |
| 07:22 | 9.2  | 65.9 |
| 07:23 | 9.5  | 65.8 |
| 07:24 | 9.7  | 65.8 |
| 07:25 | 9.9  | 65.8 |
| 07:26 | 10.1 | 65.8 |
| 07:27 | 10.4 | 65.7 |
| 07:28 | 10.6 | 65.7 |
| 07:29 | 10.8 | 65.7 |
| 07:30 | 11.1 | 65.6 |
| 07:31 | 11.3 | 65.6 |

|       |      |      |
|-------|------|------|
| 07:32 | 11.5 | 65.6 |
| 07:33 | 11.7 | 65.6 |
| 07:34 | 12.0 | 65.5 |
| 07:35 | 12.2 | 65.5 |
| 07:36 | 12.4 | 65.5 |
| 07:37 | 12.6 | 65.4 |
| 07:38 | 12.9 | 65.4 |
| 07:39 | 13.1 | 65.4 |
| 07:40 | 13.3 | 65.3 |
| 07:41 | 13.5 | 65.3 |
| 07:42 | 13.8 | 65.3 |
| 07:43 | 14.0 | 65.2 |
| 07:44 | 14.2 | 65.2 |
| 07:45 | 14.4 | 65.2 |
| 07:46 | 14.7 | 65.1 |
| 07:47 | 14.9 | 65.1 |
| 07:48 | 15.1 | 65.1 |
| 07:49 | 15.3 | 65.0 |
| 07:50 | 15.6 | 65.0 |
| 07:51 | 15.8 | 64.9 |
| 07:52 | 16.0 | 64.9 |
| 07:53 | 16.2 | 64.9 |
| 07:54 | 16.5 | 64.8 |
| 07:55 | 16.7 | 64.8 |
| 07:56 | 16.9 | 64.7 |
| 07:57 | 17.1 | 64.7 |
| 07:58 | 17.4 | 64.7 |
| 07:59 | 17.6 | 64.6 |
| 08:00 | 17.8 | 64.6 |
| 08:01 | 18.0 | 64.5 |
| 08:02 | 18.3 | 64.5 |
| 08:03 | 18.5 | 64.4 |
| 08:04 | 18.7 | 64.4 |
| 08:05 | 18.9 | 64.3 |
| 08:06 | 19.2 | 64.3 |
| 08:07 | 19.4 | 64.3 |
| 08:08 | 19.6 | 64.2 |
| 08:09 | 19.8 | 64.2 |
| 08:10 | 20.1 | 64.1 |
| 08:11 | 20.3 | 64.1 |
| 08:12 | 20.5 | 64.0 |
| 08:13 | 20.7 | 64.0 |
| 08:14 | 21.0 | 63.9 |
| 08:15 | 21.2 | 63.9 |
| 08:16 | 21.4 | 63.8 |
| 08:17 | 21.6 | 63.8 |
| 08:18 | 21.9 | 63.7 |
| 08:19 | 22.1 | 63.6 |
| 08:20 | 22.3 | 63.6 |
| 08:21 | 22.5 | 63.5 |
| 08:22 | 22.8 | 63.5 |
| 08:23 | 23.0 | 63.4 |
| 08:24 | 23.2 | 63.4 |
| 08:25 | 23.4 | 63.3 |
| 08:26 | 23.6 | 63.3 |
| 08:27 | 23.9 | 63.2 |
| 08:28 | 24.1 | 63.1 |
| 08:29 | 24.3 | 63.1 |
| 08:30 | 24.5 | 63.0 |
| 08:31 | 24.8 | 63.0 |
| 08:32 | 25.0 | 62.9 |

|       |      |      |
|-------|------|------|
| 08:33 | 25.2 | 62.8 |
| 08:34 | 25.4 | 62.8 |
| 08:35 | 25.6 | 62.7 |
| 08:36 | 25.9 | 62.6 |
| 08:37 | 26.1 | 62.6 |
| 08:38 | 26.3 | 62.5 |
| 08:39 | 26.5 | 62.4 |
| 08:40 | 26.7 | 62.4 |
| 08:41 | 27.0 | 62.3 |
| 08:42 | 27.2 | 62.2 |
| 08:43 | 27.4 | 62.2 |
| 08:44 | 27.6 | 62.1 |
| 08:45 | 27.9 | 62.0 |
| 08:46 | 28.1 | 62.0 |
| 08:47 | 28.3 | 61.9 |
| 08:48 | 28.5 | 61.8 |
| 08:49 | 28.7 | 61.7 |
| 08:50 | 29.0 | 61.7 |
| 08:51 | 29.2 | 61.6 |
| 08:52 | 29.4 | 61.5 |
| 08:53 | 29.6 | 61.4 |
| 08:54 | 29.8 | 61.4 |
| 08:55 | 30.0 | 61.3 |
| 08:56 | 30.3 | 61.2 |
| 08:57 | 30.5 | 61.1 |
| 08:58 | 30.7 | 61.1 |
| 08:59 | 30.9 | 61.0 |
| 09:00 | 31.1 | 60.9 |
| 09:01 | 31.4 | 60.8 |
| 09:02 | 31.6 | 60.7 |
| 09:03 | 31.8 | 60.6 |
| 09:04 | 32.0 | 60.6 |
| 09:05 | 32.2 | 60.5 |
| 09:06 | 32.4 | 60.4 |
| 09:07 | 32.7 | 60.3 |
| 09:08 | 32.9 | 60.2 |
| 09:09 | 33.1 | 60.1 |
| 09:10 | 33.3 | 60.0 |
| 09:11 | 33.5 | 59.9 |
| 09:12 | 33.7 | 59.8 |
| 09:13 | 34.0 | 59.7 |
| 09:14 | 34.2 | 59.7 |
| 09:15 | 34.4 | 59.6 |
| 09:16 | 34.6 | 59.5 |
| 09:17 | 34.8 | 59.4 |
| 09:18 | 35.0 | 59.3 |
| 09:19 | 35.2 | 59.2 |
| 09:20 | 35.5 | 59.1 |
| 09:21 | 35.7 | 59.0 |
| 09:22 | 35.9 | 58.9 |
| 09:23 | 36.1 | 58.8 |
| 09:24 | 36.3 | 58.7 |
| 09:25 | 36.5 | 58.6 |
| 09:26 | 36.7 | 58.4 |
| 09:27 | 37.0 | 58.3 |
| 09:28 | 37.2 | 58.2 |
| 09:29 | 37.4 | 58.1 |
| 09:30 | 37.6 | 58.0 |
| 09:31 | 37.8 | 57.9 |
| 09:32 | 38.0 | 57.8 |
| 09:33 | 38.2 | 57.7 |

|       |      |      |
|-------|------|------|
| 09:34 | 38.4 | 57.6 |
| 09:35 | 38.6 | 57.4 |
| 09:36 | 38.9 | 57.3 |
| 09:37 | 39.1 | 57.2 |
| 09:38 | 39.3 | 57.1 |
| 09:39 | 39.5 | 57.0 |
| 09:40 | 39.7 | 56.8 |
| 09:41 | 39.9 | 56.7 |
| 09:42 | 40.1 | 56.6 |
| 09:43 | 40.3 | 56.5 |
| 09:44 | 40.5 | 56.4 |
| 09:45 | 40.7 | 56.2 |
| 09:46 | 40.9 | 56.1 |
| 09:47 | 41.2 | 56.0 |
| 09:48 | 41.4 | 55.8 |
| 09:49 | 41.6 | 55.7 |
| 09:50 | 41.8 | 55.6 |
| 09:51 | 42.0 | 55.4 |
| 09:52 | 42.2 | 55.3 |
| 09:53 | 42.4 | 55.2 |
| 09:54 | 42.6 | 55.0 |
| 09:55 | 42.8 | 54.9 |
| 09:56 | 43.0 | 54.7 |
| 09:57 | 43.2 | 54.6 |
| 09:58 | 43.4 | 54.4 |
| 09:59 | 43.6 | 54.3 |
| 10:00 | 43.8 | 54.1 |
| 10:01 | 44.0 | 54.0 |
| 10:02 | 44.2 | 53.8 |
| 10:03 | 44.4 | 53.7 |
| 10:04 | 44.6 | 53.5 |
| 10:05 | 44.8 | 53.4 |
| 10:06 | 45.0 | 53.2 |
| 10:07 | 45.2 | 53.1 |
| 10:08 | 45.4 | 52.9 |
| 10:09 | 45.6 | 52.7 |
| 10:10 | 45.8 | 52.6 |
| 10:11 | 46.0 | 52.4 |
| 10:12 | 46.2 | 52.2 |
| 10:13 | 46.4 | 52.1 |
| 10:14 | 46.6 | 51.9 |
| 10:15 | 46.8 | 51.7 |
| 10:16 | 47.0 | 51.6 |
| 10:17 | 47.2 | 51.4 |
| 10:18 | 47.4 | 51.2 |
| 10:19 | 47.6 | 51.0 |
| 10:20 | 47.8 | 50.8 |
| 10:21 | 48.0 | 50.7 |
| 10:22 | 48.2 | 50.5 |
| 10:23 | 48.4 | 50.3 |
| 10:24 | 48.5 | 50.1 |
| 10:25 | 48.7 | 49.9 |
| 10:26 | 48.9 | 49.7 |
| 10:27 | 49.1 | 49.5 |
| 10:28 | 49.3 | 49.3 |
| 10:29 | 49.5 | 49.1 |
| 10:30 | 49.7 | 48.9 |
| 10:31 | 49.9 | 48.7 |
| 10:32 | 50.1 | 48.5 |
| 10:33 | 50.2 | 48.3 |
| 10:34 | 50.4 | 48.1 |

|       |      |      |
|-------|------|------|
| 10:35 | 50.6 | 47.9 |
| 10:36 | 50.8 | 47.7 |
| 10:37 | 51.0 | 47.4 |
| 10:38 | 51.2 | 47.2 |
| 10:39 | 51.4 | 47.0 |
| 10:40 | 51.5 | 46.8 |
| 10:41 | 51.7 | 46.6 |
| 10:42 | 51.9 | 46.3 |
| 10:43 | 52.1 | 46.1 |
| 10:44 | 52.3 | 45.9 |
| 10:45 | 52.4 | 45.6 |
| 10:46 | 52.6 | 45.4 |
| 10:47 | 52.8 | 45.2 |
| 10:48 | 53.0 | 44.9 |
| 10:49 | 53.1 | 44.7 |
| 10:50 | 53.3 | 44.4 |
| 10:51 | 53.5 | 44.2 |
| 10:52 | 53.7 | 43.9 |
| 10:53 | 53.8 | 43.7 |
| 10:54 | 54.0 | 43.4 |
| 10:55 | 54.2 | 43.1 |
| 10:56 | 54.4 | 42.9 |
| 10:57 | 54.5 | 42.6 |
| 10:58 | 54.7 | 42.4 |
| 10:59 | 54.9 | 42.1 |
| 11:00 | 55.0 | 41.8 |
| 11:01 | 55.2 | 41.5 |
| 11:02 | 55.4 | 41.3 |
| 11:03 | 55.5 | 41.0 |
| 11:04 | 55.7 | 40.7 |
| 11:05 | 55.9 | 40.4 |
| 11:06 | 56.0 | 40.1 |
| 11:07 | 56.2 | 39.8 |
| 11:08 | 56.3 | 39.5 |
| 11:09 | 56.5 | 39.2 |
| 11:10 | 56.6 | 38.9 |
| 11:11 | 56.8 | 38.6 |
| 11:12 | 57.0 | 38.3 |
| 11:13 | 57.1 | 38.0 |
| 11:14 | 57.3 | 37.7 |
| 11:15 | 57.4 | 37.4 |
| 11:16 | 57.6 | 37.0 |
| 11:17 | 57.7 | 36.7 |
| 11:18 | 57.9 | 36.4 |
| 11:19 | 58.0 | 36.1 |
| 11:20 | 58.2 | 35.7 |
| 11:21 | 58.3 | 35.4 |
| 11:22 | 58.5 | 35.0 |
| 11:23 | 58.6 | 34.7 |
| 11:24 | 58.7 | 34.3 |
| 11:25 | 58.9 | 34.0 |
| 11:26 | 59.0 | 33.6 |
| 11:27 | 59.2 | 33.3 |
| 11:28 | 59.3 | 32.9 |
| 11:29 | 59.4 | 32.6 |
| 11:30 | 59.6 | 32.2 |
| 11:31 | 59.7 | 31.8 |
| 11:32 | 59.8 | 31.5 |
| 11:33 | 59.9 | 31.1 |
| 11:34 | 60.1 | 30.7 |
| 11:35 | 60.2 | 30.3 |

|       |      |      |
|-------|------|------|
| 11:36 | 60.3 | 29.9 |
| 11:37 | 60.5 | 29.5 |
| 11:38 | 60.6 | 29.1 |
| 11:39 | 60.7 | 28.7 |
| 11:40 | 60.8 | 28.3 |
| 11:41 | 60.9 | 27.9 |
| 11:42 | 61.1 | 27.5 |
| 11:43 | 61.2 | 27.1 |
| 11:44 | 61.3 | 26.7 |
| 11:45 | 61.4 | 26.3 |
| 11:46 | 61.5 | 25.9 |
| 11:47 | 61.6 | 25.4 |
| 11:48 | 61.7 | 25.0 |
| 11:49 | 61.8 | 24.6 |
| 11:50 | 61.9 | 24.1 |
| 11:51 | 62.0 | 23.7 |
| 11:52 | 62.1 | 23.3 |
| 11:53 | 62.2 | 22.8 |
| 11:54 | 62.3 | 22.4 |
| 11:55 | 62.4 | 21.9 |
| 11:56 | 62.5 | 21.5 |
| 11:57 | 62.6 | 21.0 |
| 11:58 | 62.7 | 20.6 |
| 11:59 | 62.8 | 20.1 |
| 12:00 | 62.9 | 19.6 |
| 12:01 | 62.9 | 19.2 |
| 12:02 | 63.0 | 18.7 |
| 12:03 | 63.1 | 18.2 |
| 12:04 | 63.2 | 17.7 |
| 12:05 | 63.2 | 17.3 |
| 12:06 | 63.3 | 16.8 |
| 12:07 | 63.4 | 16.3 |
| 12:08 | 63.5 | 15.8 |
| 12:09 | 63.5 | 15.3 |
| 12:10 | 63.6 | 14.8 |
| 12:11 | 63.7 | 14.3 |
| 12:12 | 63.7 | 13.8 |
| 12:13 | 63.8 | 13.3 |
| 12:14 | 63.8 | 12.8 |
| 12:15 | 63.9 | 12.3 |
| 12:16 | 63.9 | 11.8 |
| 12:17 | 64.0 | 11.3 |
| 12:18 | 64.0 | 10.8 |
| 12:19 | 64.1 | 10.3 |
| 12:20 | 64.1 | 9.7  |
| 12:21 | 64.2 | 9.2  |
| 12:22 | 64.2 | 8.7  |
| 12:23 | 64.2 | 8.2  |
| 12:24 | 64.3 | 7.7  |
| 12:25 | 64.3 | 7.1  |
| 12:26 | 64.3 | 6.6  |
| 12:27 | 64.4 | 6.1  |
| 12:28 | 64.4 | 5.6  |
| 12:29 | 64.4 | 5.0  |
| 12:30 | 64.4 | 4.5  |
| 12:31 | 64.5 | 4.0  |
| 12:32 | 64.5 | 3.5  |
| 12:33 | 64.5 | 2.9  |
| 12:34 | 64.5 | 2.4  |
| 12:35 | 64.5 | 1.9  |
| 12:36 | 64.5 | 1.3  |

|       |      |       |
|-------|------|-------|
| 12:37 | 64.5 | 0.8   |
| 12:38 | 64.5 | 0.3   |
| 12:39 | 64.5 | 359.7 |
| 12:40 | 64.5 | 359.2 |
| 12:41 | 64.5 | 358.7 |
| 12:42 | 64.5 | 358.1 |
| 12:43 | 64.5 | 357.6 |
| 12:44 | 64.5 | 357.1 |
| 12:45 | 64.5 | 356.5 |
| 12:46 | 64.5 | 356.0 |
| 12:47 | 64.4 | 355.5 |
| 12:48 | 64.4 | 354.9 |
| 12:49 | 64.4 | 354.4 |
| 12:50 | 64.4 | 353.9 |
| 12:51 | 64.3 | 353.4 |
| 12:52 | 64.3 | 352.8 |
| 12:53 | 64.3 | 352.3 |
| 12:54 | 64.2 | 351.8 |
| 12:55 | 64.2 | 351.3 |
| 12:56 | 64.2 | 350.8 |
| 12:57 | 64.1 | 350.2 |
| 12:58 | 64.1 | 349.7 |
| 12:59 | 64.0 | 349.2 |
| 13:00 | 64.0 | 348.7 |
| 13:01 | 63.9 | 348.2 |
| 13:02 | 63.9 | 347.7 |
| 13:03 | 63.8 | 347.2 |
| 13:04 | 63.8 | 346.7 |
| 13:05 | 63.7 | 346.2 |
| 13:06 | 63.7 | 345.7 |
| 13:07 | 63.6 | 345.2 |
| 13:08 | 63.5 | 344.7 |
| 13:09 | 63.5 | 344.2 |
| 13:10 | 63.4 | 343.7 |
| 13:11 | 63.3 | 343.2 |
| 13:12 | 63.2 | 342.7 |
| 13:13 | 63.2 | 342.2 |
| 13:14 | 63.1 | 341.8 |
| 13:15 | 63.0 | 341.3 |
| 13:16 | 62.9 | 340.8 |
| 13:17 | 62.9 | 340.4 |
| 13:18 | 62.8 | 339.9 |
| 13:19 | 62.7 | 339.4 |
| 13:20 | 62.6 | 339.0 |
| 13:21 | 62.5 | 338.5 |
| 13:22 | 62.4 | 338.1 |
| 13:23 | 62.3 | 337.6 |
| 13:24 | 62.2 | 337.2 |
| 13:25 | 62.1 | 336.7 |
| 13:26 | 62.0 | 336.3 |
| 13:27 | 61.9 | 335.8 |
| 13:28 | 61.8 | 335.4 |
| 13:29 | 61.7 | 335.0 |
| 13:30 | 61.6 | 334.5 |
| 13:31 | 61.5 | 334.1 |
| 13:32 | 61.4 | 333.7 |
| 13:33 | 61.3 | 333.3 |
| 13:34 | 61.2 | 332.9 |
| 13:35 | 61.0 | 332.5 |
| 13:36 | 60.9 | 332.0 |
| 13:37 | 60.8 | 331.6 |



|       |      |       |
|-------|------|-------|
| 13:38 | 60.7 | 331.2 |
| 13:39 | 60.6 | 330.8 |
| 13:40 | 60.4 | 330.5 |
| 13:41 | 60.3 | 330.1 |
| 13:42 | 60.2 | 329.7 |
| 13:43 | 60.1 | 329.3 |
| 13:44 | 59.9 | 328.9 |
| 13:45 | 59.8 | 328.5 |
| 13:46 | 59.7 | 328.2 |
| 13:47 | 59.6 | 327.8 |
| 13:48 | 59.4 | 327.4 |
| 13:49 | 59.3 | 327.1 |
| 13:50 | 59.1 | 326.7 |
| 13:51 | 59.0 | 326.3 |
| 13:52 | 58.9 | 326.0 |
| 13:53 | 58.7 | 325.6 |
| 13:54 | 58.6 | 325.3 |
| 13:55 | 58.4 | 324.9 |
| 13:56 | 58.3 | 324.6 |
| 13:57 | 58.2 | 324.3 |
| 13:58 | 58.0 | 323.9 |
| 13:59 | 57.9 | 323.6 |
| 14:00 | 57.7 | 323.3 |
| 14:01 | 57.6 | 323.0 |
| 14:02 | 57.4 | 322.6 |
| 14:03 | 57.3 | 322.3 |
| 14:04 | 57.1 | 322.0 |
| 14:05 | 57.0 | 321.7 |
| 14:06 | 56.8 | 321.4 |
| 14:07 | 56.6 | 321.1 |
| 14:08 | 56.5 | 320.8 |
| 14:09 | 56.3 | 320.5 |
| 14:10 | 56.2 | 320.2 |
| 14:11 | 56.0 | 319.9 |
| 14:12 | 55.8 | 319.6 |
| 14:13 | 55.7 | 319.3 |
| 14:14 | 55.5 | 319.0 |
| 14:15 | 55.4 | 318.7 |
| 14:16 | 55.2 | 318.5 |
| 14:17 | 55.0 | 318.2 |
| 14:18 | 54.9 | 317.9 |
| 14:19 | 54.7 | 317.6 |
| 14:20 | 54.5 | 317.4 |
| 14:21 | 54.4 | 317.1 |
| 14:22 | 54.2 | 316.8 |
| 14:23 | 54.0 | 316.6 |
| 14:24 | 53.8 | 316.3 |
| 14:25 | 53.7 | 316.1 |
| 14:26 | 53.5 | 315.8 |
| 14:27 | 53.3 | 315.6 |
| 14:28 | 53.1 | 315.3 |
| 14:29 | 53.0 | 315.1 |
| 14:30 | 52.8 | 314.8 |
| 14:31 | 52.6 | 314.6 |
| 14:32 | 52.4 | 314.4 |
| 14:33 | 52.3 | 314.1 |
| 14:34 | 52.1 | 313.9 |
| 14:35 | 51.9 | 313.7 |
| 14:36 | 51.7 | 313.4 |
| 14:37 | 51.5 | 313.2 |
| 14:38 | 51.3 | 313.0 |

|       |      |       |
|-------|------|-------|
| 14:39 | 51.2 | 312.8 |
| 14:40 | 51.0 | 312.5 |
| 14:41 | 50.8 | 312.3 |
| 14:42 | 50.6 | 312.1 |
| 14:43 | 50.4 | 311.9 |
| 14:44 | 50.2 | 311.7 |
| 14:45 | 50.1 | 311.5 |
| 14:46 | 49.9 | 311.3 |
| 14:47 | 49.7 | 311.1 |
| 14:48 | 49.5 | 310.9 |
| 14:49 | 49.3 | 310.7 |
| 14:50 | 49.1 | 310.5 |
| 14:51 | 48.9 | 310.3 |
| 14:52 | 48.7 | 310.1 |
| 14:53 | 48.5 | 309.9 |
| 14:54 | 48.3 | 309.7 |
| 14:55 | 48.2 | 309.5 |
| 14:56 | 48.0 | 309.3 |
| 14:57 | 47.8 | 309.2 |
| 14:58 | 47.6 | 309.0 |
| 14:59 | 47.4 | 308.8 |
| 15:00 | 47.2 | 308.6 |
| 15:01 | 47.0 | 308.4 |
| 15:02 | 46.8 | 308.3 |
| 15:03 | 46.6 | 308.1 |
| 15:04 | 46.4 | 307.9 |
| 15:05 | 46.2 | 307.8 |
| 15:06 | 46.0 | 307.6 |
| 15:07 | 45.8 | 307.4 |
| 15:08 | 45.6 | 307.3 |
| 15:09 | 45.4 | 307.1 |
| 15:10 | 45.2 | 306.9 |
| 15:11 | 45.0 | 306.8 |
| 15:12 | 44.8 | 306.6 |
| 15:13 | 44.6 | 306.5 |
| 15:14 | 44.4 | 306.3 |
| 15:15 | 44.2 | 306.2 |
| 15:16 | 44.0 | 306.0 |
| 15:17 | 43.8 | 305.9 |
| 15:18 | 43.6 | 305.7 |
| 15:19 | 43.4 | 305.6 |
| 15:20 | 43.2 | 305.4 |
| 15:21 | 43.0 | 305.3 |
| 15:22 | 42.8 | 305.1 |
| 15:23 | 42.6 | 305.0 |
| 15:24 | 42.4 | 304.8 |
| 15:25 | 42.2 | 304.7 |
| 15:26 | 42.0 | 304.6 |
| 15:27 | 41.8 | 304.4 |
| 15:28 | 41.6 | 304.3 |
| 15:29 | 41.4 | 304.2 |
| 15:30 | 41.1 | 304.0 |
| 15:31 | 40.9 | 303.9 |
| 15:32 | 40.7 | 303.8 |
| 15:33 | 40.5 | 303.6 |
| 15:34 | 40.3 | 303.5 |
| 15:35 | 40.1 | 303.4 |
| 15:36 | 39.9 | 303.3 |
| 15:37 | 39.7 | 303.1 |
| 15:38 | 39.5 | 303.0 |
| 15:39 | 39.3 | 302.9 |

|       |      |       |
|-------|------|-------|
| 15:40 | 39.1 | 302.8 |
| 15:41 | 38.9 | 302.7 |
| 15:42 | 38.6 | 302.5 |
| 15:43 | 38.4 | 302.4 |
| 15:44 | 38.2 | 302.3 |
| 15:45 | 38.0 | 302.2 |
| 15:46 | 37.8 | 302.1 |
| 15:47 | 37.6 | 302.0 |
| 15:48 | 37.4 | 301.9 |
| 15:49 | 37.2 | 301.8 |
| 15:50 | 36.9 | 301.7 |
| 15:51 | 36.7 | 301.5 |
| 15:52 | 36.5 | 301.4 |
| 15:53 | 36.3 | 301.3 |
| 15:54 | 36.1 | 301.2 |
| 15:55 | 35.9 | 301.1 |
| 15:56 | 35.7 | 301.0 |
| 15:57 | 35.5 | 300.9 |
| 15:58 | 35.2 | 300.8 |
| 15:59 | 35.0 | 300.7 |
| 16:00 | 34.8 | 300.6 |
| 16:01 | 34.6 | 300.5 |
| 16:02 | 34.4 | 300.4 |
| 16:03 | 34.2 | 300.3 |
| 16:04 | 34.0 | 300.2 |
| 16:05 | 33.7 | 300.2 |
| 16:06 | 33.5 | 300.1 |
| 16:07 | 33.3 | 300.0 |
| 16:08 | 33.1 | 299.9 |
| 16:09 | 32.9 | 299.8 |
| 16:10 | 32.7 | 299.7 |
| 16:11 | 32.4 | 299.6 |
| 16:12 | 32.2 | 299.5 |
| 16:13 | 32.0 | 299.4 |
| 16:14 | 31.8 | 299.4 |
| 16:15 | 31.6 | 299.3 |
| 16:16 | 31.4 | 299.2 |
| 16:17 | 31.1 | 299.1 |
| 16:18 | 30.9 | 299.0 |
| 16:19 | 30.7 | 298.9 |
| 16:20 | 30.5 | 298.9 |
| 16:21 | 30.3 | 298.8 |
| 16:22 | 30.0 | 298.7 |
| 16:23 | 29.8 | 298.6 |
| 16:24 | 29.6 | 298.6 |
| 16:25 | 29.4 | 298.5 |
| 16:26 | 29.2 | 298.4 |
| 16:27 | 28.9 | 298.3 |
| 16:28 | 28.7 | 298.3 |
| 16:29 | 28.5 | 298.2 |
| 16:30 | 28.3 | 298.1 |
| 16:31 | 28.1 | 298.0 |
| 16:32 | 27.8 | 298.0 |
| 16:33 | 27.6 | 297.9 |
| 16:34 | 27.4 | 297.8 |
| 16:35 | 27.2 | 297.8 |
| 16:36 | 27.0 | 297.7 |
| 16:37 | 26.7 | 297.6 |
| 16:38 | 26.5 | 297.6 |
| 16:39 | 26.3 | 297.5 |
| 16:40 | 26.1 | 297.4 |

|       |      |       |
|-------|------|-------|
| 16:41 | 25.9 | 297.4 |
| 16:42 | 25.6 | 297.3 |
| 16:43 | 25.4 | 297.2 |
| 16:44 | 25.2 | 297.2 |
| 16:45 | 25.0 | 297.1 |
| 16:46 | 24.7 | 297.0 |
| 16:47 | 24.5 | 297.0 |
| 16:48 | 24.3 | 296.9 |
| 16:49 | 24.1 | 296.9 |
| 16:50 | 23.9 | 296.8 |
| 16:51 | 23.6 | 296.7 |
| 16:52 | 23.4 | 296.7 |
| 16:53 | 23.2 | 296.6 |
| 16:54 | 23.0 | 296.6 |
| 16:55 | 22.7 | 296.5 |
| 16:56 | 22.5 | 296.5 |
| 16:57 | 22.3 | 296.4 |
| 16:58 | 22.1 | 296.4 |
| 16:59 | 21.8 | 296.3 |
| 17:00 | 21.6 | 296.2 |
| 17:01 | 21.4 | 296.2 |
| 17:02 | 21.2 | 296.1 |
| 17:03 | 21.0 | 296.1 |
| 17:04 | 20.7 | 296.0 |
| 17:05 | 20.5 | 296.0 |
| 17:06 | 20.3 | 295.9 |
| 17:07 | 20.1 | 295.9 |
| 17:08 | 19.8 | 295.8 |
| 17:09 | 19.6 | 295.8 |
| 17:10 | 19.4 | 295.7 |
| 17:11 | 19.2 | 295.7 |
| 17:12 | 18.9 | 295.7 |
| 17:13 | 18.7 | 295.6 |
| 17:14 | 18.5 | 295.6 |
| 17:15 | 18.3 | 295.5 |
| 17:16 | 18.0 | 295.5 |
| 17:17 | 17.8 | 295.4 |
| 17:18 | 17.6 | 295.4 |
| 17:19 | 17.4 | 295.3 |
| 17:20 | 17.1 | 295.3 |
| 17:21 | 16.9 | 295.3 |
| 17:22 | 16.7 | 295.2 |
| 17:23 | 16.5 | 295.2 |
| 17:24 | 16.2 | 295.1 |
| 17:25 | 16.0 | 295.1 |
| 17:26 | 15.8 | 295.1 |
| 17:27 | 15.6 | 295.0 |
| 17:28 | 15.3 | 295.0 |
| 17:29 | 15.1 | 294.9 |
| 17:30 | 14.9 | 294.9 |
| 17:31 | 14.7 | 294.9 |
| 17:32 | 14.4 | 294.8 |
| 17:33 | 14.2 | 294.8 |
| 17:34 | 14.0 | 294.8 |
| 17:35 | 13.8 | 294.7 |
| 17:36 | 13.5 | 294.7 |
| 17:37 | 13.3 | 294.7 |
| 17:38 | 13.1 | 294.6 |
| 17:39 | 12.9 | 294.6 |
| 17:40 | 12.6 | 294.6 |
| 17:41 | 12.4 | 294.5 |

|       |      |       |
|-------|------|-------|
| 17:42 | 12.2 | 294.5 |
| 17:43 | 11.9 | 294.5 |
| 17:44 | 11.7 | 294.4 |
| 17:45 | 11.5 | 294.4 |
| 17:46 | 11.3 | 294.4 |
| 17:47 | 11.0 | 294.4 |
| 17:48 | 10.8 | 294.3 |
| 17:49 | 10.6 | 294.3 |
| 17:50 | 10.4 | 294.3 |
| 17:51 | 10.1 | 294.2 |
| 17:52 | 9.9  | 294.2 |
| 17:53 | 9.7  | 294.2 |
| 17:54 | 9.5  | 294.2 |
| 17:55 | 9.2  | 294.1 |
| 17:56 | 9.0  | 294.1 |
| 17:57 | 8.8  | 294.1 |
| 17:58 | 8.6  | 294.1 |
| 17:59 | 8.3  | 294.0 |
| 18:00 | 8.1  | 294.0 |
| 18:01 | 7.9  | 294.0 |
| 18:02 | 7.7  | 294.0 |
| 18:03 | 7.4  | 293.9 |
| 18:04 | 7.2  | 293.9 |
| 18:05 | 7.0  | 293.9 |
| 18:06 | 6.8  | 293.9 |
| 18:07 | 6.5  | 293.9 |
| 18:08 | 6.3  | 293.8 |
| 18:09 | 6.1  | 293.8 |
| 18:10 | 5.9  | 293.8 |
| 18:11 | 5.6  | 293.8 |
| 18:12 | 5.4  | 293.8 |
| 18:13 | 5.2  | 293.7 |
| 18:14 | 5.0  | 293.7 |
| 18:15 | 4.7  | 293.7 |
| 18:16 | 4.5  | 293.7 |
| 18:17 | 4.3  | 293.7 |
| 18:18 | 4.1  | 293.7 |
| 18:19 | 3.9  | 293.6 |
| 18:20 | 3.6  | 293.6 |
| 18:21 | 3.4  | 293.6 |
| 18:22 | 3.2  | 293.6 |
| 18:23 | 3.0  | 293.6 |
| 18:24 | 2.8  | 293.6 |
| 18:25 | 2.5  | 293.6 |
| 18:26 | 2.3  | 293.6 |
| 18:27 | 2.1  | 293.5 |
| 18:28 | 1.9  | 293.5 |
| 18:29 | 1.7  | 293.5 |
| 18:30 | 1.5  | 293.5 |
| 18:31 | 1.3  | 293.5 |
| 18:32 | 1.1  | 293.5 |
| 18:33 | 0.9  | 293.5 |
| 18:34 | 0.7  | 293.5 |
| 18:35 | 0.5  | 293.5 |
| 18:36 | 0.3  | 293.4 |
| 18:37 | 0.1  | 293.4 |
| 18:38 | -0.1 | 293.4 |
| 18:39 | -0.9 | 293.4 |
| 18:40 | -1.2 | 293.4 |
| 18:41 | -1.4 | 293.4 |
| 18:42 | -1.6 | 293.4 |

|       |       |       |
|-------|-------|-------|
| 18:43 | -1.8  | 293.4 |
| 18:44 | -2.1  | 293.4 |
| 18:45 | -2.3  | 293.4 |
| 18:46 | -2.5  | 293.4 |
| 18:47 | -2.8  | 293.4 |
| 18:48 | -3.0  | 293.4 |
| 18:49 | -3.2  | 293.4 |
| 18:50 | -3.4  | 293.4 |
| 18:51 | -3.7  | 293.4 |
| 18:52 | -3.9  | 293.4 |
| 18:53 | -4.1  | 293.4 |
| 18:54 | -4.4  | 293.4 |
| 18:55 | -4.6  | 293.4 |
| 18:56 | -4.8  | 293.4 |
| 18:57 | -5.1  | 293.4 |
| 18:58 | -5.3  | 293.4 |
| 18:59 | -5.5  | 293.4 |
| 19:00 | -5.7  | 293.4 |
| 19:01 | -6.0  | 293.4 |
| 19:02 | -6.2  | 293.4 |
| 19:03 | -6.4  | 293.4 |
| 19:04 | -6.7  | 293.4 |
| 19:05 | -6.9  | 293.4 |
| 19:06 | -7.1  | 293.4 |
| 19:07 | -7.3  | 293.4 |
| 19:08 | -7.6  | 293.4 |
| 19:09 | -7.8  | 293.4 |
| 19:10 | -8.0  | 293.4 |
| 19:11 | -8.3  | 293.4 |
| 19:12 | -8.5  | 293.4 |
| 19:13 | -8.7  | 293.4 |
| 19:14 | -8.9  | 293.4 |
| 19:15 | -9.2  | 293.4 |
| 19:16 | -9.4  | 293.4 |
| 19:17 | -9.6  | 293.4 |
| 19:18 | -9.9  | 293.4 |
| 19:19 | -10.1 | 293.4 |
| 19:20 | -10.3 | 293.5 |
| 19:21 | -10.6 | 293.5 |
| 19:22 | -10.8 | 293.5 |
| 19:23 | -11.0 | 293.5 |
| 19:24 | -11.2 | 293.5 |
| 19:25 | -11.5 | 293.5 |
| 19:26 | -11.7 | 293.5 |
| 19:27 | -11.9 | 293.5 |

[Back to form](#)

Astronomical Applications Dept.  
U.S. Naval Observatory  
Washington, DC 20392-5420

° , ° ,  
W 54 10, S 2 03

Altitude and Azimuth of the Sun  
Sep 28, 2010

Zone: 3h West of Greenwich

|       | Altitude | Azimuth  |
|-------|----------|----------|
|       |          | (E of N) |
| h m   | °        | °        |
| 05:40 | -11.8    | 92.5     |
| 05:41 | -11.5    | 92.5     |
| 05:42 | -11.3    | 92.5     |
| 05:43 | -11.0    | 92.5     |
| 05:44 | -10.8    | 92.5     |
| 05:45 | -10.5    | 92.5     |
| 05:46 | -10.3    | 92.4     |
| 05:47 | -10.0    | 92.4     |
| 05:48 | -9.8     | 92.4     |
| 05:49 | -9.5     | 92.4     |
| 05:50 | -9.3     | 92.4     |
| 05:51 | -9.0     | 92.4     |
| 05:52 | -8.8     | 92.4     |
| 05:53 | -8.5     | 92.4     |
| 05:54 | -8.3     | 92.4     |
| 05:55 | -8.0     | 92.4     |
| 05:56 | -7.8     | 92.3     |
| 05:57 | -7.5     | 92.3     |
| 05:58 | -7.3     | 92.3     |
| 05:59 | -7.0     | 92.3     |
| 06:00 | -6.8     | 92.3     |
| 06:01 | -6.5     | 92.3     |
| 06:02 | -6.3     | 92.3     |
| 06:03 | -6.0     | 92.3     |
| 06:04 | -5.8     | 92.3     |
| 06:05 | -5.5     | 92.3     |
| 06:06 | -5.3     | 92.2     |
| 06:07 | -5.0     | 92.2     |
| 06:08 | -4.8     | 92.2     |
| 06:09 | -4.5     | 92.2     |
| 06:10 | -4.3     | 92.2     |
| 06:11 | -4.0     | 92.2     |
| 06:12 | -3.8     | 92.2     |
| 06:13 | -3.5     | 92.2     |
| 06:14 | -3.3     | 92.2     |
| 06:15 | -3.0     | 92.2     |
| 06:16 | -2.8     | 92.1     |
| 06:17 | -2.5     | 92.1     |
| 06:18 | -2.3     | 92.1     |
| 06:19 | -2.0     | 92.1     |
| 06:20 | -1.8     | 92.1     |

|       |      |      |
|-------|------|------|
| 06:21 | -1.5 | 92.1 |
| 06:22 | -1.3 | 92.1 |
| 06:23 | -1.0 | 92.1 |
| 06:24 | -0.8 | 92.1 |
| 06:25 | 0.0  | 92.1 |
| 06:26 | 0.2  | 92.1 |
| 06:27 | 0.5  | 92.1 |
| 06:28 | 0.7  | 92.0 |
| 06:29 | 0.9  | 92.0 |
| 06:30 | 1.1  | 92.0 |
| 06:31 | 1.3  | 92.0 |
| 06:32 | 1.6  | 92.0 |
| 06:33 | 1.8  | 92.0 |
| 06:34 | 2.0  | 92.0 |
| 06:35 | 2.3  | 92.0 |
| 06:36 | 2.5  | 92.0 |
| 06:37 | 2.7  | 92.0 |
| 06:38 | 3.0  | 92.0 |
| 06:39 | 3.2  | 91.9 |
| 06:40 | 3.4  | 91.9 |
| 06:41 | 3.7  | 91.9 |
| 06:42 | 3.9  | 91.9 |
| 06:43 | 4.2  | 91.9 |
| 06:44 | 4.4  | 91.9 |
| 06:45 | 4.6  | 91.9 |
| 06:46 | 4.9  | 91.9 |
| 06:47 | 5.1  | 91.9 |
| 06:48 | 5.4  | 91.9 |
| 06:49 | 5.6  | 91.9 |
| 06:50 | 5.9  | 91.9 |
| 06:51 | 6.1  | 91.9 |
| 06:52 | 6.4  | 91.8 |
| 06:53 | 6.6  | 91.8 |
| 06:54 | 6.8  | 91.8 |
| 06:55 | 7.1  | 91.8 |
| 06:56 | 7.3  | 91.8 |
| 06:57 | 7.6  | 91.8 |
| 06:58 | 7.8  | 91.8 |
| 06:59 | 8.1  | 91.8 |
| 07:00 | 8.3  | 91.8 |
| 07:01 | 8.6  | 91.8 |
| 07:02 | 8.8  | 91.8 |
| 07:03 | 9.1  | 91.8 |
| 07:04 | 9.3  | 91.8 |
| 07:05 | 9.6  | 91.7 |
| 07:06 | 9.8  | 91.7 |
| 07:07 | 10.1 | 91.7 |
| 07:08 | 10.3 | 91.7 |
| 07:09 | 10.6 | 91.7 |
| 07:10 | 10.8 | 91.7 |
| 07:11 | 11.0 | 91.7 |
| 07:12 | 11.3 | 91.7 |
| 07:13 | 11.5 | 91.7 |
| 07:14 | 11.8 | 91.7 |
| 07:15 | 12.0 | 91.7 |
| 07:16 | 12.3 | 91.7 |
| 07:17 | 12.5 | 91.7 |
| 07:18 | 12.8 | 91.7 |
| 07:19 | 13.0 | 91.6 |
| 07:20 | 13.3 | 91.6 |
| 07:21 | 13.5 | 91.6 |



|       |      |      |
|-------|------|------|
| 07:22 | 13.8 | 91.6 |
| 07:23 | 14.0 | 91.6 |
| 07:24 | 14.3 | 91.6 |
| 07:25 | 14.5 | 91.6 |
| 07:26 | 14.8 | 91.6 |
| 07:27 | 15.0 | 91.6 |
| 07:28 | 15.3 | 91.6 |
| 07:29 | 15.5 | 91.6 |
| 07:30 | 15.8 | 91.6 |
| 07:31 | 16.0 | 91.6 |
| 07:32 | 16.3 | 91.6 |
| 07:33 | 16.5 | 91.5 |
| 07:34 | 16.8 | 91.5 |
| 07:35 | 17.0 | 91.5 |
| 07:36 | 17.3 | 91.5 |
| 07:37 | 17.5 | 91.5 |
| 07:38 | 17.8 | 91.5 |
| 07:39 | 18.0 | 91.5 |
| 07:40 | 18.3 | 91.5 |
| 07:41 | 18.5 | 91.5 |
| 07:42 | 18.8 | 91.5 |
| 07:43 | 19.0 | 91.5 |
| 07:44 | 19.3 | 91.5 |
| 07:45 | 19.5 | 91.5 |
| 07:46 | 19.8 | 91.5 |
| 07:47 | 20.0 | 91.5 |
| 07:48 | 20.3 | 91.5 |
| 07:49 | 20.5 | 91.4 |
| 07:50 | 20.8 | 91.4 |
| 07:51 | 21.0 | 91.4 |
| 07:52 | 21.2 | 91.4 |
| 07:53 | 21.5 | 91.4 |
| 07:54 | 21.7 | 91.4 |
| 07:55 | 22.0 | 91.4 |
| 07:56 | 22.2 | 91.4 |
| 07:57 | 22.5 | 91.4 |
| 07:58 | 22.7 | 91.4 |
| 07:59 | 23.0 | 91.4 |
| 08:00 | 23.2 | 91.4 |
| 08:01 | 23.5 | 91.4 |
| 08:02 | 23.7 | 91.4 |
| 08:03 | 24.0 | 91.4 |
| 08:04 | 24.2 | 91.4 |
| 08:05 | 24.5 | 91.3 |
| 08:06 | 24.7 | 91.3 |
| 08:07 | 25.0 | 91.3 |
| 08:08 | 25.2 | 91.3 |
| 08:09 | 25.5 | 91.3 |
| 08:10 | 25.7 | 91.3 |
| 08:11 | 26.0 | 91.3 |
| 08:12 | 26.2 | 91.3 |
| 08:13 | 26.5 | 91.3 |
| 08:14 | 26.7 | 91.3 |
| 08:15 | 27.0 | 91.3 |
| 08:16 | 27.2 | 91.3 |
| 08:17 | 27.5 | 91.3 |
| 08:18 | 27.7 | 91.3 |
| 08:19 | 28.0 | 91.3 |
| 08:20 | 28.2 | 91.3 |
| 08:21 | 28.5 | 91.3 |
| 08:22 | 28.7 | 91.2 |

|       |      |      |
|-------|------|------|
| 08:23 | 29.0 | 91.2 |
| 08:24 | 29.2 | 91.2 |
| 08:25 | 29.5 | 91.2 |
| 08:26 | 29.7 | 91.2 |
| 08:27 | 30.0 | 91.2 |
| 08:28 | 30.2 | 91.2 |
| 08:29 | 30.5 | 91.2 |
| 08:30 | 30.7 | 91.2 |
| 08:31 | 31.0 | 91.2 |
| 08:32 | 31.2 | 91.2 |
| 08:33 | 31.5 | 91.2 |
| 08:34 | 31.7 | 91.2 |
| 08:35 | 32.0 | 91.2 |
| 08:36 | 32.2 | 91.2 |
| 08:37 | 32.5 | 91.2 |
| 08:38 | 32.7 | 91.2 |
| 08:39 | 33.0 | 91.2 |
| 08:40 | 33.2 | 91.1 |
| 08:41 | 33.5 | 91.1 |
| 08:42 | 33.7 | 91.1 |
| 08:43 | 34.0 | 91.1 |
| 08:44 | 34.2 | 91.1 |
| 08:45 | 34.5 | 91.1 |
| 08:46 | 34.7 | 91.1 |
| 08:47 | 35.0 | 91.1 |
| 08:48 | 35.2 | 91.1 |
| 08:49 | 35.5 | 91.1 |
| 08:50 | 35.7 | 91.1 |
| 08:51 | 36.0 | 91.1 |
| 08:52 | 36.2 | 91.1 |
| 08:53 | 36.5 | 91.1 |
| 08:54 | 36.7 | 91.1 |
| 08:55 | 37.0 | 91.1 |
| 08:56 | 37.2 | 91.1 |
| 08:57 | 37.5 | 91.1 |
| 08:58 | 37.7 | 91.1 |
| 08:59 | 38.0 | 91.1 |
| 09:00 | 38.2 | 91.0 |
| 09:01 | 38.5 | 91.0 |
| 09:02 | 38.7 | 91.0 |
| 09:03 | 39.0 | 91.0 |
| 09:04 | 39.2 | 91.0 |
| 09:05 | 39.5 | 91.0 |
| 09:06 | 39.7 | 91.0 |
| 09:07 | 40.0 | 91.0 |
| 09:08 | 40.2 | 91.0 |
| 09:09 | 40.5 | 91.0 |
| 09:10 | 40.7 | 91.0 |
| 09:11 | 41.0 | 91.0 |
| 09:12 | 41.2 | 91.0 |
| 09:13 | 41.5 | 91.0 |
| 09:14 | 41.7 | 91.0 |
| 09:15 | 42.0 | 91.0 |
| 09:16 | 42.2 | 91.0 |
| 09:17 | 42.5 | 91.0 |
| 09:18 | 42.7 | 91.0 |
| 09:19 | 43.0 | 91.0 |
| 09:20 | 43.2 | 90.9 |
| 09:21 | 43.5 | 90.9 |
| 09:22 | 43.7 | 90.9 |
| 09:23 | 44.0 | 90.9 |

|       |      |      |
|-------|------|------|
| 09:24 | 44.2 | 90.9 |
| 09:25 | 44.5 | 90.9 |
| 09:26 | 44.7 | 90.9 |
| 09:27 | 45.0 | 90.9 |
| 09:28 | 45.2 | 90.9 |
| 09:29 | 45.5 | 90.9 |
| 09:30 | 45.7 | 90.9 |
| 09:31 | 46.0 | 90.9 |
| 09:32 | 46.2 | 90.9 |
| 09:33 | 46.5 | 90.9 |
| 09:34 | 46.7 | 90.9 |
| 09:35 | 47.0 | 90.9 |
| 09:36 | 47.2 | 90.9 |
| 09:37 | 47.5 | 90.9 |
| 09:38 | 47.7 | 90.9 |
| 09:39 | 48.0 | 90.9 |
| 09:40 | 48.2 | 90.9 |
| 09:41 | 48.5 | 90.9 |
| 09:42 | 48.7 | 90.9 |
| 09:43 | 49.0 | 90.8 |
| 09:44 | 49.2 | 90.8 |
| 09:45 | 49.5 | 90.8 |
| 09:46 | 49.7 | 90.8 |
| 09:47 | 50.0 | 90.8 |
| 09:48 | 50.2 | 90.8 |
| 09:49 | 50.5 | 90.8 |
| 09:50 | 50.7 | 90.8 |
| 09:51 | 51.0 | 90.8 |
| 09:52 | 51.2 | 90.8 |
| 09:53 | 51.5 | 90.8 |
| 09:54 | 51.7 | 90.8 |
| 09:55 | 52.0 | 90.8 |
| 09:56 | 52.2 | 90.8 |
| 09:57 | 52.5 | 90.8 |
| 09:58 | 52.7 | 90.8 |
| 09:59 | 53.0 | 90.8 |
| 10:00 | 53.2 | 90.8 |
| 10:01 | 53.5 | 90.8 |
| 10:02 | 53.7 | 90.8 |
| 10:03 | 54.0 | 90.8 |
| 10:04 | 54.2 | 90.8 |
| 10:05 | 54.5 | 90.8 |
| 10:06 | 54.7 | 90.8 |
| 10:07 | 54.9 | 90.7 |
| 10:08 | 55.2 | 90.7 |
| 10:09 | 55.4 | 90.7 |
| 10:10 | 55.7 | 90.7 |
| 10:11 | 55.9 | 90.7 |
| 10:12 | 56.2 | 90.7 |
| 10:13 | 56.4 | 90.7 |
| 10:14 | 56.7 | 90.7 |
| 10:15 | 56.9 | 90.7 |
| 10:16 | 57.2 | 90.7 |
| 10:17 | 57.4 | 90.7 |
| 10:18 | 57.7 | 90.7 |
| 10:19 | 57.9 | 90.7 |
| 10:20 | 58.2 | 90.7 |
| 10:21 | 58.4 | 90.7 |
| 10:22 | 58.7 | 90.7 |
| 10:23 | 58.9 | 90.7 |
| 10:24 | 59.2 | 90.7 |

|       |      |      |
|-------|------|------|
| 10:25 | 59.4 | 90.7 |
| 10:26 | 59.7 | 90.7 |
| 10:27 | 59.9 | 90.7 |
| 10:28 | 60.2 | 90.7 |
| 10:29 | 60.4 | 90.7 |
| 10:30 | 60.7 | 90.7 |
| 10:31 | 60.9 | 90.7 |
| 10:32 | 61.2 | 90.7 |
| 10:33 | 61.4 | 90.7 |
| 10:34 | 61.7 | 90.7 |
| 10:35 | 61.9 | 90.7 |
| 10:36 | 62.2 | 90.6 |
| 10:37 | 62.4 | 90.6 |
| 10:38 | 62.7 | 90.6 |
| 10:39 | 62.9 | 90.6 |
| 10:40 | 63.2 | 90.6 |
| 10:41 | 63.4 | 90.6 |
| 10:42 | 63.7 | 90.6 |
| 10:43 | 63.9 | 90.6 |
| 10:44 | 64.2 | 90.6 |
| 10:45 | 64.4 | 90.6 |
| 10:46 | 64.7 | 90.6 |
| 10:47 | 64.9 | 90.6 |
| 10:48 | 65.2 | 90.6 |
| 10:49 | 65.4 | 90.6 |
| 10:50 | 65.7 | 90.6 |
| 10:51 | 65.9 | 90.6 |
| 10:52 | 66.2 | 90.6 |
| 10:53 | 66.4 | 90.6 |
| 10:54 | 66.7 | 90.6 |
| 10:55 | 66.9 | 90.6 |
| 10:56 | 67.2 | 90.6 |
| 10:57 | 67.4 | 90.6 |
| 10:58 | 67.7 | 90.6 |
| 10:59 | 67.9 | 90.6 |
| 11:00 | 68.2 | 90.6 |
| 11:01 | 68.4 | 90.6 |
| 11:02 | 68.7 | 90.6 |
| 11:03 | 68.9 | 90.6 |
| 11:04 | 69.2 | 90.6 |
| 11:05 | 69.4 | 90.6 |
| 11:06 | 69.7 | 90.6 |
| 11:07 | 69.9 | 90.6 |
| 11:08 | 70.2 | 90.6 |
| 11:09 | 70.4 | 90.6 |
| 11:10 | 70.7 | 90.6 |
| 11:11 | 70.9 | 90.6 |
| 11:12 | 71.2 | 90.6 |
| 11:13 | 71.4 | 90.6 |
| 11:14 | 71.7 | 90.6 |
| 11:15 | 71.9 | 90.6 |
| 11:16 | 72.2 | 90.6 |
| 11:17 | 72.4 | 90.6 |
| 11:18 | 72.7 | 90.6 |
| 11:19 | 72.9 | 90.6 |
| 11:20 | 73.2 | 90.6 |
| 11:21 | 73.4 | 90.6 |
| 11:22 | 73.7 | 90.6 |
| 11:23 | 73.9 | 90.6 |
| 11:24 | 74.2 | 90.6 |
| 11:25 | 74.4 | 90.6 |

|       |      |       |
|-------|------|-------|
| 11:26 | 74.7 | 90.6  |
| 11:27 | 74.9 | 90.6  |
| 11:28 | 75.2 | 90.6  |
| 11:29 | 75.4 | 90.6  |
| 11:30 | 75.7 | 90.6  |
| 11:31 | 75.9 | 90.6  |
| 11:32 | 76.2 | 90.6  |
| 11:33 | 76.4 | 90.6  |
| 11:34 | 76.7 | 90.6  |
| 11:35 | 76.9 | 90.6  |
| 11:36 | 77.2 | 90.6  |
| 11:37 | 77.4 | 90.6  |
| 11:38 | 77.7 | 90.6  |
| 11:39 | 77.9 | 90.6  |
| 11:40 | 78.2 | 90.6  |
| 11:41 | 78.4 | 90.6  |
| 11:42 | 78.7 | 90.6  |
| 11:43 | 78.9 | 90.6  |
| 11:44 | 79.2 | 90.6  |
| 11:45 | 79.4 | 90.6  |
| 11:46 | 79.7 | 90.7  |
| 11:47 | 79.9 | 90.7  |
| 11:48 | 80.2 | 90.7  |
| 11:49 | 80.4 | 90.7  |
| 11:50 | 80.7 | 90.7  |
| 11:51 | 80.9 | 90.7  |
| 11:52 | 81.2 | 90.7  |
| 11:53 | 81.4 | 90.7  |
| 11:54 | 81.7 | 90.7  |
| 11:55 | 81.9 | 90.8  |
| 11:56 | 82.2 | 90.8  |
| 11:57 | 82.4 | 90.8  |
| 11:58 | 82.7 | 90.8  |
| 11:59 | 82.9 | 90.8  |
| 12:00 | 83.2 | 90.9  |
| 12:01 | 83.4 | 90.9  |
| 12:02 | 83.7 | 90.9  |
| 12:03 | 83.9 | 91.0  |
| 12:04 | 84.2 | 91.0  |
| 12:05 | 84.4 | 91.0  |
| 12:06 | 84.7 | 91.1  |
| 12:07 | 84.9 | 91.1  |
| 12:08 | 85.2 | 91.2  |
| 12:09 | 85.4 | 91.2  |
| 12:10 | 85.7 | 91.3  |
| 12:11 | 85.9 | 91.4  |
| 12:12 | 86.2 | 91.4  |
| 12:13 | 86.4 | 91.5  |
| 12:14 | 86.7 | 91.6  |
| 12:15 | 86.9 | 91.8  |
| 12:16 | 87.2 | 91.9  |
| 12:17 | 87.4 | 92.1  |
| 12:18 | 87.7 | 92.3  |
| 12:19 | 87.9 | 92.6  |
| 12:20 | 88.2 | 93.0  |
| 12:21 | 88.4 | 93.4  |
| 12:22 | 88.7 | 94.1  |
| 12:23 | 88.9 | 95.0  |
| 12:24 | 89.2 | 96.6  |
| 12:25 | 89.4 | 99.4  |
| 12:26 | 89.7 | 106.3 |

|       |      |       |
|-------|------|-------|
| 12:27 | 89.9 | 141.4 |
| 12:28 | 89.8 | 241.1 |
| 12:29 | 89.6 | 257.2 |
| 12:30 | 89.3 | 261.8 |
| 12:31 | 89.1 | 264.0 |
| 12:32 | 88.8 | 265.3 |
| 12:33 | 88.6 | 266.1 |
| 12:34 | 88.3 | 266.6 |
| 12:35 | 88.1 | 267.1 |
| 12:36 | 87.8 | 267.4 |
| 12:37 | 87.6 | 267.6 |
| 12:38 | 87.3 | 267.8 |
| 12:39 | 87.1 | 268.0 |
| 12:40 | 86.8 | 268.2 |
| 12:41 | 86.6 | 268.3 |
| 12:42 | 86.3 | 268.4 |
| 12:43 | 86.1 | 268.5 |
| 12:44 | 85.8 | 268.5 |
| 12:45 | 85.6 | 268.6 |
| 12:46 | 85.3 | 268.7 |
| 12:47 | 85.1 | 268.7 |
| 12:48 | 84.8 | 268.8 |
| 12:49 | 84.6 | 268.8 |
| 12:50 | 84.3 | 268.9 |
| 12:51 | 84.1 | 268.9 |
| 12:52 | 83.8 | 268.9 |
| 12:53 | 83.6 | 269.0 |
| 12:54 | 83.3 | 269.0 |
| 12:55 | 83.1 | 269.0 |
| 12:56 | 82.8 | 269.0 |
| 12:57 | 82.6 | 269.1 |
| 12:58 | 82.3 | 269.1 |
| 12:59 | 82.1 | 269.1 |
| 13:00 | 81.8 | 269.1 |
| 13:01 | 81.6 | 269.1 |
| 13:02 | 81.3 | 269.1 |
| 13:03 | 81.1 | 269.2 |
| 13:04 | 80.8 | 269.2 |
| 13:05 | 80.6 | 269.2 |
| 13:06 | 80.3 | 269.2 |
| 13:07 | 80.1 | 269.2 |
| 13:08 | 79.8 | 269.2 |
| 13:09 | 79.6 | 269.2 |
| 13:10 | 79.3 | 269.2 |
| 13:11 | 79.1 | 269.2 |
| 13:12 | 78.8 | 269.2 |
| 13:13 | 78.6 | 269.2 |
| 13:14 | 78.3 | 269.3 |
| 13:15 | 78.1 | 269.3 |
| 13:16 | 77.8 | 269.3 |
| 13:17 | 77.6 | 269.3 |
| 13:18 | 77.3 | 269.3 |
| 13:19 | 77.1 | 269.3 |
| 13:20 | 76.8 | 269.3 |
| 13:21 | 76.6 | 269.3 |
| 13:22 | 76.3 | 269.3 |
| 13:23 | 76.1 | 269.3 |
| 13:24 | 75.8 | 269.3 |
| 13:25 | 75.6 | 269.3 |
| 13:26 | 75.3 | 269.3 |
| 13:27 | 75.1 | 269.3 |

|       |      |       |
|-------|------|-------|
| 13:28 | 74.8 | 269.3 |
| 13:29 | 74.6 | 269.3 |
| 13:30 | 74.3 | 269.3 |
| 13:31 | 74.1 | 269.3 |
| 13:32 | 73.8 | 269.3 |
| 13:33 | 73.6 | 269.3 |
| 13:34 | 73.3 | 269.3 |
| 13:35 | 73.1 | 269.3 |
| 13:36 | 72.8 | 269.3 |
| 13:37 | 72.6 | 269.3 |
| 13:38 | 72.3 | 269.3 |
| 13:39 | 72.1 | 269.3 |
| 13:40 | 71.8 | 269.3 |
| 13:41 | 71.6 | 269.3 |
| 13:42 | 71.3 | 269.3 |
| 13:43 | 71.1 | 269.3 |
| 13:44 | 70.8 | 269.3 |
| 13:45 | 70.6 | 269.3 |
| 13:46 | 70.3 | 269.3 |
| 13:47 | 70.1 | 269.3 |
| 13:48 | 69.8 | 269.3 |
| 13:49 | 69.6 | 269.3 |
| 13:50 | 69.3 | 269.3 |
| 13:51 | 69.1 | 269.3 |
| 13:52 | 68.8 | 269.3 |
| 13:53 | 68.6 | 269.3 |
| 13:54 | 68.3 | 269.3 |
| 13:55 | 68.1 | 269.3 |
| 13:56 | 67.8 | 269.3 |
| 13:57 | 67.6 | 269.3 |
| 13:58 | 67.3 | 269.3 |
| 13:59 | 67.1 | 269.3 |
| 14:00 | 66.8 | 269.3 |
| 14:01 | 66.6 | 269.3 |
| 14:02 | 66.3 | 269.3 |
| 14:03 | 66.1 | 269.3 |
| 14:04 | 65.8 | 269.3 |
| 14:05 | 65.6 | 269.3 |
| 14:06 | 65.3 | 269.3 |
| 14:07 | 65.1 | 269.3 |
| 14:08 | 64.8 | 269.3 |
| 14:09 | 64.6 | 269.3 |
| 14:10 | 64.3 | 269.2 |
| 14:11 | 64.1 | 269.2 |
| 14:12 | 63.8 | 269.2 |
| 14:13 | 63.6 | 269.2 |
| 14:14 | 63.3 | 269.2 |
| 14:15 | 63.1 | 269.2 |
| 14:16 | 62.8 | 269.2 |
| 14:17 | 62.6 | 269.2 |
| 14:18 | 62.3 | 269.2 |
| 14:19 | 62.1 | 269.2 |
| 14:20 | 61.8 | 269.2 |
| 14:21 | 61.6 | 269.2 |
| 14:22 | 61.3 | 269.2 |
| 14:23 | 61.1 | 269.2 |
| 14:24 | 60.8 | 269.2 |
| 14:25 | 60.6 | 269.2 |
| 14:26 | 60.3 | 269.2 |
| 14:27 | 60.1 | 269.2 |
| 14:28 | 59.8 | 269.2 |

|       |      |       |
|-------|------|-------|
| 14:29 | 59.6 | 269.2 |
| 14:30 | 59.3 | 269.2 |
| 14:31 | 59.1 | 269.2 |
| 14:32 | 58.8 | 269.2 |
| 14:33 | 58.6 | 269.2 |
| 14:34 | 58.4 | 269.2 |
| 14:35 | 58.1 | 269.2 |
| 14:36 | 57.9 | 269.2 |
| 14:37 | 57.6 | 269.2 |
| 14:38 | 57.4 | 269.2 |
| 14:39 | 57.1 | 269.2 |
| 14:40 | 56.9 | 269.1 |
| 14:41 | 56.6 | 269.1 |
| 14:42 | 56.4 | 269.1 |
| 14:43 | 56.1 | 269.1 |
| 14:44 | 55.9 | 269.1 |
| 14:45 | 55.6 | 269.1 |
| 14:46 | 55.4 | 269.1 |
| 14:47 | 55.1 | 269.1 |
| 14:48 | 54.9 | 269.1 |
| 14:49 | 54.6 | 269.1 |
| 14:50 | 54.4 | 269.1 |
| 14:51 | 54.1 | 269.1 |
| 14:52 | 53.9 | 269.1 |
| 14:53 | 53.6 | 269.1 |
| 14:54 | 53.4 | 269.1 |
| 14:55 | 53.1 | 269.1 |
| 14:56 | 52.9 | 269.1 |
| 14:57 | 52.6 | 269.1 |
| 14:58 | 52.4 | 269.1 |
| 14:59 | 52.1 | 269.1 |
| 15:00 | 51.9 | 269.1 |
| 15:01 | 51.6 | 269.1 |
| 15:02 | 51.4 | 269.1 |
| 15:03 | 51.1 | 269.1 |
| 15:04 | 50.9 | 269.1 |
| 15:05 | 50.6 | 269.0 |
| 15:06 | 50.4 | 269.0 |
| 15:07 | 50.1 | 269.0 |
| 15:08 | 49.9 | 269.0 |
| 15:09 | 49.6 | 269.0 |
| 15:10 | 49.4 | 269.0 |
| 15:11 | 49.1 | 269.0 |
| 15:12 | 48.9 | 269.0 |
| 15:13 | 48.6 | 269.0 |
| 15:14 | 48.4 | 269.0 |
| 15:15 | 48.1 | 269.0 |
| 15:16 | 47.9 | 269.0 |
| 15:17 | 47.6 | 269.0 |
| 15:18 | 47.4 | 269.0 |
| 15:19 | 47.1 | 269.0 |
| 15:20 | 46.9 | 269.0 |
| 15:21 | 46.6 | 269.0 |
| 15:22 | 46.4 | 269.0 |
| 15:23 | 46.1 | 269.0 |
| 15:24 | 45.9 | 269.0 |
| 15:25 | 45.6 | 269.0 |
| 15:26 | 45.4 | 269.0 |
| 15:27 | 45.1 | 268.9 |
| 15:28 | 44.9 | 268.9 |
| 15:29 | 44.6 | 268.9 |



|       |      |       |
|-------|------|-------|
| 15:30 | 44.4 | 268.9 |
| 15:31 | 44.1 | 268.9 |
| 15:32 | 43.9 | 268.9 |
| 15:33 | 43.6 | 268.9 |
| 15:34 | 43.4 | 268.9 |
| 15:35 | 43.1 | 268.9 |
| 15:36 | 42.9 | 268.9 |
| 15:37 | 42.6 | 268.9 |
| 15:38 | 42.4 | 268.9 |
| 15:39 | 42.1 | 268.9 |
| 15:40 | 41.9 | 268.9 |
| 15:41 | 41.6 | 268.9 |
| 15:42 | 41.4 | 268.9 |
| 15:43 | 41.1 | 268.9 |
| 15:44 | 40.9 | 268.9 |
| 15:45 | 40.6 | 268.9 |
| 15:46 | 40.4 | 268.9 |
| 15:47 | 40.1 | 268.9 |
| 15:48 | 39.9 | 268.8 |
| 15:49 | 39.6 | 268.8 |
| 15:50 | 39.4 | 268.8 |
| 15:51 | 39.1 | 268.8 |
| 15:52 | 38.9 | 268.8 |
| 15:53 | 38.6 | 268.8 |
| 15:54 | 38.4 | 268.8 |
| 15:55 | 38.1 | 268.8 |
| 15:56 | 37.9 | 268.8 |
| 15:57 | 37.6 | 268.8 |
| 15:58 | 37.4 | 268.8 |
| 15:59 | 37.1 | 268.8 |
| 16:00 | 36.9 | 268.8 |
| 16:01 | 36.6 | 268.8 |
| 16:02 | 36.4 | 268.8 |
| 16:03 | 36.1 | 268.8 |
| 16:04 | 35.9 | 268.8 |
| 16:05 | 35.6 | 268.8 |
| 16:06 | 35.4 | 268.8 |
| 16:07 | 35.1 | 268.7 |
| 16:08 | 34.9 | 268.7 |
| 16:09 | 34.6 | 268.7 |
| 16:10 | 34.4 | 268.7 |
| 16:11 | 34.1 | 268.7 |
| 16:12 | 33.9 | 268.7 |
| 16:13 | 33.6 | 268.7 |
| 16:14 | 33.4 | 268.7 |
| 16:15 | 33.1 | 268.7 |
| 16:16 | 32.9 | 268.7 |
| 16:17 | 32.6 | 268.7 |
| 16:18 | 32.4 | 268.7 |
| 16:19 | 32.1 | 268.7 |
| 16:20 | 31.9 | 268.7 |
| 16:21 | 31.6 | 268.7 |
| 16:22 | 31.4 | 268.7 |
| 16:23 | 31.1 | 268.7 |
| 16:24 | 30.9 | 268.7 |
| 16:25 | 30.6 | 268.6 |
| 16:26 | 30.4 | 268.6 |
| 16:27 | 30.1 | 268.6 |
| 16:28 | 29.9 | 268.6 |
| 16:29 | 29.6 | 268.6 |
| 16:30 | 29.4 | 268.6 |

|       |      |       |
|-------|------|-------|
| 16:31 | 29.1 | 268.6 |
| 16:32 | 28.9 | 268.6 |
| 16:33 | 28.6 | 268.6 |
| 16:34 | 28.4 | 268.6 |
| 16:35 | 28.1 | 268.6 |
| 16:36 | 27.9 | 268.6 |
| 16:37 | 27.6 | 268.6 |
| 16:38 | 27.4 | 268.6 |
| 16:39 | 27.1 | 268.6 |
| 16:40 | 26.9 | 268.6 |
| 16:41 | 26.6 | 268.5 |
| 16:42 | 26.4 | 268.5 |
| 16:43 | 26.1 | 268.5 |
| 16:44 | 25.9 | 268.5 |
| 16:45 | 25.6 | 268.5 |
| 16:46 | 25.4 | 268.5 |
| 16:47 | 25.1 | 268.5 |
| 16:48 | 24.9 | 268.5 |
| 16:49 | 24.6 | 268.5 |
| 16:50 | 24.4 | 268.5 |
| 16:51 | 24.1 | 268.5 |
| 16:52 | 23.9 | 268.5 |
| 16:53 | 23.6 | 268.5 |
| 16:54 | 23.4 | 268.5 |
| 16:55 | 23.2 | 268.5 |
| 16:56 | 22.9 | 268.5 |
| 16:57 | 22.7 | 268.4 |
| 16:58 | 22.4 | 268.4 |
| 16:59 | 22.2 | 268.4 |
| 17:00 | 21.9 | 268.4 |
| 17:01 | 21.7 | 268.4 |
| 17:02 | 21.4 | 268.4 |
| 17:03 | 21.2 | 268.4 |
| 17:04 | 20.9 | 268.4 |
| 17:05 | 20.7 | 268.4 |
| 17:06 | 20.4 | 268.4 |
| 17:07 | 20.2 | 268.4 |
| 17:08 | 19.9 | 268.4 |
| 17:09 | 19.7 | 268.4 |
| 17:10 | 19.4 | 268.4 |
| 17:11 | 19.2 | 268.4 |
| 17:12 | 18.9 | 268.4 |
| 17:13 | 18.7 | 268.3 |
| 17:14 | 18.4 | 268.3 |
| 17:15 | 18.2 | 268.3 |
| 17:16 | 17.9 | 268.3 |
| 17:17 | 17.7 | 268.3 |
| 17:18 | 17.4 | 268.3 |
| 17:19 | 17.2 | 268.3 |
| 17:20 | 16.9 | 268.3 |
| 17:21 | 16.7 | 268.3 |
| 17:22 | 16.4 | 268.3 |
| 17:23 | 16.2 | 268.3 |
| 17:24 | 15.9 | 268.3 |
| 17:25 | 15.7 | 268.3 |
| 17:26 | 15.4 | 268.3 |
| 17:27 | 15.2 | 268.2 |
| 17:28 | 14.9 | 268.2 |
| 17:29 | 14.7 | 268.2 |
| 17:30 | 14.4 | 268.2 |
| 17:31 | 14.2 | 268.2 |

|       |      |       |
|-------|------|-------|
| 17:32 | 13.9 | 268.2 |
| 17:33 | 13.7 | 268.2 |
| 17:34 | 13.4 | 268.2 |
| 17:35 | 13.2 | 268.2 |
| 17:36 | 12.9 | 268.2 |
| 17:37 | 12.7 | 268.2 |
| 17:38 | 12.4 | 268.2 |
| 17:39 | 12.2 | 268.2 |
| 17:40 | 11.9 | 268.2 |
| 17:41 | 11.7 | 268.1 |
| 17:42 | 11.5 | 268.1 |
| 17:43 | 11.2 | 268.1 |
| 17:44 | 11.0 | 268.1 |
| 17:45 | 10.7 | 268.1 |
| 17:46 | 10.5 | 268.1 |
| 17:47 | 10.2 | 268.1 |
| 17:48 | 10.0 | 268.1 |
| 17:49 | 9.7  | 268.1 |
| 17:50 | 9.5  | 268.1 |
| 17:51 | 9.2  | 268.1 |
| 17:52 | 9.0  | 268.1 |
| 17:53 | 8.7  | 268.1 |
| 17:54 | 8.5  | 268.0 |
| 17:55 | 8.2  | 268.0 |
| 17:56 | 8.0  | 268.0 |
| 17:57 | 7.7  | 268.0 |
| 17:58 | 7.5  | 268.0 |
| 17:59 | 7.2  | 268.0 |
| 18:00 | 7.0  | 268.0 |
| 18:01 | 6.8  | 268.0 |
| 18:02 | 6.5  | 268.0 |
| 18:03 | 6.3  | 268.0 |
| 18:04 | 6.0  | 268.0 |
| 18:05 | 5.8  | 268.0 |
| 18:06 | 5.5  | 267.9 |
| 18:07 | 5.3  | 267.9 |
| 18:08 | 5.0  | 267.9 |
| 18:09 | 4.8  | 267.9 |
| 18:10 | 4.6  | 267.9 |
| 18:11 | 4.3  | 267.9 |
| 18:12 | 4.1  | 267.9 |
| 18:13 | 3.8  | 267.9 |
| 18:14 | 3.6  | 267.9 |
| 18:15 | 3.4  | 267.9 |
| 18:16 | 3.1  | 267.9 |
| 18:17 | 2.9  | 267.9 |
| 18:18 | 2.6  | 267.8 |
| 18:19 | 2.4  | 267.8 |
| 18:20 | 2.2  | 267.8 |
| 18:21 | 1.9  | 267.8 |
| 18:22 | 1.7  | 267.8 |
| 18:23 | 1.5  | 267.8 |
| 18:24 | 1.3  | 267.8 |
| 18:25 | 1.0  | 267.8 |
| 18:26 | 0.8  | 267.8 |
| 18:27 | 0.6  | 267.8 |
| 18:28 | 0.4  | 267.8 |
| 18:29 | 0.2  | 267.7 |
| 18:30 | -0.0 | 267.7 |
| 18:31 | -0.9 | 267.7 |
| 18:32 | -1.1 | 267.7 |

|       |       |       |
|-------|-------|-------|
| 18:33 | -1.4  | 267.7 |
| 18:34 | -1.6  | 267.7 |
| 18:35 | -1.9  | 267.7 |
| 18:36 | -2.1  | 267.7 |
| 18:37 | -2.4  | 267.7 |
| 18:38 | -2.6  | 267.7 |
| 18:39 | -2.9  | 267.6 |
| 18:40 | -3.1  | 267.6 |
| 18:41 | -3.4  | 267.6 |
| 18:42 | -3.6  | 267.6 |
| 18:43 | -3.9  | 267.6 |
| 18:44 | -4.1  | 267.6 |
| 18:45 | -4.4  | 267.6 |
| 18:46 | -4.6  | 267.6 |
| 18:47 | -4.9  | 267.6 |
| 18:48 | -5.1  | 267.6 |
| 18:49 | -5.4  | 267.5 |
| 18:50 | -5.6  | 267.5 |
| 18:51 | -5.9  | 267.5 |
| 18:52 | -6.1  | 267.5 |
| 18:53 | -6.4  | 267.5 |
| 18:54 | -6.6  | 267.5 |
| 18:55 | -6.9  | 267.5 |
| 18:56 | -7.1  | 267.5 |
| 18:57 | -7.4  | 267.5 |
| 18:58 | -7.6  | 267.5 |
| 18:59 | -7.9  | 267.4 |
| 19:00 | -8.1  | 267.4 |
| 19:01 | -8.4  | 267.4 |
| 19:02 | -8.6  | 267.4 |
| 19:03 | -8.9  | 267.4 |
| 19:04 | -9.1  | 267.4 |
| 19:05 | -9.4  | 267.4 |
| 19:06 | -9.6  | 267.4 |
| 19:07 | -9.9  | 267.4 |
| 19:08 | -10.1 | 267.3 |
| 19:09 | -10.4 | 267.3 |
| 19:10 | -10.6 | 267.3 |
| 19:11 | -10.9 | 267.3 |
| 19:12 | -11.1 | 267.3 |
| 19:13 | -11.4 | 267.3 |
| 19:14 | -11.6 | 267.3 |
| 19:15 | -11.9 | 267.3 |

[Back to form](#)

Astronomical Applications Dept.  
U.S. Naval Observatory  
Washington, DC 20392-5420

MONTE ALEGRE

° , ° ,  
W 54 10, S 2 03

Altitude and Azimuth of the Sun  
Oct 31, 2009

Zone: 3h West of Greenwich

|       | Altitude | Azimuth  |
|-------|----------|----------|
|       |          | (E of N) |
| h m   | o        | o        |
| 05:30 | -11.7    | 104.9    |
| 05:40 | -9.3     | 104.7    |
| 05:50 | -6.8     | 104.6    |
| 06:00 | -4.4     | 104.4    |
| 06:10 | -2.0     | 104.3    |
| 06:20 | 0.9      | 104.2    |
| 06:30 | 3.1      | 104.1    |
| 06:40 | 5.4      | 104.1    |
| 06:50 | 7.8      | 104.1    |
| 07:00 | 10.2     | 104.1    |
| 07:10 | 12.6     | 104.1    |
| 07:20 | 15.0     | 104.2    |
| 07:30 | 17.4     | 104.3    |
| 07:40 | 19.9     | 104.4    |
| 07:50 | 22.3     | 104.5    |
| 08:00 | 24.7     | 104.7    |
| 08:10 | 27.1     | 104.9    |
| 08:20 | 29.5     | 105.2    |
| 08:30 | 31.9     | 105.5    |
| 08:40 | 34.3     | 105.9    |
| 08:50 | 36.7     | 106.3    |
| 09:00 | 39.1     | 106.7    |
| 09:10 | 41.5     | 107.3    |
| 09:20 | 43.9     | 107.9    |
| 09:30 | 46.2     | 108.6    |
| 09:40 | 48.6     | 109.4    |
| 09:50 | 51.0     | 110.3    |
| 10:00 | 53.3     | 111.3    |
| 10:10 | 55.6     | 112.6    |
| 10:20 | 57.9     | 114.0    |
| 10:30 | 60.2     | 115.7    |
| 10:40 | 62.4     | 117.6    |
| 10:50 | 64.6     | 119.9    |
| 11:00 | 66.7     | 122.7    |
| 11:10 | 68.8     | 126.1    |
| 11:20 | 70.7     | 130.2    |
| 11:30 | 72.6     | 135.2    |
| 11:40 | 74.2     | 141.4    |
| 11:50 | 75.7     | 148.9    |
| 12:00 | 76.8     | 158.0    |
| 12:10 | 77.5     | 168.4    |

|       |       |       |
|-------|-------|-------|
| 12:20 | 77.8  | 179.7 |
| 12:30 | 77.5  | 190.9 |
| 12:40 | 76.8  | 201.4 |
| 12:50 | 75.7  | 210.5 |
| 13:00 | 74.3  | 218.2 |
| 13:10 | 72.7  | 224.4 |
| 13:20 | 70.8  | 229.5 |
| 13:30 | 68.9  | 233.6 |
| 13:40 | 66.8  | 237.0 |
| 13:50 | 64.7  | 239.8 |
| 14:00 | 62.5  | 242.2 |
| 14:10 | 60.3  | 244.1 |
| 14:20 | 58.0  | 245.8 |
| 14:30 | 55.7  | 247.3 |
| 14:40 | 53.4  | 248.5 |
| 14:50 | 51.1  | 249.5 |
| 15:00 | 48.7  | 250.5 |
| 15:10 | 46.4  | 251.3 |
| 15:20 | 44.0  | 252.0 |
| 15:30 | 41.6  | 252.6 |
| 15:40 | 39.2  | 253.1 |
| 15:50 | 36.8  | 253.6 |
| 16:00 | 34.4  | 254.0 |
| 16:10 | 32.0  | 254.3 |
| 16:20 | 29.6  | 254.7 |
| 16:30 | 27.2  | 254.9 |
| 16:40 | 24.8  | 255.1 |
| 16:50 | 22.4  | 255.3 |
| 17:00 | 20.0  | 255.5 |
| 17:10 | 17.6  | 255.6 |
| 17:20 | 15.2  | 255.7 |
| 17:30 | 12.8  | 255.7 |
| 17:40 | 10.4  | 255.8 |
| 17:50 | 8.0   | 255.8 |
| 18:00 | 5.6   | 255.8 |
| 18:10 | 3.2   | 255.7 |
| 18:20 | 1.0   | 255.6 |
| 18:30 | -1.8  | 255.5 |
| 18:40 | -4.3  | 255.4 |
| 18:50 | -6.7  | 255.3 |
| 19:00 | -9.1  | 255.1 |
| 19:10 | -11.5 | 254.9 |

[Back to form](#)

Astronomical Applications Dept.  
U.S. Naval Observatory  
Washington, DC 20392-5420

MONTE ALEGRE

° , ° ,  
W 54 10, S 2 03

Altitude and Azimuth of the Sun  
Nov 17, 2009

Zone: 3h West of Greenwich

|       | Altitude | Azimuth  |
|-------|----------|----------|
|       |          | (E of N) |
| h m   | o        | o        |
| 05:30 | -11.5    | 109.9    |
| 05:40 | -9.2     | 109.7    |
| 05:50 | -6.8     | 109.5    |
| 06:00 | -4.4     | 109.3    |
| 06:10 | -2.1     | 109.2    |
| 06:20 | 0.7      | 109.1    |
| 06:30 | 2.9      | 109.0    |
| 06:40 | 5.2      | 109.0    |
| 06:50 | 7.5      | 109.0    |
| 07:00 | 9.8      | 109.0    |
| 07:10 | 12.2     | 109.1    |
| 07:20 | 14.5     | 109.2    |
| 07:30 | 16.9     | 109.3    |
| 07:40 | 19.2     | 109.5    |
| 07:50 | 21.6     | 109.7    |
| 08:00 | 23.9     | 110.0    |
| 08:10 | 26.2     | 110.3    |
| 08:20 | 28.6     | 110.7    |
| 08:30 | 30.9     | 111.1    |
| 08:40 | 33.2     | 111.6    |
| 08:50 | 35.6     | 112.1    |
| 09:00 | 37.9     | 112.7    |
| 09:10 | 40.2     | 113.4    |
| 09:20 | 42.4     | 114.2    |
| 09:30 | 44.7     | 115.1    |
| 09:40 | 47.0     | 116.2    |
| 09:50 | 49.2     | 117.3    |
| 10:00 | 51.4     | 118.7    |
| 10:10 | 53.6     | 120.2    |
| 10:20 | 55.7     | 121.9    |
| 10:30 | 57.8     | 123.9    |
| 10:40 | 59.8     | 126.2    |
| 10:50 | 61.8     | 128.8    |
| 11:00 | 63.7     | 131.9    |
| 11:10 | 65.5     | 135.4    |
| 11:20 | 67.2     | 139.5    |
| 11:30 | 68.8     | 144.3    |
| 11:40 | 70.1     | 149.8    |
| 11:50 | 71.3     | 156.1    |
| 12:00 | 72.1     | 163.1    |
| 12:10 | 72.7     | 170.7    |

|       |       |       |
|-------|-------|-------|
| 12:20 | 72.9  | 178.6 |
| 12:30 | 72.8  | 186.6 |
| 12:40 | 72.4  | 194.4 |
| 12:50 | 71.6  | 201.6 |
| 13:00 | 70.5  | 208.1 |
| 13:10 | 69.2  | 213.9 |
| 13:20 | 67.8  | 218.9 |
| 13:30 | 66.1  | 223.2 |
| 13:40 | 64.3  | 226.9 |
| 13:50 | 62.5  | 230.2 |
| 14:00 | 60.5  | 232.9 |
| 14:10 | 58.5  | 235.3 |
| 14:20 | 56.4  | 237.4 |
| 14:30 | 54.3  | 239.2 |
| 14:40 | 52.1  | 240.8 |
| 14:50 | 49.9  | 242.2 |
| 15:00 | 47.7  | 243.4 |
| 15:10 | 45.5  | 244.4 |
| 15:20 | 43.2  | 245.4 |
| 15:30 | 40.9  | 246.2 |
| 15:40 | 38.6  | 247.0 |
| 15:50 | 36.3  | 247.6 |
| 16:00 | 34.0  | 248.2 |
| 16:10 | 31.7  | 248.7 |
| 16:20 | 29.4  | 249.1 |
| 16:30 | 27.0  | 249.5 |
| 16:40 | 24.7  | 249.8 |
| 16:50 | 22.3  | 250.1 |
| 17:00 | 20.0  | 250.3 |
| 17:10 | 17.7  | 250.5 |
| 17:20 | 15.3  | 250.7 |
| 17:30 | 13.0  | 250.8 |
| 17:40 | 10.6  | 250.9 |
| 17:50 | 8.3   | 250.9 |
| 18:00 | 6.0   | 250.9 |
| 18:10 | 3.7   | 250.9 |
| 18:20 | 1.4   | 250.8 |
| 18:30 | -1.3  | 250.8 |
| 18:40 | -3.6  | 250.6 |
| 18:50 | -6.0  | 250.5 |
| 19:00 | -8.3  | 250.3 |
| 19:10 | -10.7 | 250.0 |

[Back to form](#)



Astronomical Applications Dept.  
U.S. Naval Observatory  
Washington, DC 20392-5420

° , ° ,  
W 54 10, S 2 03

Altitude and Azimuth of the Sun  
Dec 21, 2010

Zone: 3h West of Greenwich

|       | Altitude | Azimuth  |
|-------|----------|----------|
|       |          | (E of N) |
| h m   | o        | o        |
| 05:39 | -11.9    | 114.5    |
| 05:40 | -11.7    | 114.4    |
| 05:41 | -11.4    | 114.4    |
| 05:42 | -11.2    | 114.4    |
| 05:43 | -11.0    | 114.4    |
| 05:44 | -10.8    | 114.3    |
| 05:45 | -10.5    | 114.3    |
| 05:46 | -10.3    | 114.3    |
| 05:47 | -10.1    | 114.2    |
| 05:48 | -9.9     | 114.2    |
| 05:49 | -9.6     | 114.2    |
| 05:50 | -9.4     | 114.2    |
| 05:51 | -9.2     | 114.1    |
| 05:52 | -8.9     | 114.1    |
| 05:53 | -8.7     | 114.1    |
| 05:54 | -8.5     | 114.1    |
| 05:55 | -8.3     | 114.0    |
| 05:56 | -8.0     | 114.0    |
| 05:57 | -7.8     | 114.0    |
| 05:58 | -7.6     | 114.0    |
| 05:59 | -7.3     | 113.9    |
| 06:00 | -7.1     | 113.9    |
| 06:01 | -6.9     | 113.9    |
| 06:02 | -6.7     | 113.9    |
| 06:03 | -6.4     | 113.9    |
| 06:04 | -6.2     | 113.8    |
| 06:05 | -6.0     | 113.8    |
| 06:06 | -5.7     | 113.8    |
| 06:07 | -5.5     | 113.8    |
| 06:08 | -5.3     | 113.8    |
| 06:09 | -5.1     | 113.7    |
| 06:10 | -4.8     | 113.7    |
| 06:11 | -4.6     | 113.7    |
| 06:12 | -4.4     | 113.7    |
| 06:13 | -4.1     | 113.7    |
| 06:14 | -3.9     | 113.7    |
| 06:15 | -3.7     | 113.6    |
| 06:16 | -3.5     | 113.6    |
| 06:17 | -3.2     | 113.6    |
| 06:18 | -3.0     | 113.6    |
| 06:19 | -2.8     | 113.6    |

|       |      |       |
|-------|------|-------|
| 06:20 | -2.5 | 113.6 |
| 06:21 | -2.3 | 113.6 |
| 06:22 | -2.1 | 113.6 |
| 06:23 | -1.9 | 113.5 |
| 06:24 | -1.6 | 113.5 |
| 06:25 | -1.4 | 113.5 |
| 06:26 | -1.2 | 113.5 |
| 06:27 | -0.9 | 113.5 |
| 06:28 | -0.1 | 113.5 |
| 06:29 | 0.1  | 113.5 |
| 06:30 | 0.3  | 113.5 |
| 06:31 | 0.5  | 113.5 |
| 06:32 | 0.7  | 113.4 |
| 06:33 | 0.9  | 113.4 |
| 06:34 | 1.1  | 113.4 |
| 06:35 | 1.3  | 113.4 |
| 06:36 | 1.5  | 113.4 |
| 06:37 | 1.7  | 113.4 |
| 06:38 | 1.9  | 113.4 |
| 06:39 | 2.1  | 113.4 |
| 06:40 | 2.3  | 113.4 |
| 06:41 | 2.5  | 113.4 |
| 06:42 | 2.7  | 113.4 |
| 06:43 | 3.0  | 113.4 |
| 06:44 | 3.2  | 113.4 |
| 06:45 | 3.4  | 113.4 |
| 06:46 | 3.6  | 113.4 |
| 06:47 | 3.8  | 113.4 |
| 06:48 | 4.1  | 113.4 |
| 06:49 | 4.3  | 113.4 |
| 06:50 | 4.5  | 113.4 |
| 06:51 | 4.7  | 113.4 |
| 06:52 | 5.0  | 113.4 |
| 06:53 | 5.2  | 113.4 |
| 06:54 | 5.4  | 113.4 |
| 06:55 | 5.6  | 113.4 |
| 06:56 | 5.9  | 113.4 |
| 06:57 | 6.1  | 113.4 |
| 06:58 | 6.3  | 113.4 |
| 06:59 | 6.5  | 113.4 |
| 07:00 | 6.8  | 113.4 |
| 07:01 | 7.0  | 113.4 |
| 07:02 | 7.2  | 113.4 |
| 07:03 | 7.4  | 113.4 |
| 07:04 | 7.7  | 113.4 |
| 07:05 | 7.9  | 113.4 |
| 07:06 | 8.1  | 113.4 |
| 07:07 | 8.3  | 113.4 |
| 07:08 | 8.6  | 113.4 |
| 07:09 | 8.8  | 113.4 |
| 07:10 | 9.0  | 113.4 |
| 07:11 | 9.2  | 113.4 |
| 07:12 | 9.5  | 113.4 |
| 07:13 | 9.7  | 113.4 |
| 07:14 | 9.9  | 113.4 |
| 07:15 | 10.1 | 113.4 |
| 07:16 | 10.4 | 113.5 |
| 07:17 | 10.6 | 113.5 |
| 07:18 | 10.8 | 113.5 |
| 07:19 | 11.1 | 113.5 |
| 07:20 | 11.3 | 113.5 |

|       |      |       |
|-------|------|-------|
| 07:21 | 11.5 | 113.5 |
| 07:22 | 11.7 | 113.5 |
| 07:23 | 12.0 | 113.5 |
| 07:24 | 12.2 | 113.5 |
| 07:25 | 12.4 | 113.6 |
| 07:26 | 12.7 | 113.6 |
| 07:27 | 12.9 | 113.6 |
| 07:28 | 13.1 | 113.6 |
| 07:29 | 13.3 | 113.6 |
| 07:30 | 13.6 | 113.6 |
| 07:31 | 13.8 | 113.6 |
| 07:32 | 14.0 | 113.7 |
| 07:33 | 14.2 | 113.7 |
| 07:34 | 14.5 | 113.7 |
| 07:35 | 14.7 | 113.7 |
| 07:36 | 14.9 | 113.7 |
| 07:37 | 15.2 | 113.7 |
| 07:38 | 15.4 | 113.8 |
| 07:39 | 15.6 | 113.8 |
| 07:40 | 15.8 | 113.8 |
| 07:41 | 16.1 | 113.8 |
| 07:42 | 16.3 | 113.8 |
| 07:43 | 16.5 | 113.9 |
| 07:44 | 16.8 | 113.9 |
| 07:45 | 17.0 | 113.9 |
| 07:46 | 17.2 | 113.9 |
| 07:47 | 17.4 | 113.9 |
| 07:48 | 17.7 | 114.0 |
| 07:49 | 17.9 | 114.0 |
| 07:50 | 18.1 | 114.0 |
| 07:51 | 18.3 | 114.0 |
| 07:52 | 18.6 | 114.1 |
| 07:53 | 18.8 | 114.1 |
| 07:54 | 19.0 | 114.1 |
| 07:55 | 19.3 | 114.1 |
| 07:56 | 19.5 | 114.2 |
| 07:57 | 19.7 | 114.2 |
| 07:58 | 19.9 | 114.2 |
| 07:59 | 20.2 | 114.3 |
| 08:00 | 20.4 | 114.3 |
| 08:01 | 20.6 | 114.3 |
| 08:02 | 20.8 | 114.3 |
| 08:03 | 21.1 | 114.4 |
| 08:04 | 21.3 | 114.4 |
| 08:05 | 21.5 | 114.4 |
| 08:06 | 21.8 | 114.5 |
| 08:07 | 22.0 | 114.5 |
| 08:08 | 22.2 | 114.5 |
| 08:09 | 22.4 | 114.6 |
| 08:10 | 22.7 | 114.6 |
| 08:11 | 22.9 | 114.6 |
| 08:12 | 23.1 | 114.7 |
| 08:13 | 23.3 | 114.7 |
| 08:14 | 23.6 | 114.7 |
| 08:15 | 23.8 | 114.8 |
| 08:16 | 24.0 | 114.8 |
| 08:17 | 24.2 | 114.9 |
| 08:18 | 24.5 | 114.9 |
| 08:19 | 24.7 | 114.9 |
| 08:20 | 24.9 | 115.0 |
| 08:21 | 25.1 | 115.0 |

|       |      |       |
|-------|------|-------|
| 08:22 | 25.4 | 115.1 |
| 08:23 | 25.6 | 115.1 |
| 08:24 | 25.8 | 115.1 |
| 08:25 | 26.1 | 115.2 |
| 08:26 | 26.3 | 115.2 |
| 08:27 | 26.5 | 115.3 |
| 08:28 | 26.7 | 115.3 |
| 08:29 | 27.0 | 115.4 |
| 08:30 | 27.2 | 115.4 |
| 08:31 | 27.4 | 115.4 |
| 08:32 | 27.6 | 115.5 |
| 08:33 | 27.9 | 115.5 |
| 08:34 | 28.1 | 115.6 |
| 08:35 | 28.3 | 115.6 |
| 08:36 | 28.5 | 115.7 |
| 08:37 | 28.8 | 115.7 |
| 08:38 | 29.0 | 115.8 |
| 08:39 | 29.2 | 115.8 |
| 08:40 | 29.4 | 115.9 |
| 08:41 | 29.7 | 115.9 |
| 08:42 | 29.9 | 116.0 |
| 08:43 | 30.1 | 116.1 |
| 08:44 | 30.3 | 116.1 |
| 08:45 | 30.5 | 116.2 |
| 08:46 | 30.8 | 116.2 |
| 08:47 | 31.0 | 116.3 |
| 08:48 | 31.2 | 116.3 |
| 08:49 | 31.4 | 116.4 |
| 08:50 | 31.7 | 116.5 |
| 08:51 | 31.9 | 116.5 |
| 08:52 | 32.1 | 116.6 |
| 08:53 | 32.3 | 116.6 |
| 08:54 | 32.6 | 116.7 |
| 08:55 | 32.8 | 116.8 |
| 08:56 | 33.0 | 116.8 |
| 08:57 | 33.2 | 116.9 |
| 08:58 | 33.5 | 117.0 |
| 08:59 | 33.7 | 117.0 |
| 09:00 | 33.9 | 117.1 |
| 09:01 | 34.1 | 117.2 |
| 09:02 | 34.3 | 117.2 |
| 09:03 | 34.6 | 117.3 |
| 09:04 | 34.8 | 117.4 |
| 09:05 | 35.0 | 117.4 |
| 09:06 | 35.2 | 117.5 |
| 09:07 | 35.4 | 117.6 |
| 09:08 | 35.7 | 117.7 |
| 09:09 | 35.9 | 117.7 |
| 09:10 | 36.1 | 117.8 |
| 09:11 | 36.3 | 117.9 |
| 09:12 | 36.6 | 118.0 |
| 09:13 | 36.8 | 118.0 |
| 09:14 | 37.0 | 118.1 |
| 09:15 | 37.2 | 118.2 |
| 09:16 | 37.4 | 118.3 |
| 09:17 | 37.7 | 118.4 |
| 09:18 | 37.9 | 118.4 |
| 09:19 | 38.1 | 118.5 |
| 09:20 | 38.3 | 118.6 |
| 09:21 | 38.5 | 118.7 |
| 09:22 | 38.7 | 118.8 |

|       |      |       |
|-------|------|-------|
| 09:23 | 39.0 | 118.9 |
| 09:24 | 39.2 | 119.0 |
| 09:25 | 39.4 | 119.0 |
| 09:26 | 39.6 | 119.1 |
| 09:27 | 39.8 | 119.2 |
| 09:28 | 40.1 | 119.3 |
| 09:29 | 40.3 | 119.4 |
| 09:30 | 40.5 | 119.5 |
| 09:31 | 40.7 | 119.6 |
| 09:32 | 40.9 | 119.7 |
| 09:33 | 41.1 | 119.8 |
| 09:34 | 41.4 | 119.9 |
| 09:35 | 41.6 | 120.0 |
| 09:36 | 41.8 | 120.1 |
| 09:37 | 42.0 | 120.2 |
| 09:38 | 42.2 | 120.3 |
| 09:39 | 42.4 | 120.4 |
| 09:40 | 42.7 | 120.5 |
| 09:41 | 42.9 | 120.6 |
| 09:42 | 43.1 | 120.8 |
| 09:43 | 43.3 | 120.9 |
| 09:44 | 43.5 | 121.0 |
| 09:45 | 43.7 | 121.1 |
| 09:46 | 43.9 | 121.2 |
| 09:47 | 44.2 | 121.3 |
| 09:48 | 44.4 | 121.4 |
| 09:49 | 44.6 | 121.6 |
| 09:50 | 44.8 | 121.7 |
| 09:51 | 45.0 | 121.8 |
| 09:52 | 45.2 | 121.9 |
| 09:53 | 45.4 | 122.0 |
| 09:54 | 45.6 | 122.2 |
| 09:55 | 45.8 | 122.3 |
| 09:56 | 46.1 | 122.4 |
| 09:57 | 46.3 | 122.6 |
| 09:58 | 46.5 | 122.7 |
| 09:59 | 46.7 | 122.8 |
| 10:00 | 46.9 | 123.0 |
| 10:01 | 47.1 | 123.1 |
| 10:02 | 47.3 | 123.2 |
| 10:03 | 47.5 | 123.4 |
| 10:04 | 47.7 | 123.5 |
| 10:05 | 47.9 | 123.7 |
| 10:06 | 48.1 | 123.8 |
| 10:07 | 48.4 | 124.0 |
| 10:08 | 48.6 | 124.1 |
| 10:09 | 48.8 | 124.3 |
| 10:10 | 49.0 | 124.4 |
| 10:11 | 49.2 | 124.6 |
| 10:12 | 49.4 | 124.7 |
| 10:13 | 49.6 | 124.9 |
| 10:14 | 49.8 | 125.0 |
| 10:15 | 50.0 | 125.2 |
| 10:16 | 50.2 | 125.4 |
| 10:17 | 50.4 | 125.5 |
| 10:18 | 50.6 | 125.7 |
| 10:19 | 50.8 | 125.9 |
| 10:20 | 51.0 | 126.0 |
| 10:21 | 51.2 | 126.2 |
| 10:22 | 51.4 | 126.4 |
| 10:23 | 51.6 | 126.6 |

|       |      |       |
|-------|------|-------|
| 10:24 | 51.8 | 126.7 |
| 10:25 | 52.0 | 126.9 |
| 10:26 | 52.2 | 127.1 |
| 10:27 | 52.4 | 127.3 |
| 10:28 | 52.6 | 127.5 |
| 10:29 | 52.8 | 127.7 |
| 10:30 | 53.0 | 127.9 |
| 10:31 | 53.2 | 128.1 |
| 10:32 | 53.4 | 128.3 |
| 10:33 | 53.6 | 128.5 |
| 10:34 | 53.8 | 128.7 |
| 10:35 | 54.0 | 128.9 |
| 10:36 | 54.2 | 129.1 |
| 10:37 | 54.4 | 129.3 |
| 10:38 | 54.6 | 129.5 |
| 10:39 | 54.8 | 129.7 |
| 10:40 | 55.0 | 129.9 |
| 10:41 | 55.1 | 130.2 |
| 10:42 | 55.3 | 130.4 |
| 10:43 | 55.5 | 130.6 |
| 10:44 | 55.7 | 130.8 |
| 10:45 | 55.9 | 131.1 |
| 10:46 | 56.1 | 131.3 |
| 10:47 | 56.3 | 131.5 |
| 10:48 | 56.5 | 131.8 |
| 10:49 | 56.7 | 132.0 |
| 10:50 | 56.8 | 132.3 |
| 10:51 | 57.0 | 132.5 |
| 10:52 | 57.2 | 132.8 |
| 10:53 | 57.4 | 133.0 |
| 10:54 | 57.6 | 133.3 |
| 10:55 | 57.8 | 133.5 |
| 10:56 | 57.9 | 133.8 |
| 10:57 | 58.1 | 134.1 |
| 10:58 | 58.3 | 134.4 |
| 10:59 | 58.5 | 134.6 |
| 11:00 | 58.6 | 134.9 |
| 11:01 | 58.8 | 135.2 |
| 11:02 | 59.0 | 135.5 |
| 11:03 | 59.2 | 135.8 |
| 11:04 | 59.3 | 136.1 |
| 11:05 | 59.5 | 136.4 |
| 11:06 | 59.7 | 136.7 |
| 11:07 | 59.9 | 137.0 |
| 11:08 | 60.0 | 137.3 |
| 11:09 | 60.2 | 137.6 |
| 11:10 | 60.4 | 137.9 |
| 11:11 | 60.5 | 138.2 |
| 11:12 | 60.7 | 138.5 |
| 11:13 | 60.9 | 138.9 |
| 11:14 | 61.0 | 139.2 |
| 11:15 | 61.2 | 139.5 |
| 11:16 | 61.4 | 139.9 |
| 11:17 | 61.5 | 140.2 |
| 11:18 | 61.7 | 140.5 |
| 11:19 | 61.8 | 140.9 |
| 11:20 | 62.0 | 141.3 |
| 11:21 | 62.1 | 141.6 |
| 11:22 | 62.3 | 142.0 |
| 11:23 | 62.5 | 142.3 |
| 11:24 | 62.6 | 142.7 |

|       |      |       |
|-------|------|-------|
| 11:25 | 62.8 | 143.1 |
| 11:26 | 62.9 | 143.5 |
| 11:27 | 63.1 | 143.9 |
| 11:28 | 63.2 | 144.3 |
| 11:29 | 63.3 | 144.6 |
| 11:30 | 63.5 | 145.0 |
| 11:31 | 63.6 | 145.4 |
| 11:32 | 63.8 | 145.9 |
| 11:33 | 63.9 | 146.3 |
| 11:34 | 64.0 | 146.7 |
| 11:35 | 64.2 | 147.1 |
| 11:36 | 64.3 | 147.5 |
| 11:37 | 64.5 | 148.0 |
| 11:38 | 64.6 | 148.4 |
| 11:39 | 64.7 | 148.8 |
| 11:40 | 64.8 | 149.3 |
| 11:41 | 65.0 | 149.7 |
| 11:42 | 65.1 | 150.2 |
| 11:43 | 65.2 | 150.7 |
| 11:44 | 65.3 | 151.1 |
| 11:45 | 65.5 | 151.6 |
| 11:46 | 65.6 | 152.1 |
| 11:47 | 65.7 | 152.5 |
| 11:48 | 65.8 | 153.0 |
| 11:49 | 65.9 | 153.5 |
| 11:50 | 66.0 | 154.0 |
| 11:51 | 66.1 | 154.5 |
| 11:52 | 66.2 | 155.0 |
| 11:53 | 66.3 | 155.5 |
| 11:54 | 66.4 | 156.0 |
| 11:55 | 66.6 | 156.5 |
| 11:56 | 66.6 | 157.1 |
| 11:57 | 66.7 | 157.6 |
| 11:58 | 66.8 | 158.1 |
| 11:59 | 66.9 | 158.7 |
| 12:00 | 67.0 | 159.2 |
| 12:01 | 67.1 | 159.7 |
| 12:02 | 67.2 | 160.3 |
| 12:03 | 67.3 | 160.8 |
| 12:04 | 67.4 | 161.4 |
| 12:05 | 67.4 | 162.0 |
| 12:06 | 67.5 | 162.5 |
| 12:07 | 67.6 | 163.1 |
| 12:08 | 67.7 | 163.7 |
| 12:09 | 67.7 | 164.2 |
| 12:10 | 67.8 | 164.8 |
| 12:11 | 67.9 | 165.4 |
| 12:12 | 67.9 | 166.0 |
| 12:13 | 68.0 | 166.6 |
| 12:14 | 68.0 | 167.2 |
| 12:15 | 68.1 | 167.8 |
| 12:16 | 68.1 | 168.4 |
| 12:17 | 68.2 | 169.0 |
| 12:18 | 68.2 | 169.6 |
| 12:19 | 68.3 | 170.2 |
| 12:20 | 68.3 | 170.8 |
| 12:21 | 68.4 | 171.4 |
| 12:22 | 68.4 | 172.0 |
| 12:23 | 68.4 | 172.6 |
| 12:24 | 68.5 | 173.3 |
| 12:25 | 68.5 | 173.9 |

|       |      |       |
|-------|------|-------|
| 12:26 | 68.5 | 174.5 |
| 12:27 | 68.5 | 175.1 |
| 12:28 | 68.6 | 175.7 |
| 12:29 | 68.6 | 176.4 |
| 12:30 | 68.6 | 177.0 |
| 12:31 | 68.6 | 177.6 |
| 12:32 | 68.6 | 178.2 |
| 12:33 | 68.6 | 178.9 |
| 12:34 | 68.6 | 179.5 |
| 12:35 | 68.6 | 180.1 |
| 12:36 | 68.6 | 180.8 |
| 12:37 | 68.6 | 181.4 |
| 12:38 | 68.6 | 182.0 |
| 12:39 | 68.6 | 182.6 |
| 12:40 | 68.6 | 183.3 |
| 12:41 | 68.6 | 183.9 |
| 12:42 | 68.5 | 184.5 |
| 12:43 | 68.5 | 185.1 |
| 12:44 | 68.5 | 185.8 |
| 12:45 | 68.5 | 186.4 |
| 12:46 | 68.4 | 187.0 |
| 12:47 | 68.4 | 187.6 |
| 12:48 | 68.4 | 188.2 |
| 12:49 | 68.3 | 188.9 |
| 12:50 | 68.3 | 189.5 |
| 12:51 | 68.3 | 190.1 |
| 12:52 | 68.2 | 190.7 |
| 12:53 | 68.2 | 191.3 |
| 12:54 | 68.1 | 191.9 |
| 12:55 | 68.1 | 192.5 |
| 12:56 | 68.0 | 193.1 |
| 12:57 | 68.0 | 193.7 |
| 12:58 | 67.9 | 194.3 |
| 12:59 | 67.8 | 194.8 |
| 13:00 | 67.8 | 195.4 |
| 13:01 | 67.7 | 196.0 |
| 13:02 | 67.6 | 196.6 |
| 13:03 | 67.6 | 197.2 |
| 13:04 | 67.5 | 197.7 |
| 13:05 | 67.4 | 198.3 |
| 13:06 | 67.3 | 198.8 |
| 13:07 | 67.2 | 199.4 |
| 13:08 | 67.2 | 199.9 |
| 13:09 | 67.1 | 200.5 |
| 13:10 | 67.0 | 201.0 |
| 13:11 | 66.9 | 201.6 |
| 13:12 | 66.8 | 202.1 |
| 13:13 | 66.7 | 202.6 |
| 13:14 | 66.6 | 203.2 |
| 13:15 | 66.5 | 203.7 |
| 13:16 | 66.4 | 204.2 |
| 13:17 | 66.3 | 204.7 |
| 13:18 | 66.2 | 205.2 |
| 13:19 | 66.1 | 205.7 |
| 13:20 | 66.0 | 206.2 |
| 13:21 | 65.9 | 206.7 |
| 13:22 | 65.8 | 207.2 |
| 13:23 | 65.6 | 207.7 |
| 13:24 | 65.5 | 208.1 |
| 13:25 | 65.4 | 208.6 |
| 13:26 | 65.3 | 209.1 |



|       |      |       |
|-------|------|-------|
| 13:27 | 65.2 | 209.5 |
| 13:28 | 65.0 | 210.0 |
| 13:29 | 64.9 | 210.5 |
| 13:30 | 64.8 | 210.9 |
| 13:31 | 64.7 | 211.3 |
| 13:32 | 64.5 | 211.8 |
| 13:33 | 64.4 | 212.2 |
| 13:34 | 64.3 | 212.6 |
| 13:35 | 64.1 | 213.1 |
| 13:36 | 64.0 | 213.5 |
| 13:37 | 63.8 | 213.9 |
| 13:38 | 63.7 | 214.3 |
| 13:39 | 63.6 | 214.7 |
| 13:40 | 63.4 | 215.1 |
| 13:41 | 63.3 | 215.5 |
| 13:42 | 63.1 | 215.9 |
| 13:43 | 63.0 | 216.3 |
| 13:44 | 62.8 | 216.7 |
| 13:45 | 62.7 | 217.1 |
| 13:46 | 62.5 | 217.4 |
| 13:47 | 62.4 | 217.8 |
| 13:48 | 62.2 | 218.2 |
| 13:49 | 62.1 | 218.5 |
| 13:50 | 61.9 | 218.9 |
| 13:51 | 61.8 | 219.2 |
| 13:52 | 61.6 | 219.6 |
| 13:53 | 61.4 | 219.9 |
| 13:54 | 61.3 | 220.3 |
| 13:55 | 61.1 | 220.6 |
| 13:56 | 61.0 | 221.0 |
| 13:57 | 60.8 | 221.3 |
| 13:58 | 60.6 | 221.6 |
| 13:59 | 60.5 | 221.9 |
| 14:00 | 60.3 | 222.2 |
| 14:01 | 60.1 | 222.6 |
| 14:02 | 60.0 | 222.9 |
| 14:03 | 59.8 | 223.2 |
| 14:04 | 59.6 | 223.5 |
| 14:05 | 59.4 | 223.8 |
| 14:06 | 59.3 | 224.1 |
| 14:07 | 59.1 | 224.4 |
| 14:08 | 58.9 | 224.6 |
| 14:09 | 58.7 | 224.9 |
| 14:10 | 58.6 | 225.2 |
| 14:11 | 58.4 | 225.5 |
| 14:12 | 58.2 | 225.8 |
| 14:13 | 58.0 | 226.0 |
| 14:14 | 57.9 | 226.3 |
| 14:15 | 57.7 | 226.6 |
| 14:16 | 57.5 | 226.8 |
| 14:17 | 57.3 | 227.1 |
| 14:18 | 57.1 | 227.3 |
| 14:19 | 56.9 | 227.6 |
| 14:20 | 56.8 | 227.8 |
| 14:21 | 56.6 | 228.1 |
| 14:22 | 56.4 | 228.3 |
| 14:23 | 56.2 | 228.6 |
| 14:24 | 56.0 | 228.8 |
| 14:25 | 55.8 | 229.0 |
| 14:26 | 55.6 | 229.3 |
| 14:27 | 55.4 | 229.5 |

|       |      |       |
|-------|------|-------|
| 14:28 | 55.3 | 229.7 |
| 14:29 | 55.1 | 229.9 |
| 14:30 | 54.9 | 230.2 |
| 14:31 | 54.7 | 230.4 |
| 14:32 | 54.5 | 230.6 |
| 14:33 | 54.3 | 230.8 |
| 14:34 | 54.1 | 231.0 |
| 14:35 | 53.9 | 231.2 |
| 14:36 | 53.7 | 231.4 |
| 14:37 | 53.5 | 231.6 |
| 14:38 | 53.3 | 231.8 |
| 14:39 | 53.1 | 232.0 |
| 14:40 | 52.9 | 232.2 |
| 14:41 | 52.7 | 232.4 |
| 14:42 | 52.5 | 232.6 |
| 14:43 | 52.3 | 232.8 |
| 14:44 | 52.1 | 233.0 |
| 14:45 | 51.9 | 233.2 |
| 14:46 | 51.7 | 233.3 |
| 14:47 | 51.5 | 233.5 |
| 14:48 | 51.3 | 233.7 |
| 14:49 | 51.1 | 233.9 |
| 14:50 | 50.9 | 234.0 |
| 14:51 | 50.7 | 234.2 |
| 14:52 | 50.5 | 234.4 |
| 14:53 | 50.3 | 234.5 |
| 14:54 | 50.1 | 234.7 |
| 14:55 | 49.9 | 234.9 |
| 14:56 | 49.7 | 235.0 |
| 14:57 | 49.5 | 235.2 |
| 14:58 | 49.3 | 235.3 |
| 14:59 | 49.1 | 235.5 |
| 15:00 | 48.9 | 235.7 |
| 15:01 | 48.7 | 235.8 |
| 15:02 | 48.5 | 236.0 |
| 15:03 | 48.3 | 236.1 |
| 15:04 | 48.1 | 236.3 |
| 15:05 | 47.9 | 236.4 |
| 15:06 | 47.6 | 236.5 |
| 15:07 | 47.4 | 236.7 |
| 15:08 | 47.2 | 236.8 |
| 15:09 | 47.0 | 237.0 |
| 15:10 | 46.8 | 237.1 |
| 15:11 | 46.6 | 237.2 |
| 15:12 | 46.4 | 237.4 |
| 15:13 | 46.2 | 237.5 |
| 15:14 | 46.0 | 237.6 |
| 15:15 | 45.8 | 237.8 |
| 15:16 | 45.5 | 237.9 |
| 15:17 | 45.3 | 238.0 |
| 15:18 | 45.1 | 238.1 |
| 15:19 | 44.9 | 238.3 |
| 15:20 | 44.7 | 238.4 |
| 15:21 | 44.5 | 238.5 |
| 15:22 | 44.3 | 238.6 |
| 15:23 | 44.1 | 238.7 |
| 15:24 | 43.8 | 238.8 |
| 15:25 | 43.6 | 239.0 |
| 15:26 | 43.4 | 239.1 |
| 15:27 | 43.2 | 239.2 |
| 15:28 | 43.0 | 239.3 |

|       |      |       |
|-------|------|-------|
| 15:29 | 42.8 | 239.4 |
| 15:30 | 42.6 | 239.5 |
| 15:31 | 42.3 | 239.6 |
| 15:32 | 42.1 | 239.7 |
| 15:33 | 41.9 | 239.8 |
| 15:34 | 41.7 | 239.9 |
| 15:35 | 41.5 | 240.0 |
| 15:36 | 41.3 | 240.1 |
| 15:37 | 41.0 | 240.2 |
| 15:38 | 40.8 | 240.3 |
| 15:39 | 40.6 | 240.4 |
| 15:40 | 40.4 | 240.5 |
| 15:41 | 40.2 | 240.6 |
| 15:42 | 40.0 | 240.7 |
| 15:43 | 39.7 | 240.8 |
| 15:44 | 39.5 | 240.9 |
| 15:45 | 39.3 | 241.0 |
| 15:46 | 39.1 | 241.1 |
| 15:47 | 38.9 | 241.2 |
| 15:48 | 38.7 | 241.3 |
| 15:49 | 38.4 | 241.3 |
| 15:50 | 38.2 | 241.4 |
| 15:51 | 38.0 | 241.5 |
| 15:52 | 37.8 | 241.6 |
| 15:53 | 37.6 | 241.7 |
| 15:54 | 37.3 | 241.8 |
| 15:55 | 37.1 | 241.8 |
| 15:56 | 36.9 | 241.9 |
| 15:57 | 36.7 | 242.0 |
| 15:58 | 36.5 | 242.1 |
| 15:59 | 36.2 | 242.2 |
| 16:00 | 36.0 | 242.2 |
| 16:01 | 35.8 | 242.3 |
| 16:02 | 35.6 | 242.4 |
| 16:03 | 35.4 | 242.5 |
| 16:04 | 35.1 | 242.5 |
| 16:05 | 34.9 | 242.6 |
| 16:06 | 34.7 | 242.7 |
| 16:07 | 34.5 | 242.7 |
| 16:08 | 34.2 | 242.8 |
| 16:09 | 34.0 | 242.9 |
| 16:10 | 33.8 | 242.9 |
| 16:11 | 33.6 | 243.0 |
| 16:12 | 33.4 | 243.1 |
| 16:13 | 33.1 | 243.1 |
| 16:14 | 32.9 | 243.2 |
| 16:15 | 32.7 | 243.3 |
| 16:16 | 32.5 | 243.3 |
| 16:17 | 32.2 | 243.4 |
| 16:18 | 32.0 | 243.5 |
| 16:19 | 31.8 | 243.5 |
| 16:20 | 31.6 | 243.6 |
| 16:21 | 31.3 | 243.6 |
| 16:22 | 31.1 | 243.7 |
| 16:23 | 30.9 | 243.7 |
| 16:24 | 30.7 | 243.8 |
| 16:25 | 30.5 | 243.9 |
| 16:26 | 30.2 | 243.9 |
| 16:27 | 30.0 | 244.0 |
| 16:28 | 29.8 | 244.0 |
| 16:29 | 29.6 | 244.1 |

|       |      |       |
|-------|------|-------|
| 16:30 | 29.3 | 244.1 |
| 16:31 | 29.1 | 244.2 |
| 16:32 | 28.9 | 244.2 |
| 16:33 | 28.7 | 244.3 |
| 16:34 | 28.4 | 244.3 |
| 16:35 | 28.2 | 244.4 |
| 16:36 | 28.0 | 244.4 |
| 16:37 | 27.8 | 244.5 |
| 16:38 | 27.5 | 244.5 |
| 16:39 | 27.3 | 244.6 |
| 16:40 | 27.1 | 244.6 |
| 16:41 | 26.9 | 244.7 |
| 16:42 | 26.6 | 244.7 |
| 16:43 | 26.4 | 244.8 |
| 16:44 | 26.2 | 244.8 |
| 16:45 | 26.0 | 244.8 |
| 16:46 | 25.7 | 244.9 |
| 16:47 | 25.5 | 244.9 |
| 16:48 | 25.3 | 245.0 |
| 16:49 | 25.1 | 245.0 |
| 16:50 | 24.8 | 245.0 |
| 16:51 | 24.6 | 245.1 |
| 16:52 | 24.4 | 245.1 |
| 16:53 | 24.1 | 245.2 |
| 16:54 | 23.9 | 245.2 |
| 16:55 | 23.7 | 245.2 |
| 16:56 | 23.5 | 245.3 |
| 16:57 | 23.2 | 245.3 |
| 16:58 | 23.0 | 245.3 |
| 16:59 | 22.8 | 245.4 |
| 17:00 | 22.6 | 245.4 |
| 17:01 | 22.3 | 245.4 |
| 17:02 | 22.1 | 245.5 |
| 17:03 | 21.9 | 245.5 |
| 17:04 | 21.7 | 245.5 |
| 17:05 | 21.4 | 245.6 |
| 17:06 | 21.2 | 245.6 |
| 17:07 | 21.0 | 245.6 |
| 17:08 | 20.7 | 245.7 |
| 17:09 | 20.5 | 245.7 |
| 17:10 | 20.3 | 245.7 |
| 17:11 | 20.1 | 245.8 |
| 17:12 | 19.8 | 245.8 |
| 17:13 | 19.6 | 245.8 |
| 17:14 | 19.4 | 245.8 |
| 17:15 | 19.2 | 245.9 |
| 17:16 | 18.9 | 245.9 |
| 17:17 | 18.7 | 245.9 |
| 17:18 | 18.5 | 245.9 |
| 17:19 | 18.2 | 246.0 |
| 17:20 | 18.0 | 246.0 |
| 17:21 | 17.8 | 246.0 |
| 17:22 | 17.6 | 246.0 |
| 17:23 | 17.3 | 246.1 |
| 17:24 | 17.1 | 246.1 |
| 17:25 | 16.9 | 246.1 |
| 17:26 | 16.7 | 246.1 |
| 17:27 | 16.4 | 246.2 |
| 17:28 | 16.2 | 246.2 |
| 17:29 | 16.0 | 246.2 |
| 17:30 | 15.7 | 246.2 |

|       |      |       |
|-------|------|-------|
| 17:31 | 15.5 | 246.2 |
| 17:32 | 15.3 | 246.2 |
| 17:33 | 15.1 | 246.3 |
| 17:34 | 14.8 | 246.3 |
| 17:35 | 14.6 | 246.3 |
| 17:36 | 14.4 | 246.3 |
| 17:37 | 14.1 | 246.3 |
| 17:38 | 13.9 | 246.4 |
| 17:39 | 13.7 | 246.4 |
| 17:40 | 13.5 | 246.4 |
| 17:41 | 13.2 | 246.4 |
| 17:42 | 13.0 | 246.4 |
| 17:43 | 12.8 | 246.4 |
| 17:44 | 12.6 | 246.4 |
| 17:45 | 12.3 | 246.5 |
| 17:46 | 12.1 | 246.5 |
| 17:47 | 11.9 | 246.5 |
| 17:48 | 11.6 | 246.5 |
| 17:49 | 11.4 | 246.5 |
| 17:50 | 11.2 | 246.5 |
| 17:51 | 11.0 | 246.5 |
| 17:52 | 10.7 | 246.5 |
| 17:53 | 10.5 | 246.5 |
| 17:54 | 10.3 | 246.5 |
| 17:55 | 10.1 | 246.6 |
| 17:56 | 9.8  | 246.6 |
| 17:57 | 9.6  | 246.6 |
| 17:58 | 9.4  | 246.6 |
| 17:59 | 9.1  | 246.6 |
| 18:00 | 8.9  | 246.6 |
| 18:01 | 8.7  | 246.6 |
| 18:02 | 8.5  | 246.6 |
| 18:03 | 8.2  | 246.6 |
| 18:04 | 8.0  | 246.6 |
| 18:05 | 7.8  | 246.6 |
| 18:06 | 7.6  | 246.6 |
| 18:07 | 7.3  | 246.6 |
| 18:08 | 7.1  | 246.6 |
| 18:09 | 6.9  | 246.6 |
| 18:10 | 6.7  | 246.6 |
| 18:11 | 6.4  | 246.6 |
| 18:12 | 6.2  | 246.6 |
| 18:13 | 6.0  | 246.6 |
| 18:14 | 5.8  | 246.6 |
| 18:15 | 5.5  | 246.6 |
| 18:16 | 5.3  | 246.6 |
| 18:17 | 5.1  | 246.6 |
| 18:18 | 4.9  | 246.6 |
| 18:19 | 4.6  | 246.6 |
| 18:20 | 4.4  | 246.6 |
| 18:21 | 4.2  | 246.6 |
| 18:22 | 4.0  | 246.6 |
| 18:23 | 3.7  | 246.6 |
| 18:24 | 3.5  | 246.6 |
| 18:25 | 3.3  | 246.6 |
| 18:26 | 3.1  | 246.6 |
| 18:27 | 2.9  | 246.6 |
| 18:28 | 2.7  | 246.6 |
| 18:29 | 2.4  | 246.6 |
| 18:30 | 2.2  | 246.6 |
| 18:31 | 2.0  | 246.6 |

|       |       |       |
|-------|-------|-------|
| 18:32 | 1.8   | 246.6 |
| 18:33 | 1.6   | 246.6 |
| 18:34 | 1.4   | 246.6 |
| 18:35 | 1.2   | 246.6 |
| 18:36 | 1.0   | 246.6 |
| 18:37 | 0.8   | 246.6 |
| 18:38 | 0.6   | 246.6 |
| 18:39 | 0.4   | 246.5 |
| 18:40 | 0.2   | 246.5 |
| 18:41 | -0.0  | 246.5 |
| 18:42 | -0.8  | 246.5 |
| 18:43 | -1.0  | 246.5 |
| 18:44 | -1.3  | 246.5 |
| 18:45 | -1.5  | 246.5 |
| 18:46 | -1.7  | 246.5 |
| 18:47 | -2.0  | 246.5 |
| 18:48 | -2.2  | 246.4 |
| 18:49 | -2.4  | 246.4 |
| 18:50 | -2.6  | 246.4 |
| 18:51 | -2.9  | 246.4 |
| 18:52 | -3.1  | 246.4 |
| 18:53 | -3.3  | 246.4 |
| 18:54 | -3.6  | 246.4 |
| 18:55 | -3.8  | 246.3 |
| 18:56 | -4.0  | 246.3 |
| 18:57 | -4.2  | 246.3 |
| 18:58 | -4.5  | 246.3 |
| 18:59 | -4.7  | 246.3 |
| 19:00 | -4.9  | 246.3 |
| 19:01 | -5.2  | 246.2 |
| 19:02 | -5.4  | 246.2 |
| 19:03 | -5.6  | 246.2 |
| 19:04 | -5.8  | 246.2 |
| 19:05 | -6.1  | 246.2 |
| 19:06 | -6.3  | 246.1 |
| 19:07 | -6.5  | 246.1 |
| 19:08 | -6.8  | 246.1 |
| 19:09 | -7.0  | 246.1 |
| 19:10 | -7.2  | 246.1 |
| 19:11 | -7.4  | 246.0 |
| 19:12 | -7.7  | 246.0 |
| 19:13 | -7.9  | 246.0 |
| 19:14 | -8.1  | 246.0 |
| 19:15 | -8.4  | 246.0 |
| 19:16 | -8.6  | 245.9 |
| 19:17 | -8.8  | 245.9 |
| 19:18 | -9.0  | 245.9 |
| 19:19 | -9.3  | 245.9 |
| 19:20 | -9.5  | 245.8 |
| 19:21 | -9.7  | 245.8 |
| 19:22 | -10.0 | 245.8 |
| 19:23 | -10.2 | 245.7 |
| 19:24 | -10.4 | 245.7 |
| 19:25 | -10.6 | 245.7 |
| 19:26 | -10.9 | 245.7 |
| 19:27 | -11.1 | 245.6 |
| 19:28 | -11.3 | 245.6 |
| 19:29 | -11.5 | 245.6 |
| 19:30 | -11.8 | 245.5 |
| 19:31 | -12.0 | 245.5 |

[Back to form](#)

Painel Pilao Excavation Material Catalog .xlsx

| Site            | Unit | Level | Prov.Orig | Prov. New | Total Weight (grams) | Total number of pieces | Catalog photo numbers   |
|-----------------|------|-------|-----------|-----------|----------------------|------------------------|-------------------------|
| Painel Do Pilão | 1    | 1     | 20111     | 20110101  | 1422                 | 1                      | 103-0067-72             |
| Painel Do Pilão | 1    | 1     | 20111     | 20110101  | 341                  | 1                      | 103-0074-79             |
| Painel Do Pilão | 1    | 1     | 20111     | 20110101  | 92                   | 1                      | 103-0081-84             |
| Painel Do Pilão | 1    | 1     | 20111     | 20110101  | 41                   | 7                      | 103-0086-89             |
| Painel Do Pilão | 1    | 1     | 20111     | 20110101  |                      |                        |                         |
| Painel Do Pilão | 1    | 2     | 20112     | 20110102  | 3311                 | 56                     | 101-0001to101-0006      |
| Painel Do Pilão | 1    | 3     | 20113     | 20110103  | 45                   | 3                      | 103-0211-4              |
| Painel Do Pilão | 1    | 3     | 20113     | 20110103  | 563                  | 1                      | 103-0091-94             |
| Painel Do Pilão | 1    | 3     | 20113     | 20110103  | 402                  | 4                      | 103-0096-100            |
| Painel Do Pilão | 1    | 3     | 20113     | 20110103  | 480                  | 2                      | 103-0102-5, 103-0108-11 |
| Painel Do Pilão | 1    | 3     | 20113     | 20110103  | 82                   | 1                      | 103-0124-7              |
| Painel Do Pilão | 1    | 3     | 20113     | 20110103  | 31                   | 1                      | 103-0176-9              |
| Painel Do Pilão | 1    | 3     | 20113     | 20110103  | 81                   | 1                      | 103-0201-4              |
| Painel Do Pilão | 1    | 3     | 20113     | 20110103  | 65                   | 1                      | 103-0134-7              |
| Painel Do Pilão | 1    | 3     | 20113     | 20110103  | 295                  | 1                      | 103-0112-5              |
| Painel Do Pilão | 1    | 3     | 20113     | 20110103  | 58                   | 1                      | 103-0181-6              |
| Painel Do Pilão | 1    | 3     | 20113     | 20110103  | 66                   | 3                      | 103-0149-52             |
| Painel Do Pilão | 1    | 3     | 20113     | 20110103  | 66                   | 1                      | 103-0139-42             |
| Painel Do Pilão | 1    | 3     | 20113     | 20110103  | 86                   | 1                      | 103-0193-6              |
| Painel Do Pilão | 1    | 3     | 20113     | 20110103  | 88                   | 1                      | 103-0171-4              |
| Painel Do Pilão | 1    | 3     | 20113     | 20110103  | 39                   | 1                      | 103-0144-7              |
| Painel Do Pilão | 1    | 3     | 20113     | 20110103  | 65                   | 1                      | 103-0161-4              |
| Painel Do Pilão | 1    | 3     | 20113     | 20110103  | 599                  | 1                      | 103-0117-22             |
| Painel Do Pilão | 1    | 3     | 20113     | 20110103  | 43                   | 1                      | 103-0187-91             |
| Painel Do Pilão | 1    | 3     | 20113     | 20110103  | 151                  | 1                      | 103-0206-9              |
| Painel Do Pilão | 1    | 3     | 20113     | 20110103  | 62                   | 1                      | 103-0166-9              |
| Painel Do Pilão | 1    | 3     | 20113     | 20110103  | 319                  | 1                      | 103-0129-32             |
| Painel Do Pilão | 1    | 3     | 20113     | 20110103  | 52                   | 1                      | 103-0198-9              |
| Painel Do Pilão | 1    | 3     | 20113     | 20110103  | 118                  | 6                      | 103-0216-9              |



Painel Pilao Excavation Material Catalog .xlsx

| Site            | Unit | Level | Prov.Orig | Prov. New | Total Weight (grams) | Total number of pieces | Catalog photo numbers |
|-----------------|------|-------|-----------|-----------|----------------------|------------------------|-----------------------|
| Painel Do Pilão | 1    | 3     | 20113     | 20110103  | 80                   | 1                      | 103-0154-8            |
| Painel Do Pilão | 1    | 3     | 20113     | 20110103  | 2237                 | 243                    | 101-0008-11,14-17     |
| Painel Do Pilão | 1    | 4     | 20115     | 20110104  | 336                  | 1                      | 103-0250-6            |
| Painel Do Pilão | 1    | 4     | 20115     | 20110104  | 741                  | 1                      | 103-0229-38           |
| Painel Do Pilão | 1    | 4     | 20115     | 20110104  | 1069                 | 1                      | 103-0245-8            |
| Painel Do Pilão | 1    | 4     | 20115     | 20110104  | 248                  | 2                      | 103-0258-63           |
| Painel Do Pilão | 1    | 4     | 20115     | 20110104  | 302                  | 1                      | 103-0240-3            |
| Painel Do Pilão | 1    | 4     | 20115     | 20110104  | 2512                 | 121                    | 101-0020-23           |
| Painel Do Pilão | 1    | 5     | 20116     | 20110105  | 524                  | 1                      | 103-0300-7            |
| Painel Do Pilão | 1    | 5     | 20116     | 20110105  | 683                  | 1                      | 103-0325-34           |
| Painel Do Pilão | 1    | 5     | 20116     | 20110105  | 260                  | 1                      | 103-0316-23           |
| Painel Do Pilão | 1    | 5     | 20116     | 20110105  | 326                  | 1                      | 103-0309-14           |
| Painel Do Pilão | 1    | 5     | 20116     | 20110105  | 249                  | 1                      | 103-0278-83           |
| Painel Do Pilão | 1    | 5     | 20116     | 20110105  | 433                  | 1                      | 103-0285-90           |
| Painel Do Pilão | 1    | 5     | 20116     | 20110105  | 120                  | 1                      | 103-0271-6            |
| Painel Do Pilão | 1    | 5     | 20116     | 20110105  | 402                  | 1                      | 103-0292-7            |
| Painel Do Pilão | 1    | 5     | 20116     | 20110105  | 2100                 | 1                      | 103-0336-43           |
| Painel Do Pilão | 1    | 5     | 20116     | 20110105  | 109                  | 2                      | 103-0265-9            |
| Painel Do Pilão | 1    | 5     | 20116     | 20110105  | 51                   | 1                      | 103-0346-9            |
| Painel Do Pilão | 1    | 5     | 20116     | 20110105  | 110                  | 1                      | 103-0351-4            |
| Painel Do Pilão | 1    | 5     | 20116     | 20110105  | 151                  | 1                      | 103-0356-9            |
| Painel Do Pilão | 1    | 5     | 20116     | 20110105  | 510                  | 1                      | 103-0368-73           |
| Painel Do Pilão | 1    | 5     | 20116     | 20110105  | 9                    | 1                      | 103-0361-6            |
| Painel Do Pilão | 1    | 5     | 20116     | 20110105  | 154                  | 1                      | 103-0382-9            |
| Painel Do Pilão | 1    | 5     | 20116     | 20110105  | 341                  | 1                      | 103-0375-80           |
| Painel Do Pilão | 1    | 5     | 20116     | 20110105  | 122                  | 1                      | 103-0391-9            |
| Painel Do Pilão | 1    | 5     | 20116     | 20110105  | 86                   | 1                      | 103-0401-6            |
| Painel Do Pilão | 1    | 5     | 20116     | 20110105  | 3696                 | 133                    | 101-0025-29,31-35     |
| Painel Do Pilão | 1    | 6     | 20117     | 20110106  | 134                  | 1                      | 103-0412-19           |

Painel Pilao Excavation Material Catalog .xlsx

| Site            | Unit | Level | Prov.Orig    | Prov. New  | Total Weight (grams) | Total number of pieces | Catalog photo numbers   |
|-----------------|------|-------|--------------|------------|----------------------|------------------------|-------------------------|
| Painel Do Pilão | 1    | 6     | 20117        | 20110106   | 132                  | 1                      | 103-0422-7              |
| Painel Do Pilão | 1    | 6     | 20117        | 20110106   | 88                   | 1                      | 103-0430-3              |
| Painel Do Pilão | 1    | 6     | 20117        | 20110106   | 76                   | 1                      | 103-0435-8              |
| Painel Do Pilão | 1    | 6     | 20117        | 20110106   | 57                   | 1                      | 103-0440-7              |
| Painel Do Pilão | 1    | 6     | 20117        | 20110106   | 1240                 | 1                      | 103-0487-93             |
| Painel Do Pilão | 1    | 6     | 20117        | 20110106   | 1000                 | 1                      | 103-0495-504            |
| Painel Do Pilão | 1    | 6     | 20117        | 20110106   | 181                  | 1                      | 103-0449-56             |
| Painel Do Pilão | 1    | 6     | 20117        | 20110106   | 420                  | 1                      | 103-0506-16             |
| Painel Do Pilão | 1    | 6     | 20117        | 20110106   | 380                  | 2                      | 103-0458-73             |
| Painel Do Pilão | 1    | 6     | 20117        | 20110106   | 125                  | 1                      | 103-0475-80             |
| Painel Do Pilão | 1    | 6     | 20117        | 20110106   | 43                   | 1                      | 103-0482-5              |
| Painel Do Pilão | 1    | 6     | 20117 (2013) | 20110106   | 253                  | 13                     | 101-0134-9              |
| Painel Do Pilão | 1    | 6     | 20117 (2013) | 20110106   | 657                  | 13                     | 101-0141-6              |
| Painel Do Pilão | 1    | 6     | 20117 (2013) | 20110106   | 581                  | 7                      | 103-0002-7              |
| Painel Do Pilão | 1    | 6     | 20117 (2012) | 20110106.1 | 2342                 | 74                     | 101-0045-50             |
| Painel Do Pilão | 1    | 6     | 20117 (2012) | 20110106.2 | 1492                 | 78                     | 101--0052-58            |
| Painel Do Pilão | 1    | 6     | 20117        | 20110106   | 2718                 | 38                     | 101-0037-43             |
| Painel Do Pilão | 1    | 7     | 20118        | 20110107   | 1530                 | 1                      | 103-0518-32             |
| Painel Do Pilão | 1    | 7     | 20118        | 20110107   | 1100                 | 1                      | 103-0611-4; 103-6742-9  |
| Painel Do Pilão | 1    | 7     | 20118        | 20110107   | 14                   | 1                      | 103-0591-5; 103-6659-64 |
| Painel Do Pilão | 1    | 7     | 20118        | 20110107   | 15                   | 3                      | 103-0550-7; 103-6665-7  |
| Painel Do Pilão | 1    | 7     | 20118        | 20110107   | 74                   | 1                      | 103-0598-603; 103-6668- |
| Painel Do Pilão | 1    | 7     | 20118        | 20110107   | 16                   | 1                      | 103-0559-62; 103-6677-8 |
| Painel Do Pilão | 1    | 7     | 20118        | 20110107   | 63                   | 1                      | 103-0606-9; 103-6684-91 |
| Painel Do Pilão | 1    | 7     | 20118        | 20110107   | 1233                 | 1                      | 103-0534-41             |
| Painel Do Pilão | 1    | 7     | 20118        | 20110107   | 23                   | 1                      | 103-0564-7103-6692-9    |
| Painel Do Pilão | 1    | 7     | 20118        | 20110107   | 176                  | 1                      | 103-0569-74             |
| Painel Do Pilão | 1    | 7     | 20118        | 20110107   | 90                   | 1                      | 103-0576-9; 103-6700-5  |
| Painel Do Pilão | 1    | 7     | 20118        | 20110107   | 2350                 | 1                      | 103-0543-48             |

Painel Pilao Excavation Material Catalog .xlsx

| Site            | Unit | Level     | Prov.Orig    | Prov. New  | Total Weight (grams) | Total number of pieces | Catalog photo numbers   |
|-----------------|------|-----------|--------------|------------|----------------------|------------------------|-------------------------|
| Painel Do Pilão | 1    | 7         | 20118        | 20110107   | 855                  | 2                      | 103-0616-22; 103-6734-4 |
| Painel Do Pilão | 1    | 7         | 20118        | 20110107   | 154                  | 1                      | 103-0581-9; 103-6715-33 |
| Painel Do Pilão | 1    | 7         | 20118 (2012) | 20110107.1 | 3502                 | 48                     | 101-0067-72             |
| Painel Do Pilão | 1    | 7         | 20118 (2013) | 20110107   | 1207                 | 4                      | 103-0010-15             |
| Painel Do Pilão | 1    | 7         | 20118 (2013) | 20110107   | 2686                 | 19                     | 103-0018-23             |
| Painel Do Pilão | 1    | 7         | 20118 (2013) | 20110107   | 1070                 | 37                     | 103-0026-31             |
| Painel Do Pilão | 1    | 7         | 20118 (2013) | 20110107   | 1557                 | 4                      | 103-0034-38             |
| Painel Do Pilão | 1    | 7         | 20118 (2012) | 20110107   |                      | 124                    | 103-0057-61             |
| Painel Do Pilão | 1    | 7         | 20118 (2012) | 20110107.2 | 1788                 | 109                    | 101-0074-79             |
| Painel Do Pilão | 1    | 7         | 20118 (2012) | 20110107.4 | 314                  | 79                     | 101-0091-94             |
| Painel Do Pilão | 1    | 7         | 20118 (2012) | 20110107.3 | 2113                 | 91                     | 101-0081-86             |
| Painel Do Pilão | 1    | 7         | 20118        | 20110107   | 3215                 | 67                     | 101-0060-65             |
| Painel Do Pilão | 1    | 8         | 20119        | 20110108   | 215                  | 1                      | 103-0625-32             |
| Painel Do Pilão | 1    | 8         | 20119        | 20110108   | 1202                 | 1                      | 103-0634-41             |
| Painel Do Pilão | 1    | 8         | 20119        | 20110108   | 775                  | 2                      | 103-0643-8              |
| Painel Do Pilão | 1    | 8         | 20119        | 20110108   | 75                   | 1                      | 103-0658-67             |
| Painel Do Pilão | 1    | 8         | 20119        | 20110108   | 65                   | 2                      | 103-0669-73             |
| Painel Do Pilão | 1    | 8         | 20119        | 20110108   | 782                  | 1                      | 103-0651-6              |
| Painel Do Pilão | 1    | 8         | 20119        | 20110108   | 743                  | 1                      | 103-0686-91             |
| Painel Do Pilão | 1    | 8         | 20119        | 20110108   | 20                   | 2                      | 103-0675-8              |
| Painel Do Pilão | 1    | 8         | 20119        | 20110108   | 80                   | 3                      | 103-0680-4              |
| Painel Do Pilão | 1    | 8         | 20119        | 20110108   | 4288                 | 26                     | 101-0097-103            |
| Painel Do Pilão | 1    | 8         | 20119        | 20110108   | 1354                 | 111                    | 101-0105-110            |
| Painel Do Pilão | 1    | 8         | 20119 (2014) | 20110108   | 2386                 | 20                     | 103-0041-46             |
| Painel Do Pilão | 1    | 8         | 20119 (2014) | 20110108   | 2312                 | 9                      | 103-0049-54             |
| Painel Do Pilão | 1    | 9         | 20119 (2012) | 20110109   | 1506                 | 36                     | 101-0127-32             |
| Painel Do Pilão | 1    | 3b        | 20114        | 20110103.1 | 171                  | 3                      | 103-0221-4              |
| Painel Do Pilão | 1    | cave wall | 20110 (2012) | 20110100.3 | 1442                 | 4                      | 101-0120-125            |
| Painel Do Pilão | 1    | slip wall | 20110 (2012) | 20110100.2 | 822                  | 14                     | 101-0112-18             |

Painel Pilao Excavation Material Catalog .xlsx

| Site | Unit | Level | Prov.Orig | Prov. New | Total Weight (grams) | Total number of pieces | Catalog photo numbers |
|------|------|-------|-----------|-----------|----------------------|------------------------|-----------------------|
|      |      |       |           |           | 80430                | 1688                   |                       |

Painel Pilao Excavation Material Catalog .xlsx

| Level | Catalog Video Number | Object # |
|-------|----------------------|----------|
| 1     | 103-0073             | 1        |
| 1     | 103-0080             | 2        |
| 1     | 103-0085             | 3        |
| 1     | 103-0090             | -        |
| 1     |                      |          |
| 2     | 101-0007             |          |
| 3     | 103-0215             | 1        |
| 3     | 103-0095             | 3        |
| 3     | 103-0101             | 4        |
| 3     | 103-0106-7           | 5        |
| 3     | 103-0128             | 6        |
| 3     | 103-0180             | 7        |
| 3     | 103-0205             | 8        |
| 3     | 103-0138             | 9        |
| 3     | 103-0116             | 10       |
| 3     | 103-0187             | 11       |
| 3     | 103-0153             | 12       |
| 3     | 103-0143             | 13       |
| 3     | 103-0197             | 14       |
| 3     | 103-0175             | 15       |
| 3     | 103-0148             | 16       |
| 3     | 103-0165             | 17       |
| 3     | 103-0123             | 18       |
| 3     | 103-0192             | 19       |
| 3     | 103-0210             | 20       |
| 3     | 103-0170             | 21       |
| 3     | 103-0133             | 22       |
| 3     | 103-0200             | 23       |
| 3     | 103-0220             | 24       |

Painel Pilao Excavation Material Catalog .xlsx

| Level | Catalog Video Number | Object # |
|-------|----------------------|----------|
| 3     | 103-0159-60          | 26       |
| 3     | 101-0012,13,18,19    |          |
| 4     | 103-0257             | 5        |
| 4     | 103-0239             | 6        |
| 4     | 103-0249             | 9        |
| 4     | 103-0264             | 10       |
| 4     | 103-0244             | 11       |
| 4     | 101-0024             |          |
| 5     | 103-0308             | 1        |
| 5     | 103-0335             | 2        |
| 5     | 103-0324             | 3        |
| 5     | 103-0315             | 4        |
| 5     | 103-0284             | 5        |
| 5     | 103-0291             | 6        |
| 5     | 103-0277             | 7        |
| 5     | 103-0298-9           | 8        |
| 5     | 103-0344-5           | 9        |
| 5     | 103-0270             | 10       |
| 5     | 103-0350             | 11       |
| 5     | 103-0355             | 12       |
| 5     | 103-0360             | 13       |
| 5     | 103-0374             | 14       |
| 5     | 103-0367             | 15       |
| 5     | 103-0390             | 16       |
| 5     | 103-0381             | 17       |
| 5     | 103-0400             | 18       |
| 5     | 103-0407             | 21       |
| 5     | 101-0030,36          |          |
| 6     | 103-0420-1           | 1        |

Painel Pilao Excavation Material Catalog .xlsx

| Level | Catalog Video Number | Object #    |
|-------|----------------------|-------------|
| 6     | 103-0428-9           | 2           |
| 6     | 103-0434             | 3           |
| 6     | 103-0439             | 5           |
| 6     | 103-0448             | 6           |
| 6     | 103-0494             | 7           |
| 6     | 103-0505             | 9           |
| 6     | 103-0457             | 10          |
| 6     | 103-0517             | 11          |
| 6     | 103-0474             | 13          |
| 6     | 103-0481             | 14          |
| 6     | 103-0486             | 16          |
| 6     | 101-0140             | f1          |
| 6     | 101-0147-8, 103      | f3          |
| 6     | 103-0008-9           | f4          |
| 6     | 101-0051             | T region    |
| 6     | 101-0059             | UVWZ region |
| 6     | 101-0044             |             |
| 7     | 103-0533             | 1           |
| 7     | 103-0615             | 3           |
| 7     | 103-0596-7           | 4           |
| 7     | 103-0558             | 5           |
| 7     | 103-0604-5           | 6           |
| 7     | 103-0563             | 7           |
| 7     | 103-0610             | 8           |
| 7     | 103-0542             | 9           |
| 7     | 103-0568             | 11          |
| 7     | 103-0575             | 12          |
| 7     | 103-0580             | 15          |
| 7     | 103-0549             | 16          |

Painel Pilao Excavation Material Catalog .xlsx

| Level     | Catalog Video Number | Object #          |
|-----------|----------------------|-------------------|
| 7         | 103-0623-4; 103      | 18                |
| 7         | 103-0590             | 19                |
| 7         | 101-0073             | EFG region        |
| 7         | 103-0016-17          | f5                |
| 7         | 103-0024-25          | f6                |
| 7         | 103-0032-33          | f7                |
| 7         | 103-0039-40          | f9                |
| 7         | 103-0062             | fragiles (level)  |
| 7         | 101-0080             | M region          |
| 7         | 101-0095-96          | Screened east     |
| 7         | 101-0087-90          | X,Y region        |
| 7         | 101-0066             |                   |
| 8         | 103-0633             | 1                 |
| 8         | 103-0642             | 2                 |
| 8         | 103-0649-50          | 4                 |
| 8         | 103-0668             | 6                 |
| 8         | 103-0674             | 7                 |
| 8         | 103-0657             | 8                 |
| 8         | 103-0692             | 10                |
| 8         | 103-0679             | 11                |
| 8         | 103-0685             | 12                |
| 8         | 101-0104             | (macroliths)      |
| 8         | 101-0111             | (microliths)      |
| 8         | 103-0047-48          | f10               |
| 8         | 103-0055-56          | f11               |
| 9         | 101-0133             | base of level     |
| 3b        | 103-0227-8           | -                 |
| cave wall | 101-0126             | cave wall profile |
| slip wall | 101-0119             | slip wall profile |



Painel Pilao Excavation Material Catalog .xlsx

| Level | Catalog Video Number | Object # |
|-------|----------------------|----------|
|       |                      |          |

Painel Pilao Excavation Material Catalog .xlsx

| Level |                                                                                                                                                               |
|-------|---------------------------------------------------------------------------------------------------------------------------------------------------------------|
| 1     | large flake bulb with 3 or 4 front bore holes- in form of stalactite. Silicified sandstone- almost mistaken for limestone                                     |
| 1     | re-shaped quartz breccia wedge with right angles                                                                                                              |
| 1     | polished pink chalcedony hand axe                                                                                                                             |
| 1     | screened lithic objects included 1 broken sandstone flake, 1 silicified dagger flake, 1 curved quartz scoop flake, 1 dark feathered flake, 1 dark rectangular |
| 1     |                                                                                                                                                               |
| 2     |                                                                                                                                                               |
| 3     | 2 grey/white lunate-shaped blades and 1 short triangle wedge (chalcedony-like)                                                                                |
| 3     | left-handed quartz breccia hand axe                                                                                                                           |
| 3     | a single sandstone object at first but broke into 4 pieces. Had shape similar to a hip bone                                                                   |
| 3     | orange sandstone hand axe. Fragments broke off. Also includes a bizarre burned or melted "sap" or jutaíça                                                     |
| 3     | pink quartz breccia curved triangular flake with linear scar and top cortex                                                                                   |
| 3     | white hand-held knife?                                                                                                                                        |
| 3     | flat thin orange sandstone (axe or planar scraper/polisher) right thumb impression                                                                            |
| 3     | white quartz breccia knife blade with black spot                                                                                                              |
| 3     | long grey sickle made from quartz breccia                                                                                                                     |
| 3     | white hand-held (left-handed) "shank" knife                                                                                                                   |
| 3     | 3 different pieces of red rock- possible pigment source- hardened clay or tabatinga or carbonized iron. One piece is smooth and melted-looking. Other         |
| 3     | white silicified sandstone long edge knife with short edge grip- left hand                                                                                    |
| 3     | pink quartz breccia with green tong- hafted end scraper (that's why tong end is greenish)                                                                     |
| 3     | pinkish quartz breccia- long thin sidescraper. Slightly curved                                                                                                |
| 3     | white silicified sandstone triangle point. The edges down to the point have been thinned on one side, tapering with only about 2mm. Also a little bit         |
| 3     | grey/tan quartz breccia hand-held (right-handed) sidescraper (probably wood)                                                                                  |
| 3     | white quartz crystal spade- could just be a broken rock                                                                                                       |
| 3     | grey/white silicified sandstone thin blade notched (or possibly side scraper). Darkside seems a bit polished                                                  |
| 3     | pale white coarse sandstone/breccia (scraper or chopper?) left-handed                                                                                         |
| 3     | polished white quartz breccia "knee-cap" stone. Maybe for scraping or polishing                                                                               |
| 3     | white long axe with red bar mark. Silicified sandstone. Red mark is about 15mm by 34mm. Also has horizontal linear feature on same red mark side,             |
| 3     | grey coarse sandstone (abraider?)                                                                                                                             |
| 3     | all silicified sandstones: 2 unknown tabulars, 2 projectile points, 1 blade broken in 2 pieces                                                                |

Painel Pilao Excavation Material Catalog .xlsx

| Level |                                                                                                                                                             |
|-------|-------------------------------------------------------------------------------------------------------------------------------------------------------------|
| 3     | grey silicified sandstone/quartz border-blade. Sidescraper (probably wood) tapered on one side for ~2mm then thick middle, then long non-sharp              |
| 3     |                                                                                                                                                             |
| 4     | large quartz breccia flake, could have been broken-off from something bigger. Tappers down to what appears like a tang in the middle. Potential re          |
| 4     | sandstone conglomerate - beige: hafted or right-handed (unsure) could be side scraper but most likely used against other stone.                             |
| 4     | large biface silicified sandstone with vertical scar and oval-triangle impact                                                                               |
| 4     | long sandstone sickle (broke into 2 pieces). Was orangeish but now sand colored. Interior edge sharp                                                        |
| 4     | silicified sandstone endscraper (or axe head) hafted or handheld (right hand)                                                                               |
| 4     |                                                                                                                                                             |
| 5     | large blue-ish when moist, silicified sandstone flake with scar at bulb of percussion. Cortex surface has right-handheld features (left possible but less   |
| 5     | large beige silicified sandstone one-end bottom reduced, top tapered (2cm) wedge (endscraper or handaxe- left or right hand) flake with dual vertic         |
| 5     | silicified sandstone, some breccia, small hafted axe head. (No signs of endscraper use). Bulb of percussion has signs of hafting articulation. Also corte   |
| 5     | large triangular silicified sandstone flake with central vertical scar and triangular bulb of percussion. Evidence of pale beige clay or mud splashes on s  |
| 5     | pinkish-beige quartz breccia teardrop flake with vertical scar greatly truncated on one side, tapered to a sharp edge on other side (possible right-ha      |
| 5     | large beige silicified sandstone ~360° retouched leaflet flake (spade). Evidence of hafting or left-handheld.                                               |
| 5     | pinkish-beige silicified sandstone tear drop flake with vertical scar. (perforator, side scraper, or saw. Evidence for hafting on bulb (left-handed if han  |
| 5     | large beige silicified sandstone one-edge retouched (6cm) wedge flake with vertical scar nearly at edge. Evidence of vertical hafting scar toward cent      |
| 5     | Grand triangular bulb stalactite-like flake. Beige silicified sandstone. Vertical center scar reworkd, signs of chipping at endpoint. Side flaked off a mic |
| 5     | pink sandstone was smoothed on all sides but pinched in the middle. Now broke into 2 pieces and of little value                                             |
| 5     | pinkish-beige silicified sandstone leaflet flake with center vertical scar interrupted by center pentagonal surface. Double-edge sharp with broken off      |
| 5     | medium brown medium-coarse sandstone (limace-shaped or jaguar-paw) abraider/polisher? With two vertical linear grooves                                      |
| 5     | red and yellow (and dark brown) compacted sandstone tablet with border design and rim shaping (strange- seems almost like a piece of a large cera           |
| 5     | dirt brown quartz breccia cleaver. Single edge but dual use-top for cleaving, bottom for cutting. Dark lines drawn could be termite trails or human m       |
| 5     | dirty brown silicified sandstone triangular blade projectile point with retouch for hafting, and vertical center scar                                       |
| 5     |                                                                                                                                                             |
| 5     | beige (slight pink) quartz breccia axe head. Either hafting broke off or was left-handheld. Dark line on surface could be guidemark or termite trail        |
| 5     | dirt brown semi silicified and semi quartz breccia elongated perforator/chisel/wedge blade. Signs of mud splash at chisel end. Slight signs of squashi      |
| 5     | dirt brown/beige elongated leaflet flake with vertical scar and flattened double edges. Forked tang is sharper than projectile end (suggests heavily u      |
| 5     |                                                                                                                                                             |
| 6     | pale brown silicified sandstone wedge flake polished on one side with reducing scars and possible hafting smudges, but use unverifiable. Gradual tap        |

Painel Pilao Excavation Material Catalog .xlsx

| Level |                                                                                                                                                         |
|-------|---------------------------------------------------------------------------------------------------------------------------------------------------------|
| 6     | pale brown quartz breccia wedge flake smoothed surface right-angle edges except sharp edge. opposite sharp edge has trough dugout but not tapered       |
| 6     | dark brown (still wet) silicified sandstone/conglomerate round axe, probably hafted but if not, righthanded with thumb impression                       |
| 6     | yellowish-orangeish brown compacted sandstone blade. Thinned on all sides, thick where vertical flake scar should be, but removed. Uncertain how        |
| 6     | tan/orange brown pick axe flake. Articulates best with a small left hand, perhaps a kid or small female. Bulb of percussion is angled and therefore no  |
| 6     | Large orange sandstone bulbous flake with vertical groove + indentation, and horizontal groove + indentation until vertical groove. Back end also gro   |
| 6     | large red and yellow quadrangular tablet- sandstone                                                                                                     |
| 6     | medium brown silicified hand axe right or left hand but left more comfortable. Evidence of retouch on bottom edge. Chopping edge has signs of chip      |
| 6     | large dirt to medium brown silicified sandstone core with hints of melting or polishing (heat treated?) on one pentagonal surface. Bottom of base fa    |
| 6     | pale to dirt to medium brown pair. One large horizontal axe head with backing retouch suggesting heavy lashing during hafting. Small piece also sho     |
| 6     |                                                                                                                                                         |
| 6     | pale to dirt brown silicified sandstone slight flake scare near straight edge, opposite edge serrated. Groove on bottom and indentation, narrowing o    |
| 6     |                                                                                                                                                         |
| 6     |                                                                                                                                                         |
| 6     |                                                                                                                                                         |
| 6     |                                                                                                                                                         |
| 6     |                                                                                                                                                         |
| 6     |                                                                                                                                                         |
| 7     | tan-orange compacted, slightly silicified sandstone quadrangular brick with nearly square notch. Opposite side of notch was smoothed, but now spl       |
| 7     |                                                                                                                                                         |
| 7     | yellowish tan silicified sandstone projectile point reduced or retouched on all sides and symmetric top with underside. Notched backing and pinched     |
| 7     | three small pieces of orange, red and slight yellow clay-like sandstone or shale. Potentially used as pigment                                           |
| 7     |                                                                                                                                                         |
| 7     | coarse-grained medium brown sandstone interior concave groove. Seems like a re-formed handle or adorno of a vessel                                      |
| 7     |                                                                                                                                                         |
| 7     |                                                                                                                                                         |
| 7     | pale to medium brown silicified sandstone projectile point, retouched almost all around, seemingly broken and worn down at one corner now. Simil        |
| 7     |                                                                                                                                                         |
| 7     | tan-beige silicified sandstone hook blade (potentially heat-treated). All edges retouched and tapered about 2 to 1 cm all around. Linear dark mark ne   |
| 7     | Jaguar paw - large pale brown quartz breccia flake with at least 6 chiseled or grooved vertical marks. End tapers to axe-like edge. Heavy to wield, hea |

Painel Pilao Excavation Material Catalog .xlsx

| Level     |                                                                                                                                                            |
|-----------|------------------------------------------------------------------------------------------------------------------------------------------------------------|
| 7         |                                                                                                                                                            |
| 7         |                                                                                                                                                            |
| 7         |                                                                                                                                                            |
| 7         |                                                                                                                                                            |
| 7         |                                                                                                                                                            |
| 7         |                                                                                                                                                            |
| 7         |                                                                                                                                                            |
| 7   7)    |                                                                                                                                                            |
| 7         |                                                                                                                                                            |
| 7         | 7: corner                                                                                                                                                  |
| 7         |                                                                                                                                                            |
| 7         |                                                                                                                                                            |
| 8         | pinkish-beige silicified sandstone with orange-ish coating, either polished, burnished or painted. Concave curved axe-like flake with vertical flake scar  |
| 8         |                                                                                                                                                            |
| 8         |                                                                                                                                                            |
| 8         | was red but now orange with slight reddish tinge, rectangular slab of sandy clay. Presumably used as paint. One edge and platform bottom is very smooth    |
| 8         | orangeish coating pinkish silicified sandstone triangular flake with retouch on one side, underside is angularized and leveled flat. Tip broke off, so now |
| 8         |                                                                                                                                                            |
| 8         |                                                                                                                                                            |
| 8         |                                                                                                                                                            |
| 8         | pale beige sandstone with one side well polished or vitrified. Also contains purple mark. Rectangular ovoid but broken in two pieces. Edges rounded        |
| 8         |                                                                                                                                                            |
| 8         |                                                                                                                                                            |
| 8         |                                                                                                                                                            |
| 8         |                                                                                                                                                            |
| 9         | 8 lithics                                                                                                                                                  |
| 3b        |                                                                                                                                                            |
| cave wall | file lithics                                                                                                                                               |
| slip wall | ile lithics                                                                                                                                                |

Painel Pilao Excavation Material Catalog .xlsx

| Level |  |
|-------|--|
|       |  |



Painel Pilao Excavation Material Catalog .xlsx

|       |   |                                                                                                                                          |  |  |  |  |  |  |  |  |
|-------|---|------------------------------------------------------------------------------------------------------------------------------------------|--|--|--|--|--|--|--|--|
| Level |   |                                                                                                                                          |  |  |  |  |  |  |  |  |
|       | 3 | her side                                                                                                                                 |  |  |  |  |  |  |  |  |
|       | 3 |                                                                                                                                          |  |  |  |  |  |  |  |  |
|       | 4 | later as a digging tool. Articulates best with left hand and point facing down and inward                                                |  |  |  |  |  |  |  |  |
|       | 4 |                                                                                                                                          |  |  |  |  |  |  |  |  |
|       | 4 |                                                                                                                                          |  |  |  |  |  |  |  |  |
|       | 4 |                                                                                                                                          |  |  |  |  |  |  |  |  |
|       | 4 |                                                                                                                                          |  |  |  |  |  |  |  |  |
|       | 5 | kely) but use unknown. Perhaps side scraper or terminus broke off                                                                        |  |  |  |  |  |  |  |  |
|       | 5 | scar Probable reuse from axe or wedge to sidescraper                                                                                     |  |  |  |  |  |  |  |  |
|       | 5 | has evidence of dried mud or clay backsplash                                                                                             |  |  |  |  |  |  |  |  |
|       | 5 | r. Could be left-handheld dagger/perforator/digger but otherwise unknown. Bulb is angular hook                                           |  |  |  |  |  |  |  |  |
|       | 5 | ed if handheld)                                                                                                                          |  |  |  |  |  |  |  |  |
|       | 5 |                                                                                                                                          |  |  |  |  |  |  |  |  |
|       | 5 | held)                                                                                                                                    |  |  |  |  |  |  |  |  |
|       | 5 | . Also left-handheld. Probable reuse from axe or wedge to sidescraper                                                                    |  |  |  |  |  |  |  |  |
|       | 5 | blade at a place that has a linear fracture along a dark surface line. A second dark line on the surface suggests the mason drew lines w |  |  |  |  |  |  |  |  |
|       | 5 |                                                                                                                                          |  |  |  |  |  |  |  |  |
|       | 5 | oint and tang perhaps for hafting                                                                                                        |  |  |  |  |  |  |  |  |
|       | 5 |                                                                                                                                          |  |  |  |  |  |  |  |  |
|       | 5 | ic container but made of lithic, not clay, material. Similar to material from 15 de Março). Still has wet mark in video                  |  |  |  |  |  |  |  |  |
|       | 5 | kings. Top well worked. Probably left-handheld but right not ruled out                                                                   |  |  |  |  |  |  |  |  |
|       | 5 |                                                                                                                                          |  |  |  |  |  |  |  |  |
|       | 5 | l retouch. Convex contouring on top edge perhaps for hafting. In truth 3 edges could have been used. End for cleaving, long side for c   |  |  |  |  |  |  |  |  |
|       | 5 |                                                                                                                                          |  |  |  |  |  |  |  |  |
|       | 5 | at hammer end. Articulates well with full-lefthand grip                                                                                  |  |  |  |  |  |  |  |  |
|       | 5 | d). Probable hafted spearhead                                                                                                            |  |  |  |  |  |  |  |  |
|       | 5 |                                                                                                                                          |  |  |  |  |  |  |  |  |
|       | 6 | ring to a sharp back edge but narrow and fragile. Perhaps had dual use, best described like a medieval warhammer                         |  |  |  |  |  |  |  |  |



Painel Pilao Excavation Material Catalog .xlsx

| Level |                                                                                                                                               |  |  |  |  |  |  |  |  |  |
|-------|-----------------------------------------------------------------------------------------------------------------------------------------------|--|--|--|--|--|--|--|--|--|
| 6     | Possibly hafted? probable left-handed end scraper. alternatively axe or intended axe, but also could have been backblade when hafted          |  |  |  |  |  |  |  |  |  |
| 6     |                                                                                                                                               |  |  |  |  |  |  |  |  |  |
| 6     | is was formed. Consider heat-treated sandstone. Probably was a hafted spear head                                                              |  |  |  |  |  |  |  |  |  |
| 6     | a chisel, while the interior concave surface is not smooth with signs of scraper use. Best explanation is pick axe for digging small holes    |  |  |  |  |  |  |  |  |  |
| 6     | ved lengthwise. One sharp edge and one dull edge. Signs of hafting. Point not so sharp. Use unknown.                                          |  |  |  |  |  |  |  |  |  |
| 6     |                                                                                                                                               |  |  |  |  |  |  |  |  |  |
| 6     | ing or notching                                                                                                                               |  |  |  |  |  |  |  |  |  |
| 6     | also smooth with very linear band. Some mud splashing at one corner. Smoothing smudges on bottom. Probably used as a sander (as               |  |  |  |  |  |  |  |  |  |
| 6     | backing retouch of strong lashing with opposite edge being cutting edge and top end having been a piercing point. Large axe has smooth        |  |  |  |  |  |  |  |  |  |
| 6     | ight have splashing. Could have been right or left handed single-edge knife. Side scraper not likely because no smooth underside. Pot         |  |  |  |  |  |  |  |  |  |
| 6     | entral wide end- probable hafting. Point end reinforced to indicate projectile point. Almost certainly a throwing spear                       |  |  |  |  |  |  |  |  |  |
| 6     |                                                                                                                                               |  |  |  |  |  |  |  |  |  |
| 6     |                                                                                                                                               |  |  |  |  |  |  |  |  |  |
| 6     |                                                                                                                                               |  |  |  |  |  |  |  |  |  |
| 6     |                                                                                                                                               |  |  |  |  |  |  |  |  |  |
| 6     |                                                                                                                                               |  |  |  |  |  |  |  |  |  |
| 6     |                                                                                                                                               |  |  |  |  |  |  |  |  |  |
| 6     |                                                                                                                                               |  |  |  |  |  |  |  |  |  |
| 7     | hy from chipping during transit                                                                                                               |  |  |  |  |  |  |  |  |  |
| 7     |                                                                                                                                               |  |  |  |  |  |  |  |  |  |
| 7     | t middle of flake indicates hafting for projectile.                                                                                           |  |  |  |  |  |  |  |  |  |
| 7     |                                                                                                                                               |  |  |  |  |  |  |  |  |  |
| 7     |                                                                                                                                               |  |  |  |  |  |  |  |  |  |
| 7     |                                                                                                                                               |  |  |  |  |  |  |  |  |  |
| 7     | right side from the back end suggests hafting or lashing, but to the left side from backing edge is thickest. Piece is asymmetrical. No signs |  |  |  |  |  |  |  |  |  |
| 7     | ons possibly caused by repeated stabbing motion. Either edge is dulled, could have been a hammerstone drill against other stones. M           |  |  |  |  |  |  |  |  |  |
| 7     | appearance to a folsom point. Tapering at broad end suggests hafted spear point.                                                              |  |  |  |  |  |  |  |  |  |
| 7     | cates strong stabbing or perhaps twisting. Tip of point not sharp, probably broken off. Surface near base has linear dark mark across r       |  |  |  |  |  |  |  |  |  |
| 7     | hook, indentation on underside, both suggest possibly mounted . Also articulates with right hand. Either back of hook or front of hook        |  |  |  |  |  |  |  |  |  |
| 7     | er to haft. Numerous black streaks on surface. Axe edge and corner significantly whiter, perhaps from impacts?                                |  |  |  |  |  |  |  |  |  |

Painel Pilao Excavation Material Catalog .xlsx

|           |                                                                                                                                           |  |  |  |  |  |  |  |  |  |
|-----------|-------------------------------------------------------------------------------------------------------------------------------------------|--|--|--|--|--|--|--|--|--|
| Level     |                                                                                                                                           |  |  |  |  |  |  |  |  |  |
| 7         |                                                                                                                                           |  |  |  |  |  |  |  |  |  |
| 7         |                                                                                                                                           |  |  |  |  |  |  |  |  |  |
| 7         |                                                                                                                                           |  |  |  |  |  |  |  |  |  |
| 7         |                                                                                                                                           |  |  |  |  |  |  |  |  |  |
| 7         |                                                                                                                                           |  |  |  |  |  |  |  |  |  |
| 7         |                                                                                                                                           |  |  |  |  |  |  |  |  |  |
| 7         |                                                                                                                                           |  |  |  |  |  |  |  |  |  |
| 7         |                                                                                                                                           |  |  |  |  |  |  |  |  |  |
| 7         |                                                                                                                                           |  |  |  |  |  |  |  |  |  |
| 7         |                                                                                                                                           |  |  |  |  |  |  |  |  |  |
| 7         |                                                                                                                                           |  |  |  |  |  |  |  |  |  |
| 7         |                                                                                                                                           |  |  |  |  |  |  |  |  |  |
| 7         |                                                                                                                                           |  |  |  |  |  |  |  |  |  |
| 8         | Could have been a curved sidescraper with endscraper use for scraping large wooden logs. Articulates best with left hand. Or could ha     |  |  |  |  |  |  |  |  |  |
| 8         |                                                                                                                                           |  |  |  |  |  |  |  |  |  |
| 8         |                                                                                                                                           |  |  |  |  |  |  |  |  |  |
| 8         | oth as though was rubbed against something to release its color.                                                                          |  |  |  |  |  |  |  |  |  |
| 8         | 2 pieces. Could have been hafted. Scraper capability less likely due to underside levelling Perhaps projectile flake or cutting tool.     |  |  |  |  |  |  |  |  |  |
| 8         | borehole flakes, whose crystals seem melted together. Also flake has retouch and dark linear marks radiating more or less from off        |  |  |  |  |  |  |  |  |  |
| 8         | ge. Retouch along all top-side surface. Back edge reworked at three angles to make tang. Underside reinforced at bulb of percussion f     |  |  |  |  |  |  |  |  |  |
| 8         | ith all edges tapered sharp and back end thinned and fluted as if for hafting, but lacks projectile point on other end. could be evidence |  |  |  |  |  |  |  |  |  |
| 8         | nd smooth. Rock probably was ornamental                                                                                                   |  |  |  |  |  |  |  |  |  |
| 8         |                                                                                                                                           |  |  |  |  |  |  |  |  |  |
| 8         |                                                                                                                                           |  |  |  |  |  |  |  |  |  |
| 8         |                                                                                                                                           |  |  |  |  |  |  |  |  |  |
| 8         |                                                                                                                                           |  |  |  |  |  |  |  |  |  |
| 9         |                                                                                                                                           |  |  |  |  |  |  |  |  |  |
| 3b        |                                                                                                                                           |  |  |  |  |  |  |  |  |  |
| cave wall |                                                                                                                                           |  |  |  |  |  |  |  |  |  |
| slip wall |                                                                                                                                           |  |  |  |  |  |  |  |  |  |

Painel Pilao Excavation Material Catalog .xlsx

| Level |  |  |  |  |  |  |  |  |  |  |
|-------|--|--|--|--|--|--|--|--|--|--|
|       |  |  |  |  |  |  |  |  |  |  |









Painel Pilao Excavation Material Catalog .xlsx

| Level |  |  |  |  |  |  |  |  |  |  |
|-------|--|--|--|--|--|--|--|--|--|--|
|       |  |  |  |  |  |  |  |  |  |  |











Painel Pilao Excavation Material Catalog .xlsx

| Level |  |  |  |  |  |  |  |  |  |  |
|-------|--|--|--|--|--|--|--|--|--|--|
|       |  |  |  |  |  |  |  |  |  |  |











Painel Pilao Excavation Material Catalog .xlsx

| Level |  |  |  |  |  |  |  |  |  |  |
|-------|--|--|--|--|--|--|--|--|--|--|
|       |  |  |  |  |  |  |  |  |  |  |









Painel Pilao Excavation Material Catalog .xlsx

| Level |  |  |  |  |  |  |  |  |  |  |
|-------|--|--|--|--|--|--|--|--|--|--|
|       |  |  |  |  |  |  |  |  |  |  |









Painel Pilao Excavation Material Catalog .xlsx

| Level     |                                                                                                                                         |  |  |  |  |  |  |  |  |  |
|-----------|-----------------------------------------------------------------------------------------------------------------------------------------|--|--|--|--|--|--|--|--|--|
| 7         | silicified sandstone with very well polished or perhaps vitrified on one side. Two pieces combine to one piece with large smoothed area |  |  |  |  |  |  |  |  |  |
| 7         |                                                                                                                                         |  |  |  |  |  |  |  |  |  |
| 7         |                                                                                                                                         |  |  |  |  |  |  |  |  |  |
| 7         |                                                                                                                                         |  |  |  |  |  |  |  |  |  |
| 7         |                                                                                                                                         |  |  |  |  |  |  |  |  |  |
| 7         |                                                                                                                                         |  |  |  |  |  |  |  |  |  |
| 7         |                                                                                                                                         |  |  |  |  |  |  |  |  |  |
| 7         |                                                                                                                                         |  |  |  |  |  |  |  |  |  |
| 7         |                                                                                                                                         |  |  |  |  |  |  |  |  |  |
| 7         |                                                                                                                                         |  |  |  |  |  |  |  |  |  |
| 7         |                                                                                                                                         |  |  |  |  |  |  |  |  |  |
| 8         |                                                                                                                                         |  |  |  |  |  |  |  |  |  |
| 8         | medium brown silicified sandstone flake bulb. Numerous alterations include a backend tang usually for hafting, a front edge reinforced  |  |  |  |  |  |  |  |  |  |
| 8         | s found together and perhaps related but probably not. Large piece is beige quartz breccia with orangeish coating. A large flake with v |  |  |  |  |  |  |  |  |  |
| 8         |                                                                                                                                         |  |  |  |  |  |  |  |  |  |
| 8         |                                                                                                                                         |  |  |  |  |  |  |  |  |  |
| 8         |                                                                                                                                         |  |  |  |  |  |  |  |  |  |
| 8         |                                                                                                                                         |  |  |  |  |  |  |  |  |  |
| 8         |                                                                                                                                         |  |  |  |  |  |  |  |  |  |
| 8         |                                                                                                                                         |  |  |  |  |  |  |  |  |  |
| 8         |                                                                                                                                         |  |  |  |  |  |  |  |  |  |
| 8         |                                                                                                                                         |  |  |  |  |  |  |  |  |  |
| 8         |                                                                                                                                         |  |  |  |  |  |  |  |  |  |
| 8         |                                                                                                                                         |  |  |  |  |  |  |  |  |  |
| 8         |                                                                                                                                         |  |  |  |  |  |  |  |  |  |
| 8         |                                                                                                                                         |  |  |  |  |  |  |  |  |  |
| 8         |                                                                                                                                         |  |  |  |  |  |  |  |  |  |
| 8         |                                                                                                                                         |  |  |  |  |  |  |  |  |  |
| 8         |                                                                                                                                         |  |  |  |  |  |  |  |  |  |
| 8         |                                                                                                                                         |  |  |  |  |  |  |  |  |  |
| 9         |                                                                                                                                         |  |  |  |  |  |  |  |  |  |
| 3b        |                                                                                                                                         |  |  |  |  |  |  |  |  |  |
| cave wall |                                                                                                                                         |  |  |  |  |  |  |  |  |  |
| slip wall |                                                                                                                                         |  |  |  |  |  |  |  |  |  |

Painel Pilao Excavation Material Catalog .xlsx

| Level |  |  |  |  |  |  |  |  |  |  |
|-------|--|--|--|--|--|--|--|--|--|--|
|       |  |  |  |  |  |  |  |  |  |  |











Painel Pilao Excavation Material Catalog .xlsx

| Level |  |  |  |  |  |  |  |  |  |  |
|-------|--|--|--|--|--|--|--|--|--|--|
|       |  |  |  |  |  |  |  |  |  |  |



Painel Pilao Excavation Material Catalog .xlsx

| Level |  |  |
|-------|--|--|
| 3     |  |  |
| 3     |  |  |
| 4     |  |  |
| 4     |  |  |
| 4     |  |  |
| 4     |  |  |
| 4     |  |  |
| 4     |  |  |
| 5     |  |  |
| 5     |  |  |
| 5     |  |  |
| 5     |  |  |
| 5     |  |  |
| 5     |  |  |
| 5     |  |  |
| 5     |  |  |
| 5     |  |  |
| 5     |  |  |
| 5     |  |  |
| 5     |  |  |
| 5     |  |  |
| 5     |  |  |
| 5     |  |  |
| 5     |  |  |
| 5     |  |  |
| 5     |  |  |
| 5     |  |  |
| 5     |  |  |
| 5     |  |  |
| 6     |  |  |



Painel Pilao Excavation Material Catalog .xlsx

| Level     |                              |  |
|-----------|------------------------------|--|
| 7         |                              |  |
| 7         |                              |  |
| 7         |                              |  |
| 7         |                              |  |
| 7         |                              |  |
| 7         |                              |  |
| 7         |                              |  |
| 7         |                              |  |
| 7         |                              |  |
| 7         |                              |  |
| 7         |                              |  |
| 7         |                              |  |
| 7         |                              |  |
| 8         |                              |  |
| 8         |                              |  |
| 8         | side is not very level and m |  |
| 8         |                              |  |
| 8         |                              |  |
| 8         |                              |  |
| 8         |                              |  |
| 8         |                              |  |
| 8         |                              |  |
| 8         |                              |  |
| 8         |                              |  |
| 8         |                              |  |
| 8         |                              |  |
| 9         |                              |  |
| 3b        |                              |  |
| cave wall |                              |  |
| slip wall |                              |  |

Painel Pilao Excavation Material Catalog .xlsx

|       |  |  |
|-------|--|--|
| Level |  |  |
|       |  |  |
